# ***Multiomics and digital monitoring during lifestyle changes reveal independent dimensions of human biology and health***

Francesco Marabita<sup>1,2</sup>, Tojo James<sup>1,2</sup>, Anu Karhu<sup>1</sup>, Heidi Virtanen<sup>1</sup>, Kaisa Kettunen<sup>1,6</sup>, Hans Stenlund<sup>3</sup>, Fredrik Boulund<sup>4</sup>, Cecilia Hellström<sup>5</sup>, Maja Neiman<sup>5</sup>, Robert Mills<sup>1</sup>, Teemu Perheentupa<sup>1</sup>, Hannele Laivuori<sup>1,7,8</sup>, Pyry Helkkula<sup>1</sup>, Myles Byrne<sup>1</sup>, Ilkka Jokinen<sup>1</sup>, Harri Honko<sup>9</sup>, Antti Kallonen<sup>9</sup>, Miikka Ermes<sup>10</sup>, Heidi Similä<sup>10</sup>, Mikko Lindholm<sup>10</sup>, Elisabeth Widen<sup>1</sup>, Samuli Ripatti<sup>1</sup>, Maritta Perälä-Heape<sup>11,12</sup>, Lars Engstrand<sup>4</sup>, Peter Nilsson<sup>5</sup>, Thomas Moritz<sup>3,13</sup>, Timo Miettinen<sup>1</sup>, Riitta Sallinen<sup>1,2</sup>, Olli Kallioniemi<sup>1,2</sup>

<sup>1</sup>Institute for Molecular Medicine Finland (FIMM), HiLIFE, University of Helsinki, Helsinki, Finland. <sup>2</sup>Science for Life Laboratory, Department of Oncology-Pathology, Karolinska Institutet, Stockholm, Sweden. <sup>3</sup>Science for Life Laboratory, Swedish Metabolomics Centre, Department of Forest Genetics and Plant Physiology, Swedish University of Agricultural Sciences, Umeå, Sweden. <sup>4</sup>Science for Life Laboratory, Center for Translational Microbiome Research, Department of Microbiology, Tumor and Cell biology, Karolinska Institutet, Stockholm, Sweden. <sup>5</sup>Science for Life Laboratory, Division of Affinity Proteomics, Department of Protein Science, KTH Royal Institute of Technology, Stockholm, Sweden. <sup>6</sup>HUS Diagnostic Center, Laboratory of Genetics, University of Helsinki and Helsinki University Hospital, Helsinki, Finland. <sup>7</sup>Medical and Clinical Genetics, University of Helsinki and Helsinki University Hospital, Helsinki, Finland. <sup>8</sup>Department of Obstetrics and Gynecology, Tampere University Hospital and Tampere University, Faculty of Medicine and Health Technology, Tampere, Finland. <sup>9</sup>Tampere University of Technology, Tampere, Finland <sup>10</sup>VTT Technical Research Centre of Finland, Espoo, Finland. <sup>11</sup>Faculty of Medicine, University of Oulu, Oulu, Finland. <sup>12</sup>Centre for Health and Technology, University of Oulu, Oulu, Finland. <sup>13</sup>Novo Nordisk Foundation Center for Basic Metabolic Research, Faculty of Health and Medical Sciences, University of Copenhagen, Copenhagen, Denmark.

## ***Abstract***

In order to explore opportunities for personalized and predictive health care, we collected serial clinical measurements, health surveys and multiomics profiles (genomics, proteomics, autoantibodies, metabolomics and gut microbiome) from 96 individuals. The participants underwent data-driven health coaching over a 16-month period with continuous digital monitoring of activity and sleep. Multiomics factor analysis resulted in an unsupervised, data-driven and integrated view of human health, revealing distinct and independent molecular factors linked to obesity, diabetes, liver function, cardiovascular disease, inflammation, immunity, exercise, diet and hormonal effects. The data revealed novel and previously uncovered associations between risk factors, molecular pathways, and quantitative lifestyle parameters. For example, ethinyl estradiol use had a distinct impact on metabolites, proteins and physiology. Multidimensional molecular and digital health signatures uncovered biological variability between people and quantitative effects of lifestyle changes, hence illustrating the value of the combined use of molecular and digital monitoring of human health.

40 Longitudinal measurements of clinical laboratory tests, multiomics profiles, and digital health  
monitoring using wearable sensors could facilitate a comprehensive analysis of human health and the  
42 impact of lifestyle and disease. This provides opportunities to explore human systems biology and to  
predict and intervene in processes leading to disease. However, our ability to make use of such data  
44 and define actionable insights, correlations and causal patterns is limited. There is a shortage of deep  
integrated datasets, where different dimensions of human biology have been explored at the same  
46 time and their changes over time recorded and/or connected with digital monitoring data from  
wearable devices. Each individual has a unique profile, composed of genetic, epigenetic, molecular,  
48 clinical and lifestyle parameters, which may change over time during development, aging and disease  
transitions. These processes cannot be understood as a single general pathway for the average human  
50 or patient, but they can be better described as a collection of individual health trajectories, where  
changes in individual variables are highly interconnected. Several studies have investigated the use of  
52 individualized molecular profiles to assess disease risks or the connection between omics  
measurements and clinical tests, using an n-of-one longitudinal approach<sup>1,2</sup>, a cross-sectional design<sup>3</sup>,  
54 a controlled longitudinal perturbation study<sup>4</sup>, and a cohort study with personal behavioural coaching<sup>5</sup>.  
More recently, other studies<sup>6-8</sup> have analysed longitudinal data over an extended time period in a  
56 cohort of individuals at risk for diabetes, while another prospective observational study investigated  
the stability of the individual molecular signatures<sup>9</sup>.

58 The Digital Health Revolution (DHR) program<sup>10</sup> was based on the concept that future healthcare  
strategies will evolve in a direction which allows citizens to control and make use of their personal data  
60 to improve their health and wellness. The project aimed at implementing proactive P4 healthcare  
(predictive, preventive, personalized, and participatory), with multi-level molecular and digital data.  
62 Within this framework, we integrated deep multiomics profiles and connected them to health surveys,  
clinical observations and digital health measurements. We aimed to 1) integrate longitudinal multi-  
64 omics and digital health data between and within people over time to reveal subgroups and personal  
trajectories; 2) exploit the discovered associations to understand novel links between molecular,  
66 clinical and digital health data and 3) verify if data feedback and coaching would guide and motivate

people to undertake lifestyle changes. Overall, we aimed at achieving a holistic understanding of the  
68 parameters involved in different aspects of human biology and health. To accomplish these goals, we  
applied multiomics factor analysis and then connected the learned factors with interpretable  
70 characteristics of health and behaviour as well as quantitative digital health data.

## **Results**

### **72 Study overview**

We carried out a 16-month longitudinal study on 96 individuals (aged 25-59) recruited from an  
74 occupational healthcare clinic in Helsinki, Finland (Supplementary Figure 1-2 and Supplementary Table  
1). The participants had no previously diagnosed serious chronic diseases, although we allowed  
76 individuals with risk factors for chronic diseases to participate. We acquired comprehensive  
measurements of health and behaviour, including anthropometrics, clinical laboratory tests,  
78 questionnaire data, physical fitness tests, and activity and sleep quantification with a wearable device.  
In addition, we performed a series of omics measurements to study the genome, the plasma proteome  
80 and metabolome, the autoantibody profile and the gut microbiome. The prospective collection of  
molecular and digital profiles resulted in a thorough longitudinal dataset of human health and lifestyle  
82 (Figure 1). We defined baseline molecular profiles and longitudinal data trajectories in the participants  
during personalized lifestyle coaching. We collected over 20,000 biological samples during five study  
84 visits and generated a compendium of >53 million primary data points for 558,032 distinct features.  
Two types of feedback were applied to stimulate and motivate lifestyle changes. First, actionable  
86 health data were returned to participants via a web dashboard and interpreted by a study physician,  
starting from the second visit. Second, personal data-driven coaching was provided, including three  
88 face-to-face and six remote meetings, plus continuous email and phone support, starting from the  
third visit. Personal actionable possibilities were identified with the help of questionnaires, clinical  
90 laboratory tests and physical examination and focused on diet, exercise, mental wellbeing, stress and  
time management. Out of the 107 people enrolled, 96 completed the study. The data-driven coaching

92 positively impacted on the health of the participants, and 86% reported improvement in at least of the  
following aspects: diet, exercise, sleep, mental wellbeing, stress management, drinking or smoking  
94 (Supplementary Figure 3). For example, the percentage of people who did not exercise decreased  
from 9% to 1%, the percentage of smokers decreased from 16% to 8%, and the percentage of daily  
96 drinkers from 8% to 5%. A major achievement was the decrease in the prevalence of vitamin D  
deficiency (31% to 16%, Sallinen et al. The Journal of Nutrition, in press). The participants described  
98 the wearable device, the return of personal health data and the tailored coaching as the most  
motivating aspects of the study (Supplementary Figure 3). Overall, the subjects were enthusiastic  
100 about participating and 76% indicated that they would again participate in a similar study.

### ***Longitudinal actionable changes***

102 We defined a *phenotype* using the ensemble of questionnaires, anthropometrics, vitals and clinical  
laboratory tests. Actionable health issues were defined at baseline, including dyslipidaemia,  
104 overweight and obesity, elevated systolic blood pressure, low vitamin D, elevated blood glucose,  
anaemia and self-reported obstructive sleep apnea (Supplementary table 1 and Supplementary Figure  
106 4).

We first analysed the clinical measurements at baseline to define the group of individuals with Out-  
108 Of-Range at Baseline (OORB) values. To explore if data feedback and coaching had a positive effect  
on objective health parameters, we modelled the longitudinal changes in the OORB individuals, based  
110 on the assumption that measurements outside the reference values represented an actionable finding  
to improve lifestyle and health. We analysed the average change per visit, adjusting for sex and age.  
112 We found significant improvements ( $FDR < 0.05$ ) in several key health parameters for the OORB group  
during the course of the study, such as an increase in vitamin D levels and a decrease in blood  
114 pressure, LDL-cholesterol, and total/HDL cholesterol ratio (Figure 2 and Supplementary Table 3).

Secondly, we obtained an overview of all the clinical variables and compared the individuals using  
116 Principal Component Analysis (PCA). The first three PCs (Figure 2) accounted for 44.8% of the variance

and the major drivers of variability were cardiometabolic variables (for PC1 and PC3: BMI, insulin,  
118 fasting glucose, cholesterol, and lipoprotein profiles) and sex-dependent anthropometrics and  
haematological measurements (PC2). Trajectories for selected individuals showed the changes during  
120 subsequent study visits and visualized the improvements in the clinical parameters (Figure 2 and  
Supplementary Figure 5).

122 In summary, we showed that the return of data as well as data-driven lifestyle coaching resulted  
in objective improvements of health behaviour and health outcomes, including physiological and  
124 laboratory measurements indicative of cardiovascular risk.

### ***Multiomics signatures***

#### 126 ***Distinct sources of molecular variability***

We next generated multiomics profiles and set out to explore the association of these variables  
128 with each other and with the clinical features. We first investigated the sources of variability in the  
omics, by partitioning the variance for each feature into personal variation (i.e. between-individual),  
130 known factors (age, sex and study visit) and residual unknown sources (for example biological,  
environmental or technical aspects). We found that the personal variation impacted all data types but  
132 to a different extent (Supplementary Figure 6). Autoantibodies represented a highly personal signature  
and on average 92% of the variance was explained by personal variation. Metabolites were dominated  
134 by personal variation (56-71% on average) but residual components were also present (23-35% on  
average). Proteins had similar average personal (49%) and residual components (45%). The  
136 microbiome data was dominated by unexplained factors (68% on average). These results were  
confirmed by an alternative distance-based method (Supplementary Figure 6). We observed that the  
138 average within-individual distance was lower than the between-individual distance, to a different extent  
for different omics, and autoantibodies showed the lowest within-individual distance, i.e. high  
140 similarity.

## ***Understanding the molecular variability***

142 We used Multi-Omics Factor Analysis (MOFA+)<sup>11,12</sup> to carry out an unsupervised analysis of the  
complete multiomics data, hence excluding the clinical variables and other phenotypic data. MOFA+  
144 helped to integrate and interpret the measurements and their variability across all the omics layers.  
The analysis resulted in an interpretable low-dimensional representation in the form of a small number  
146 of independent factors that captured the major sources of variability in the data and originated from  
simultaneous inclusion of baseline and longitudinal differences. The analysis facilitated the  
148 identification of subgroups of samples and the molecular features that contributed to the ordination of  
the samples in the dimensions defined by the factors. An overview of the samples based on the learned  
150 factors is given in Supplementary Figure 7. We identified 14 factors (F1-F14), each explaining a  
minimum of 2% of the variance in at least one data type. The fraction of the total variance explained  
152 across the six omics types varied from 6% for gut microbiome to 95% for the autoantibodies (Figure  
3). Some of the learned factors were predominantly associated with one omics type, while others  
154 contributed to several omics, suggesting that the underlying biological determinants might affect  
different types of measurements simultaneously. We then explored the molecular basis of each factor.  
156 First, we investigated the contribution of the original omics features, by inspecting the loadings on  
each factor, which represent their weights, in order to interpret the nature of the associated biological  
158 domains. Second, we tested the association between the factors and the phenotype, including  
questionnaire data, clinical variables, fitness tests, activity and sleep data, and other metrics. Each  
160 factor was linked to specific phenotypic characteristics (linear models,  $FDR < 0.001$ , Figure 3 and  
Supplementary Table 4). Importantly, most of the factors were associated with distinct sets of variables  
162 across the different categories and thereby defined molecular patterns that were linked to distinct  
aspects of lifestyle and health, including modifiable behavioural aspects, such as diet and exercise.  
164 We then refined the top associations for each factor with a covariate-adjusted statistical model. We  
aimed at accounting for the correlation among observations from the same individual and fitted a linear  
166 mixed model (LMM), with age and sex as fixed effects and the individual as a random effect. We also

168 interpreted the association in view of the contributing molecular features and pathways and the results  
are presented below.

**Obesity and insulin resistance.** The top features with high positive loadings on F11 included  
170 plasma proteins involved in pathways known to be dysregulated in obesity or dyslipidemia (LEP, IL-  
1ra (IL1RN), t-PA (PLAT), FABP4, FGF21, IL-6, LDL receptor)<sup>13-18</sup>. Interestingly, several proteins  
172 reported as protective factors against obesity (GH1, IGFBP1, PON3)<sup>19-21</sup> had negative loadings. We  
found significant correlations between F11 and well-known metabolic traits and clinical measurements  
174 (Figure 4 and Supplementary figure 9). These included positive association with BMI ( $p_{imm}=1.53E-21$ ),  
LDL-cholesterol levels ( $p_{imm}=4.47E-03$ ) and insulin resistance ( $\log_{10}HOMA-IR$ ,  $p_{imm}=6.51E-14$ ). Also,  
176 we found a negative association with HDL-cholesterol ( $p_{imm}=2.16E-06$ ) as well as with measures of  
physical activity and fitness gathered from the questionnaire, such as leisure-time exercise  
178 ( $p_{imm}=1.06E-03$ ) and exercise habits ( $p_{imm}=8.25E-04$ ), or the activity levels in terms of steps/day  
measured by the wearable device ( $p_{imm}=0.01$ ). An inverse correlation was also observed with physical  
180 fitness at the level of upper body ( $p_{imm}=5.53E-05$ ) abdominal ( $p_{imm}=1.59E-03$ ) and lower body  
( $p_{imm}=1.14E-03$ ). Participants with first-degree relatives with diabetes had higher factor values  
182 compared to the individuals who did not report family-history for diabetes ( $p_{imm}=6.25E-03$ ). Finally, an  
individual who was diagnosed with type 2 diabetes during the study had the highest factor values. We  
184 therefore interpreted F11 as strongly related to obesity, insulin resistance and diabetes risk and  
pathogenesis as well as clearly associated with quantitative data on exercise and mobility. F11 was  
186 also associated with overall health, as evidenced by a negative association with self-reported overall  
health ( $p_{imm}=9.26E-07$ ) and a positive correlation with coronary heart disease (CHD) risk score  
188 ( $p_{imm}=0.01$ ). In summary, F11 assisted in estimating molecular patterns of health and behaviour that  
are associated with obesity as well as potential trajectories leading to diabetes.

190 **Impact of hormones and ethinyl estradiol.** F9 was influenced by sex and sex-specific biological  
differences in multiomics. In contrast, F14 was linked to the use hormone replacement therapy or  
192 hormonal contraception in women. Young women reporting the use of a contraceptive containing

ethinyl estradiol (EE) had particularly high F14 values ( $p_{\text{imm}}=2.28\text{e-}10$ ). Consistent with this  
194 observation, known estrogen-sensitive plasma proteins had the highest positive weights for F14  
(Figure 4), but there were also contributions from cortisol and thyroxine levels, which we interpreted  
196 as potential secondary effects<sup>22,23</sup>. Pulse ( $p_{\text{imm}}=9.32\text{E-}03$ ), hsCRP (log-transformed,  $p_{\text{imm}}=7.40\text{E-}09$ )  
and leukocyte numbers (log-transformed,  $p_{\text{imm}}=6.09\text{e-}05$ ) also positively correlated with F14 and  
198 alterations of these clinical variables were prominent in women with particularly high factor values.  
These observations indicated, in an unsupervised manner, that EE use is associated with strong  
200 molecular and physiological effects on human biology, including increased levels of inflammation,  
impact on thyroid, cortisol levels and pulse. These effects are distinct from all the other sources of  
202 variability in our study population,

**Dietary habits.** F3 and F6 were mostly influenced by metabolites and associated with distinct  
204 dietary habits assessed with the questionnaire (Supplementary figure 10), such as consumption of  
fresh fruit and vegetables. However, when accounting for the effect of age, sex and individual, the  
206 dietary characteristics were not significantly associated with the factors ( $p_{\text{imm}}>0.05$ ), suggesting that  
the associations may be explained by individual-specific (person-to-person) differences in dietary  
208 patterns and not by changes in the diet during the study. Moreover, F7 was largely linked to caffeine  
use as determined both by the molecular nature of the features and the associations with questionnaire  
210 data. Indeed, caffeine and its metabolites had the largest loadings for F7 (Figure 4), and this factor was  
strongly correlated with self-reported coffee consumption ( $p_{\text{imm}}=7.63\text{E-}12$ ).

**Lipids, free fatty acids and fatty acid esters.** F5, F8 and F12 (Supplementary figure 11) were  
212 each reflecting distinct aspects of the plasma lipid composition. Free fatty acids (FFA) contributed  
mostly to F12, while fatty acid esters (FAEs), mostly in the form of acylcarnitines, contributed to F5  
214 and F8. In the postabsorptive state, blood FFA are a result of lipolysis from adipose tissue and they  
reflect dietary intake<sup>24</sup>, while changes in the acylcarnitine pool can be linked to changes in fatty acid  
216 oxidation. Accumulation of acylcarnitines as products of incomplete mitochondrial fatty acid oxidation  
has been associated with obesity and diabetes<sup>25</sup>. Even after adjusting for the covariates, F12 was  
218



negatively associated with blood pressure (systolic,  $p=0.035$ ; diastolic  $p=0.021$ ), in line with the known  
220 association between FFA and hypertension<sup>26</sup>. F5 and F8 were both strongly associated with clinical  
measurements indicating dyslipidemia, including total cholesterol ( $p_{imm}=1.64E-08$  and  $p_{imm}=8.48E-10$ )  
222 LDL cholesterol ( $p_{imm}=7.13E-06$  and  $p_{imm}=1.74E-05$ ), triglycerides ( $p_{imm}=3.74E-05$  and  $p_{imm}=8.45E-7$ )  
and ApoB ( $p_{imm}=3.24E-08$  and  $p_{imm}=9.11E-06$ ), thus implicating dysregulation of lipid metabolism as  
224 an underlying influence for F5 and F8. Importantly, F5 and F8 were only weakly associated with BMI  
( $R^2=0.004$  and  $R^2=0.006$ ;  $p_{imm}=0.05$  and  $p_{imm}=0.07$ ), suggesting that these two factors were associated  
226 with dyslipidemia independently of obesity.. Sex was a significant covariate for the associations seen  
for F5 (maximum  $p_{imm}=1.21E-05$ ) but not for F8 (minimum  $p_{imm}=0.73$ ).

228 **Hepatic function.** F2 was influenced by metabolites connected to liver function (Supplementary  
figure 12). Bile acids or their glycine or taurine conjugates had negative weights and a major impact in  
230 the classification of the individuals along the F2 axis. Furthermore, F2 included liver-associated  
metabolites that on average were increased in the samples with negative factor values. These  
232 metabolites are known to be increased after liver disease (biliverdin) or are known to be used to  
eliminate hepatic nitrogen pool (glutamine, hippuric acid, phenylacetylglutamine). The liver is a  
234 fundamental organ in maintaining metabolic homeostasis, it modulates the composition of the blood  
metabolome and therefore we assumed that F2 reflected the structural and functional integrity of the  
236 liver.

**Autoantibodies.** F1 was mostly explained by the presence of autoantibodies, it was influenced by  
238 the binary nature of the autoantibody data (presence/absence) and by the stable autoantibody  
signature over time. Indeed, autoantibodies can be considered as an IgG reactivity barcode for each  
240 individual<sup>27</sup>. F1 correlated well with the autoantibody counts and to a lesser extent with the age  
(Supplementary Figure 8), in agreement with the fact that autoreactivity is more common in the elderly,  
242 possibly linked to age-associated B cells<sup>28</sup>.

In summary, we demonstrated that we could dissect the overall pattern of molecular variation  
244 between and within individuals using the multi-omics factor analysis. Each of the 14 factors reflected

distinct aspects of human biology, behaviour, lifestyle, use of drugs (hormones) or potential transitions  
246 to disease.

**248 *Correlation networks: linking molecular features with clinical variables, questionnaire data and digital health monitoring***

We then performed correlation analysis, including all the multiomics data as well as an ensemble  
250 of quantitative or semi-quantitative measures consisting of clinical data, activity and sleep, fitness tests, and other scores. We computed a cross-correlation network between features of different types  
252 using two alternative metrics. For the between-individuals network (BIN), we averaged the measurements from all time points before calculating correlations. We also included 146 genetic trait  
254 scores obtained by summing up the contribution from all the variants associated with each trait as reported by the GWAS catalog. The within-individuals network (WIN) consisted of linear correlations  
256 of repeated measures of pairs of features within-participants. It estimated a common regression slope, representing a measure of association shared among individuals, and resulting from changes  
258 occurring at the individual level during the study. The BIN and WIN were calculated after age- and sex-adjustment and p-values were corrected for multiple hypothesis (FDR<0.05). We then identified  
260 distinct communities of interconnected features (modules), as an aid for interpretation.

Among the strongest correlations of the BIN ( $|\rho| > 0.6$ ), we detected distinct measurements of the  
262 same molecular entity using different assays (i.e. TSH (clinical-PEA),  $\rho = 0.96$ ; Cholesterol (clinical-GCMS)  $\rho = 0.82$ ), or associations between different features such as LDL-receptor protein and  
264 triglycerides ( $\rho = 0.82$ ), or LEP protein and BMI ( $\rho = 0.68$ ). The network consisted of 375 nodes and 570 edges (Supplementary table 5). Several clinical variables represented hubs with the largest number of  
266 associated connections to metabolites and proteins (Figure 5). These hubs were often inversely correlated with modifiable behavioural risk factors, such as wearable-based measures of physical  
268 activity (e.g. insulin with intense physical activities, waist circumference with number of steps). Similarly, measures of physical fitness (lower body, abdominal and upper body) correlated inversely  
270 with plasma LEP levels. Notably, the proteins with common genetic defects in familial

hypercholesterolemia appeared in the cardiometabolic subnetwork (LDLR, PCSK9, and ApoB). For  
272 instance, PCSK9, a pharmacological target of LDL-lowering therapies, correlated positively to several  
glycerophospholipids and ApoB, but negatively to CMPF (3-Carboxy-4-methyl-5-propyl-2-  
274 furanpropionic acid), a metabolite that is formed from the consumption of fish oil and may have positive  
metabolic effects<sup>29</sup>. The whole network included 24 GWAS summary scores (Supplementary figure  
276 13), and 11 scores concerned haematological measurements (erythrocytes, leukocytes and  
thrombocytes). We observed a direct link between the genetic score and the corresponding trait  
278 measured in this study, including haematological traits, but also associations between proteins or  
metabolites and the genetic susceptibility to a disease/trait with cardiometabolic relevance. For  
280 example, we observed an inverse association between the genetic risk score for BMI in physically  
inactive individuals and several FAEs, carnitine and tyrosine. Furthermore, an inverse association was  
282 observed between the genetic risk score for abdominal aortic aneurysm and IL-6RA levels, supporting  
the contribution of IL-6 signalling and inflammation in the pathogenesis of this disease<sup>30</sup>. These  
284 observations indicate that the between-individuals variability may be explained at least partly by  
personal genetic differences and that these genetic differences exert their impact via specific  
286 molecular pathways.

The WIN captured associations between pairs of features that resulted from concordant variation  
288 in repeated measures obtained from the same individuals. This source of variation is assumed to be  
complementary to the BIN, it does not average or aggregate the data, neither does it violate the  
290 assumption of independence of the observations. Thus, the edges in this network resulted from  
changes occurring over time and not due to baseline between-individuals characteristics. The network  
292 consisted of 302 nodes and 611 edges (Supplementary table 5). Only 46 edges and 151 nodes were  
also detected in the BIN, reflecting how BIN and WIN highlight non-overlapping correlations, i.e. they  
294 reveal distinct types of biological associations. For example, in an inflammation-related subnetwork  
(Figure 5), hsCRP and leukocytes lay in the proximity of cytokines, cytokine receptors, proteins  
296 involved in leukocyte functions and members of the tryptophan metabolic pathway (kyneurine and  
indoles). This subnetwork was not revealed in the BIN and the observed edges likely originate from

298 individuals transitioning through inflammatory states or infections during the study, although other  
sources of variations (season, exercise etc.) cannot be excluded. Other edges specifically observed in  
300 the WIN showed metrics of activities and sleep in the proximity of several metabolites and proteins.  
Among the proteins, we observed well-known members of lipid metabolism pathways (LEP, LPL) and  
302 proteins with related functions (PTX3<sup>31,32</sup>, NRP1<sup>33</sup>, PRSS8<sup>34</sup>). Correspondingly, FFA and FAEs appeared  
in this subnetwork. These correlations suggest that changes in dietary factors, fat metabolism, physical  
304 activity and sleep behavior as a result of the lifestyle coaching could be further investigated as possible  
explanations for the observed effects.

### 306 ***Personal trajectories***

In order to stimulate lifestyle changes and improve health, we defined personalized, actionable  
308 data-driven possibilities for lifestyle guidance for each participant. This strategy resulted in subgroups  
where similar changes in actionable clinical variables were present. When considered at the level of  
310 individuals, the changes unfolded into personal trajectories, and often a connection with the patterns  
in multiomics data were established. Changes in diet and exercise were common among participants,  
312 as illustrated by the case of a 28-year male, where the tailored lifestyle change (nutrition and exercise)  
resulted in an improvement of clinical variables and self-rated health (Figure 2 and Figure 6). At  
314 baseline, he presented with obesity, high systolic blood pressure, dyslipidaemia, elevated insulin levels  
and elevated hsCRP (Figure 6A). During the study, he reported increases in self-rated health, frequency  
316 and amount of exercise (Figure 6C). The latter was also objectively confirmed by the activity levels  
detected by the wearable device (Figure 6B). The sustained level of activity resulted in longitudinal  
318 changes in key actionable clinical variables at the end of the study (Figure 6A), including decreased  
BMI, improved lipid profile, reduced low-grade systemic inflammation, reduced systolic blood  
320 pressure, normalization of insulin levels and improvement of the estimated insulin resistance. These  
interpretable changes reflected in molecular changes, as shown by the MOFA+ factors (Figure 6D).  
322 Indeed, the improvement in BMI, lipid profile and insulin resistance, combined with an increase in  
physical activity, was reflected as a decrease in F11 values. We observed decrease of obesity- and

324 inflammation-associated proteins and other adaptations suggesting an involvement of the GH/IGF-1  
axis. Similarly, the changes in F8 and F10 - associated with fatty acid esters and lipid metabolism -  
326 reflected the variation in the total cholesterol levels. Several acylcarnitines peaked at the third visit,  
suggesting a metabolic adjustment during a transition period toward increased physical activity. For  
328 comparison, we show (Figure 2 and Supplementary figure 14) the case of a 36-year-old female,  
presenting with obesity, dyslipidaemia, hyperinsulinemia and hyperglycaemia at baseline. The study  
330 protocol required a referral to a physician, and she was indeed diagnosed with type 2 diabetes. During  
the study, phenotypic changes occurred: reduction in the glucose, insulin and cholesterol levels, as a  
332 result of a new therapeutic intervention (Metformin, Atorvastatin, Empagliflozin), while she did not  
undertake a genuine lifestyle change and did not increase physical activity. Interestingly, the F11 levels  
334 did not change much, this individual remained an outlier at all the time points and we did not observe  
a trend in the corresponding molecular features indicating reduction of inflammation and adiposity.

336 A case of a participant with a respiratory tract infection is illustrated in Supplementary Figure 15,  
it shows the dysregulation of metabolic pathways during infection as previously observed<sup>1,6</sup>, and  
338 highlights how metabolic signatures can be prominently altered during infections.

## 340 **Discussion**

The convergence of systems medicine, digital health, big data, consumer-driven healthcare and  
342 social networks is at the heart of the P4 healthcare. To facilitate the adaptation of the P4 approach  
into the current healthcare systems, longitudinal health intervention studies are needed. Indeed,  
344 numerous initiatives exist to profile healthy and diseased individuals with clinical features, multiomics  
and digital health monitoring<sup>1-8</sup>. However, fewer studies have simultaneously combined longitudinal  
346 multiomics profiles, digital health data monitoring, data feedback and tailored lifestyle coaching. Here,  
we report a truly comprehensive approach to generate longitudinal data from 96 people who  
348 underwent tailored lifestyle coaching for over 16 months. Our study provides several steps to promote  
an understanding of human biology and health over time and, at the same time, a data-driven,  
350 individualized approach to motivate and monitor the impact of lifestyle changes. Firstly, our data  
emphasize the importance of multiomics profiles in preventive and personalized medicine approaches.  
352 Most of the published large-scale medical research initiatives have explored predominantly the impact  
of genetics on health parameters. We think that the precision medicine toolbox should include  
354 multiomics and digital health readouts, longitudinal measurements for each individual. Secondly, we  
have shown that by integrating all the data in an unsupervised analysis we can rediscover known  
356 associations between molecular features and lifestyle changes, health behaviours, adiposity, diet,  
physical activity or hormonal use as well as identify numerous novel associations. We have also shown  
358 how data from a wearable device correlate with changes in specific molecular pathways, which could  
help to understand the molecular effects of e.g. exercise and sleep on specific aspects of human  
360 biology. Thirdly, our data-driven feedback and individualized lifestyle coaching stimulated behavioural  
changes and we anticipate that this model could become broadly applicable in the future. In this study,  
362 genetics, questionnaire and clinical measurements were returned to the participants in real-time, while  
the full multiomics data were analyzed retrospectively. The analysis of all molecular data at the end of  
364 the study also helped to ensure lower cost, higher quality and consistency, and elimination of batch  
effects.

366 Our data analysis resulted in a low-dimensional space to explore the complexity of the multiomics  
and the connection to known sources of variation. Among those, sex, age and BMI are among the  
368 most studied and often are confounders in association studies. For this reason, we regressed out the  
effect of age and sex in the correlation networks, but we allowed the effect of these covariates to  
370 appear in the MOFA+ analysis, in order to verify if separate, independent axes of variability could be  
retrieved. Indeed, we verified that BMI, as a proxy for adiposity and obesity, could only be strongly  
372 associated with one factor (F11) and that there was no strong significant association of obesity with  
any of the other factors. Similarly, sex was associated only with a few factors (F5, F9, F11). Therefore,  
374 the identified axes of variation represented a spectrum of molecular variation that could be attributed  
to a variety of lifestyle factors and could not simply be explained by the confounding effects of obesity,  
376 age or sex. This strongly supports the power of our analysis to extract independent axes of molecular  
variability of potential etiological and pathogenetic importance, and hence with opportunities for  
378 unbiased health monitoring.

An example of a highly interesting and novel observation is that the use of oral contraceptives  
380 containing EE in a subset of the female participants was alone sufficient to influence the covariance of  
the proteome and metabolome. The effect was so distinct that F14, as uncovered from this  
382 unsupervised MOFA analysis, was almost completely due to the use of this one hormonal drug. We  
suggest that the strength of this association could have been even greater if we had detailed  
384 information on the days of the administration of the hormone and the days of the menstrual cycle of  
all females when samples were obtained. These effects were identified in a data-driven manner and  
386 represented a distinct dimension of variability in human biology influenced by an external hormone.  
Thus, the hormonal effects were strong enough to be picked up above all other causes of variability  
388 and noise. F14 could therefore be a potentially useful biomarker to assess exposure to EE as well as  
associated health effects. The association with pulse and the effects on inflammation, adrenal and  
390 thyroid function have been individually investigated before<sup>22,23</sup>, but the full depth and width of this  
signature have not been previously described. EE is a strong synthetic hormone and hence it is not as  
392 unexpected that modulation of this pathway could have consequences on the proteome and

metabolome as well as body physiology. However, considering that the use of this contraceptive is  
394 common, we point out that this will need to be accounted for as a potential bias in all epidemiological  
and multiomics studies. The EE-inducible signature could otherwise cause strong false interpretations  
396 in biomarker studies. For example, serum TFF3 has been reported to be elevated in women with breast  
cancer<sup>36</sup> and FETUB is a highly abundant liver-secreted protein sensitive to estrogen and is reported  
398 to be increased in type 2 diabetes<sup>37,38</sup>.

Our analysis showed that genetic determinants could explain part of the variability in the  
400 multiomics features. This raises the question of whether this type of multi-omics data integration and  
unsupervised analysis could help to dissect the molecular effects mediating the mechanisms and  
402 pathways on how genetics may influence disease onset. Several hints of such observations were seen,  
such as the associations of IL-6 receptor signalling and abdominal aortic aneurysm.

404 We acknowledge some limitations of this study. Firstly, the sample size may limit the discovery of  
weak associations and hence the conclusions should be confirmed in larger cohorts. Nevertheless,  
406 we retrieved several known associations, likely resulting from strong underlying effect sizes. For  
example, we showed that several blood cell measures in our study were under genetic control, in  
408 agreement with the high heritability of haematological traits<sup>41</sup>. By extension, it is possible that the  
associations with cardiometabolic relevance observed in our study also have larger true effect sizes.  
410 For example, it was remarkable how key cardiovascular risk genes and drug targets, such as PCSK9  
strongly clustered in the network analysis. It has been previously observed that a longitudinal study  
412 design substantially increases the power to identify molecular changes in comparison to a groupwise  
analysis in a population of similar size<sup>4</sup>. Therefore, the presented resource and data analysis could  
414 reveal several other relevant interrelationships to be explored further and validated in external data  
sets. Our work was not a formal interventional study but included longitudinal observations of people  
416 undertaking a tailored health intervention. Individual trajectories and multiomics profiles highlighted  
specific connections when specific cases or subgroups were considered. In addition, in a longitudinal  
418 observational study, changes over time may also be caused by other unknown parameters, such as



seasonal variability known to impact on immune systems gene expression and cellular  
420 composition<sup>42,43</sup>.

Our study illustrated a person-centric data-driven health monitoring that could become part of the  
422 future health care practice. This involved integration of clinical, genetic, multi-omics and digital health  
data as well as unbiased monitoring of longitudinal trends. This study demonstrates the power of  
424 combining multi-omics and lifestyle data as well as new opportunities for predicting health trajectories  
in a holistic, unbiased data-driven manner. This could lead to a re-definition and refinement of the  
426 traditional disease-based taxonomy as well as definition of specific transitions between health and  
disease. This could contribute to preventive approaches via lifestyle and behavioural changes or  
428 pharmaceutical interventions.

## ***Acknowledgements***

430 We thank all the study subjects for their generous participation and commitment. We express our  
sincerest thanks to Riina Aaltonen, Annette Evokari, Iiro Hietamäki, Anna Seppänen and Paula  
432 Vartiainen for their expert assistance. The DHR program was coordinated and managed by the Center  
for Health and Technology, University of Oulu, Finland. Genotyping was performed by the Institute for  
434 Molecular Medicine Finland (FIMM) Technology Centre, HiLIFE, University of Helsinki, Finland.

## ***Author contributions***

436 F.M, T.J., R.S. and O.K. wrote the paper with contributions from all the authors. F.M. designed and  
performed the bioinformatics analyses, interpreted the results, prepared the figures and wrote the  
438 primary version of the paper. T.J. performed bioinformatic data analysis and interpreted the results.  
R.S. coordinated the data collection, supervised the experiments, and was responsible for the project  
440 management. R.S and O.K. designed the project, with contributions from H.V., H.H. and M.P.H., and  
provided conceptual advice and support. M.P.H. acted as a coordinator of the DHR consortium. H.S.

442 and Thonas Moritz performed the metabolomics experiments, analysed the data and contributed to  
the interpretation of the results. F.B. and L.E. performed the microbiome experiments, analysed the  
444 data and contributed to the interpretation of the results. C.H., M.N., and P.N performed the  
autoantibody experiments, analysed the data and contributed to the interpretation of the results. E.W.  
446 and S.R. provided the KardioKompassi algorithm. R.M., T.P., M.B. and Timo Miettinen were  
responsible for data management, database administration, health dashboard and software  
448 development. H.L. was the study physician. P.H. performed genotype imputation. Anu Karhu, I.J., K.K.,  
H.V., H.H., Antti Kallonen, M.E., H.S. and M.L. conducted research.

## 450 ***Competing interests***

O.K. received research funding from Vinnova for collaboration between Astra-Zeneca, Takeda,  
452 Pelago, and Labcyte. O.K. is also a board member and a co-founder of Medisapiens and Sartar  
Therapeutics, and has received a royalty on patents licensed by Vysis-Abbot. R.S. is currently  
454 employed at Crown CRO.

## 456 **Methods**

### ***Ethical permit and consent***

458 The study was conducted in line with the Declaration of Helsinki and approved by the Coordinating  
Ethics Committee of the Helsinki University Hospital, Finland. Each participant provided informed  
460 written consent for the study, biobanking of samples, publication and data sharing. Participants were  
free to drop out any time, but their samples and data were still available for analyses. If a participant  
462 withdrew the consent, samples and data were discarded.

### ***Overview***

464 The observational cohort study was conducted at the Institute for Molecular Medicine Finland  
(FIMM), HiLIFE, University of Helsinki, Finland, between September 2015 and January 2017.  
466 Recruitment was performed in September 2015, and five study visits followed, approximately every  
four months, (Supplementary Figure 1). Every visit included a health check-up and blood and urine  
468 sampling. Before or after every visit, participants collected fecal and saliva samples, filled out a  
questionnaire, and performed fitness tests. Data on physical activity and sleep was collected from the  
470 second visit onward with an activity watch. Key actionable health data were returned to the  
participants via a web dashboard starting at the second visit. Tailored health and wellness advice and  
472 coaching was provided by two personal trainers from the third visit onward. Between visits 4 and 5,  
participants could compare their data to summary measures calculated with the other participants'  
474 data.

### ***Eligibility criteria and recruitment***

476 The requirements included: age of 25-64 years at the study start, sufficient computer skills and  
Internet access via a smartphone compatible with the provided smartwatch; sufficient English  
478 language knowledge to be able to understand simple messages and to use health and wellness

applications. We excluded individuals with severe diseases (cancer, cardiovascular, debilitating  
480 neurological, psychiatric or orthopaedic diseases). However, individuals with risk factors for chronic  
diseases (e.g., obesity, elevated blood pressure, dyslipidaemias, disturbances in sugar metabolism,  
482 mild forms of metabolic syndrome, smoking, moderate drinking or sleep problems) were allowed.  
Individuals diagnosed with or suspected of having rare monogenic diseases were excluded. In  
484 addition, individuals under custody, with special needs or with limited decisional capacity were  
excluded, as well as people suffering from severe forms of alcoholism and depression. Pregnant  
486 women were excluded and women becoming pregnant during the study were no longer asked to  
provide samples or contribute to the study. Altogether, 645 clients of a private occupational health  
488 service (Mehiläinen Töölö, Helsinki, Finland) were invited to participate (Supplementary Figure 1).  
People interested in participating (n=125) filled out a questionnaire to assess eligibility. A total of 107  
490 volunteers of European descent from the Helsinki metropolitan area were selected to participate and  
96 completed the study (Supplementary Table 1).

#### 492 ***Return of personal health data***

The ensemble of anthropometrics, clinical laboratory tests, and physiological measurements is  
494 called clinical variables in this paper. We returned actionable health data via the Health Dashboard  
web application, which allowed participants to: explore and compare their data against reference  
496 values and the mean values for the other participants, fill out questionnaires and read informational  
material. The clinical variables and their reference values were returned starting at visit 2. A physician  
498 interpreted the clinical data and was available to discuss the results with the participants. The  
occupational health service communicated any medically relevant finding requiring immediate actions,  
500 while the study group communicated non-acute findings. Clinical decisions were made according to  
the national Current Care Guidelines (<https://www.kaypahoito.fi/>). Genetic data were returned to  
502 participants under the guidance of a clinical geneticist after visit 2. A personal 10-year risk for coronary  
heart disease (CHD) was communicated using KardioKompassi<sup>44</sup>. The risk model is based on both  
504 traditional (sex, age, family history, smoking, systolic blood pressure, total and HDL cholesterol) and

hereditary risk factors (approximately 49,000 SNPs). If the risk was >10% the participant was referred  
506 to a doctor. We also communicated the risk for low serum 25(OH)D concentration after visit 4 (Sallinen  
et al., The Journal of Nutrition, in press). We returned visualizations of questionnaire data on diet,  
508 physical activity, sitting, sleeping, subjective health status, and mental wellbeing after visit 4. We also  
determined a self-reported obstructive sleep apnea risk score<sup>45</sup>. Participants were able to monitor their  
510 physical activity and sleep data using the Withings Health Mate app starting at visit 2.

### ***Coaching and group meetings***

512 Two personal trainers (PTs) coached participants from visit 3 onward. Coaching included nine 30-  
minute private meetings (three face-to-face and six remote), email/phone support, as well as group  
514 meetings. The PTs were accredited by the European Health and Fitness Association. No structured,  
evidence-based coaching protocol was used, but personal actionable possibilities were defined to  
516 help participants change their behaviour and improve their health. With the help of a physician and a  
nutritionist, the PTs translated and customized actionable possibilities to specific recommendations.  
518 The PTs had access to participants' age, clinical variables, fitness test data, and information about  
their occupation, exercise, and diet. Tailored health advice and coaching were based on each  
520 participant's behaviour, health risks, lifestyle, and goals. One to three relevant, personalized and  
actionable opportunities were offered to guide and motivate participants to make lifestyle changes to  
522 optimize wellness and health and delay predicted pathologies. Personalized advice usually focused  
on diet, exercise, mental wellbeing, or stress and time management. If necessary, a physician limited  
524 exercise. Twenty-one informational group meetings were organized during the study, where  
participants could interact with a physician, a nutritionist, a nurse, PTs, and other experts. Participation  
526 in these meetings was voluntary except for the first, during which a physician and a geneticist  
interpreted the clinical variables data as well as the CHD risk prediction.

528

## 530 **Experimental procedures**

### **Health check-up and clinical variables**

532 Health check-ups occurred on weekdays between 7:30 and noon. Body weight, height, waist and  
hip circumferences, blood pressure, and pulse were measured using standard procedures.  
534 Participants were asked about medications, dietary supplements, and the use of health care services.  
Blood and urine samples were collected at every visit. Fasting ( $\geq 8$  h) blood samples were collected,  
536 and clinical chemistry assays were performed on blood, plasma or serum, at the diagnostic laboratory  
of Mehiläinen Töölö (Helsinki, Finland), United Medix Laboratories Ltd (Helsinki, Finland) and HUS  
538 Diagnostic Center (Helsinki, Finland). Urine samples ( $\geq 2$  h without urinating) were collected using  
standard procedures. A dipstick test was performed on the urine samples at the diagnostic laboratory  
540 of Mehiläinen Töölö (Helsinki, Finland). Aliquots of blood, plasma, serum and urine were frozen at -  
20°C and stored in liquid nitrogen for biobanking.

### 542 **Questionnaire**

Before every visit, participants filled out an online questionnaire, including approximately 150-190  
544 questions, depending on the visit, and covering the following: personal information; sociodemographic  
and socioeconomic characteristics; familial and individual disease history; functional capacity and  
546 health; mental wellbeing; physical activity and exercise habits; diet (including food frequency  
questionnaire, FFQ); smoking; alcohol consumption; sleep; occupational health; personality traits;  
548 attitudes and expectations towards lifestyle changes; monitoring own health and wellbeing;  
expectations towards health technology. Healthy Food Intake Index is a food-based diet quality index,  
550 calculated from the FFQ data and adapting an available method<sup>46</sup>.

552

### ***Fitness tests***

554 After every visit, participants were instructed to perform lower-body (squats, repetitions/30s),  
abdominal (sit-ups, repetitions/30s) and upper-body (push-ups, max number of repetitions) muscular  
556 fitness, balance and mobility tests. Participants executed the tests and uploaded the results to the  
Health Dashboard.

### 558 ***Activity and sleep monitoring***

After the second visit, participants were equipped with the Withings Activité Pop smartwatch,  
560 connected to the Withings Health Mate app, to measure physical activity, energy expenditure and  
sleep. Participants were requested to wear the watch until the end of the study. Wellness Warehouse  
562 Engine<sup>47</sup> embedded in the Health Dashboard was used to authorize and provide the research group  
access to participants' data. Only aggregated daily activity and sleep data were exported and included  
564 in this study.

### ***Salivary cortisol***

566 Participants collected saliva samples within two weeks of every visit, using Cortisol-Salivette®  
with a synthetic swab (Sarstedt). Four samples (awakening, 15 min and 30 min after wake up, bedtime)  
568 were collected on a typical weekday. Time and mood at sampling were recorded. Samples were stored  
at +4°C until aliquoting and storage at -20°C. Salivary cortisol levels were determined at the University  
570 of Trier (Trier, Germany) using a DELFIA immunoassay<sup>48</sup>. The stress scores derived from the  
measurements included: AUCi, AUCg (according to<sup>49</sup>), awakening, evening, peak and Delta (peak -  
572 ground) cortisol levels.

### ***DNA extraction and genotyping***

574 DNA was extracted from whole blood with Chemagic MSM1 (PerkinElmer). Genotyping was  
performed at the FIMM Technology Centre (HiLIFE, University of Helsinki, Finland) using

576 InfiniumCoreExome-24 v1.0 DNA Analysis Kit, iScan system and standard reagent and protocols  
(Illumina). Genotypes were pre-phased with ShapeIT2 and imputed with IMPUTE2. Two pre-phased  
578 reference panels were used (--merge\_ref\_panels): 1000G Phase 1 and a Finnish low-coverage WGS  
imputation reference panel, composed of 1,941 whole-genome sequences (SISu project). Imputation  
580 resulted in 30.3 million quality-filtered variants ( $R^2 > 0.3$  and missingness  $< 0.05$ ).

### **GCMS and LCMS**

582 GCMS and LCMS experiments were performed at the Swedish Metabolomics Center (Umeå). 100  
µl of plasma were processed as described<sup>50</sup>, with the following details: extraction with 900 µl of 90%  
584 v/v methanol, containing internal standards for both GCMS and LCMS, at 30 Hz for 2 minutes; protein  
precipitation at +4 °C; centrifugation at +4 °C, 14 000 rpm, 10 minutes. 50 or 200 µl of supernatant  
586 were evaporated to dryness in a speed-vac concentrator, for GCMS or LCMS analysis respectively,  
and stored at -80 °C. Quality control (QC) samples were created by pooling supernatants. MSMS  
588 analysis (LCMS) was run on the QC samples for identification purposes. Sample batches were created  
according to a randomized run order. For GCMS, derivatization and analysis were performed as  
590 described previously<sup>50</sup>, with the following modifications: 0.5 µL of derivatized sample; splitless injection  
with a L-PAL3 autosampler (CTC Analytics AG); 7890B gas chromatograph (Agilent Technologies);  
592 chemically bonded 0.18 µm Rxi-5 Sil MS stationary phase (Restek Corporation); column temperature  
increased from 70 to to 320 °C at 40 °C/min; Pegasus BT TOFMS (Leco Corporation); solvent delay of  
594 150 s; detector voltage 1800-2300 V. Unprocessed MS-files were exported from the ChromaTOF  
software in NetCDF format to MATLAB R2016a (Mathworks), where processing occurred, including  
596 baseline correction, chromatogram alignment, data compression and Multivariate Curve Resolution.  
The extracted mass spectra were identified by comparisons of their retention index and mass spectra  
598 with known libraries using the NIST MS 2.0 software<sup>51</sup>. Annotation was based on reverse and forward  
searches in the library. LCMS experiments were performed as described<sup>52</sup> and all data processing was  
600 performed using the Masshunter Profinder version B.08.00 (Agilent Technologies). The processing was  
performed both in a target and an untargeted fashion. For target processing, a predefined list of



602 metabolites commonly found in plasma and serum were searched for using the Batch Targeted feature  
extraction in Masshunter Profinder. An in-house LCMS library, built up by authentic standards run on  
604 the same system with the same chromatographic and MS settings, was used for the targeted  
processing. The identification of the metabolites was based on MS, MSMS and retention time  
606 information.

### ***Autoantibody bead arrays***

608 Autoantibody profiling on antigen bead arrays was performed as previously described<sup>27</sup>, at the  
Autoimmunity and Serology Profiling facility at SciLifeLab (Stockholm).

### 610 ***PEA***

Plasma proteins were quantified using Proximity Extension Assay (PEA) at Olink Bioscience  
612 (Uppsala), using 6 panels: Cardiometabolic, CVD II, CVD III, Inflammation I, Metabolism and Oncology  
II. Each panel assayed 92 proteins using a matched pair of antibodies coupled to oligonucleotides,  
614 which form an amplicon by proximity extension and can be quantified by real-time PCR. The data were  
normalized against an extension control and an interplate control and expressed as Normalized Protein  
616 eXpression (NPX) values, which represent an arbitrary relative quantification unit on log<sub>2</sub> scale. The  
NPX values below the limit of detection (LOD) were considered missing and their value was replaced  
618 with the LOD value for each assay.

### ***Microbiome analysis***

620 Participants collected faecal samples within two weeks of every visit. Samples were collected in  
precooled vials placed in styrofoam boxes with ice gel packs and then stored at +4°C for a maximum  
622 of one day until aliquoting, freezing at -20°C, and storage in liquid nitrogen without additives. Thawed  
faecal samples were spun-down and DNA was extracted, with 50 ng of DNA submitted to PCR  
624 amplification as described<sup>53</sup>, using 341f and 805r primers (CCTACGGGNGGCWGCAG and

GTGBCAGCMGCCGCGGTAA) for the V3–V4 regions of 16S rRNA<sup>54</sup>. Sequencing was done on an  
626 Illumina MiSeq with 2x250 bp reads. After quality trimming with Cutadapt, an ASV (amplified sequence  
variants) table was generated using the DADA2 pipeline<sup>55</sup>, including the following steps: filtering and  
628 trimming, learning of error rates, dereplication, sample inference, read pairs merging, removal of  
chimeras and taxonomy assignment using SILVA v128 database.

## 630 ***Bioinformatic analyses***

### ***Longitudinal analysis***

632 We applied Generalized Estimating Equations (GEE) to the quantitative clinical variables to  
investigate the longitudinal changes while controlling for sex and age. As data feedback and coaching  
634 started respectively from visit two and three, we excluded the first visit and considered the second  
visit as baseline. Four time points (0-4) were then considered and we aimed at extracting the average  
636 change per visit, assuming the same change in the values between any two successive visits.  
Furthermore, for each variable, individuals were classified as Out-Of-Range at Baseline (OORB) if the  
638 values were outside the reference range (Supplementary Table 2) at baseline. We assumed that the  
longitudinal changes could be distinct for individuals classified as OORB. In other words, we allowed  
640 the effect of coaching and data feedback to be different in the two groups by introducing an interaction  
term. If the OORB group included at least five individuals, then the variable was modelled as:

642 value ~ Sex + Age + Time.point + OORB + Time.point:OORB

Otherwise, a model with no groups of individuals was considered:

644 value ~ Sex + Age + Time.point

GEE models were fitted using the `geepack` library and exchangeable correlation structure. We  
646 extracted the effects, their standard errors and p-values using the `esticon` function in the `doBy`  
library. If no interaction was specified, the coefficient for Time.point represented the estimated change

648 for all the individuals, expressed as the change occurring between two successive visits. If the  
interaction was included, we considered the change occurring in the ORRB group between two  
650 successive visits, and we extracted the effect as the linear combination of the coefficients of  
Time.point and OORB. P-values were adjusted with the Benjamini-Hochberg method. Model  
652 prediction of the variable values was visualized by stratifying for sex and OORB group. The 95%  
confidence levels were estimated by bootstrapping with 1000 replications.

### 654 ***Dimensionality reduction***

We selected the quantitative clinical variables and imputed missing values using the `imputePCA`  
656 function in the `missMDA` package. Principal Component Analysis (PCA) was performed with the `PCA`  
function in the `FactoMineR` package on scaled data. Variable contribution to a given PC was defined  
658 as the ratio between the squared cosine of a variable and the sum of the squared cosines for all the  
variables for that component.

### 660 ***Data preprocessing***

*Activity and sleep.* We obtained summary measures for the activity and sleep data by calculating  
662 average values for the different variables in the previous 30 days before each visit. We considered only  
samples for which at least 10 days were included in the calculation.

664 *GCMS.* The relative quantities (RQs) were log<sub>2</sub>-transformed and missing values were imputed with  
the KNN algorithm. Data were normalized using the RUV4 method in the `ruv` R library<sup>56</sup>. RUV4 was  
666 applied to remove sources of technical variability, including batch effect and the signal drift over time.  
Briefly, we used the internal standards (IS) as negative controls,  $k=4$  and a design matrix with  
668 individuals and visits as covariates, in order to estimate the matrix  $W$  of unwanted factors and their  
respective  $\alpha$  coefficients. The number of factors to remove ( $k$ ) was chosen with the `getK` routine, but  
670 was ensured not to exceed 1/3 of the number of the IS. The normalized relative concentrations were  
obtained by subtracting the effect of the  $W$  components from the RQs. The IS values were inspected

672 before and after normalization to ensure a removal of the signal drift over time and a reduction of the  
Coefficient of Variation (CV). Estimation of the Intraclass Correlation Coefficient (ICC) and PCA plots  
674 were also evaluated to inspect the performance of the normalization method.

*LCMS.* The negative and positive modes from LCMS experiments were processed separately.  
676 Unidentified metabolite peaks and metabolites with more than 25% of missing data were removed.  
RQs were log<sub>2</sub>-transformed and missing values were imputed with KNN. RUV<sub>4</sub> adjustment and  
678 inspection of the results were performed as described above with k=2 or k=1 for LCMS-neg and  
LCMS-pos data, respectively.

680 *Autoantibodies.* We considered: continuous Median Fluorescence Intensity (MFI), discrete binned  
and binary (0=undetected, 1=detected) data (see <sup>27</sup>). MFI values were normalized with the Probabilistic  
682 Quotient Normalization<sup>57</sup>, with a median reference profile, and then log<sub>2</sub>-transformed.

*16S rRNAseq.* The ASV count table represents an analogue of the traditional Operational  
684 Taxonomic Unit table. We inspected the taxa prevalence (the number of samples in which a taxon has  
nonzero counts) and the total abundance (sum of the counts in all samples) and the abundance  
686 distribution. Using phyloseq R library, we agglomerated the counts to the genus level, to reduce  
functional redundancy. The genus-level data were filtered to remove taxa with missing phylum  
688 annotation, prevalence  $\leq 2$  and total abundance  $\leq 10$ . We inspected the ordination of the samples using  
several distance metrics. We then converted the genus-level count to a DESeq2 dataset and used the  
690 Variance Stabilizing Transformation (VST), which normalizes with respect to the library size and gives  
a matrix of approximately homoscedastic values that can be used for downstream analyses. As a  
692 major source of batch effect was represented by the experimental plate, we verified that the VST  
conversion also reduced the library size effect by visualizing the sample ordination, using MDS with  
694 Bray-Curtis distance for the genus-level counts and Euclidean distance for the VST values. We also  
formally tested the reduction of the batch effect, by looking at the association between the first two  
696 axes of the sample ordination plots with the plate ID. The estimation of the  $\alpha$ -diversity for each sample  
was done using the original unfiltered counts.

## 698 ***Integration of multiomics experiments***

A MultiAssayExperiment object was assembled with all the continuous clinical and omics data,  
700 namely RUV4-normalized data for GCMS, LCMS-neg and LCMS-pos, log2MFI for autoantibodies, NPX  
values for PEA assays and VST-transformed values for 16S counts. Data filtering to remove unwanted  
702 features included: removal of internal standards from GCMS and LCMS; removal of proteins NPX  
values < LOD (i.e. missing data) in more than 25% of the samples; removal of FS, CCL22 and BDNF  
704 (technical issues, Olink communication); removal of autoantibodies with background fluorescence in  
all samples (scored reactivity values  $\leq 0.5$ ); removal of bacterial taxa with a prevalence  $\leq 30\%$ . We used  
706 the filtered object for all the downstream analyses. The resulting dataset included 136 GCMS  
metabolites, 104 LCMS-neg metabolites, 163 LCMS-pos metabolites, 174 autoantibodies, 501  
708 proteins and 85 bacterial taxa (Supplementary table 2).

### ***Variance partition analysis***

710 For each omics type, between- and within-individual variation was inspected with a distance-  
based method and with variance partitioning analysis. For the distance method, Euclidean distance  
712 between all pairs of samples was calculated. Then, the within-individual distance was calculated as  
the median value of the distance values of the sample pairs from the same individual. This value was  
714 plotted together with the distribution of the remaining distance values, i.e. the distances between one  
individual and the rest of the individuals. For the variance partitioning method, a linear mixed model  
716 was fitted with lme4 R library, independently to each feature with nonzero variance. We included the  
individual as a random intercept and age, sex and time point (0-4) as fixed effects. The fixed effect  
718 variance, random intercept variance and residual variance components were extracted, and the  
relative fraction calculated. The random intercept variance represented the between-individual  
720 variance, while we interpreted the residual variance as the within-individual variance not accounted by  
the fixed effects.

722

## ***Multi-Omics Factor Analysis***

724 Multi-Omics Factor Analysis v2 (MOFA+) provides a set of factors that capture biological and  
technical sources of variability<sup>11,12</sup>. It infers the axes of heterogeneity that are shared across multiple  
726 modalities and those specific to individual data modalities. We used the “intercept\_factor” branch of  
the code repository ([https://github.com/bioFAM/MOFA2/tree/intercept\\_factor](https://github.com/bioFAM/MOFA2/tree/intercept_factor)). For training, we  
728 selected the samples that had a measurement in all the omics layers (n=359). We considered a  
Gaussian likelihood for the continuous measurements for all the layers, except for autoantibodies,  
730 which were considered in their binary form (0=undetected, 1=detected) with Bernoulli likelihood. Data  
were not scaled. We trained 10 alternative models in Python with a random seed, starting from 20  
732 factors and the following options: iter=”10000”, convergence\_mode=”medium”, dropR2=”0.02”. The  
model with the best value of the Evidence Lower Bound (ELBO) was selected. We checked the  
734 robustness of the learned factors by inspecting the Pearson correlation between the factors obtained  
by all the runs (Supplementary Figure 6). We then computed the fraction of the total variance explained  
736 by each factor and the fraction of variance explained by each factor in each layer. We inspected the  
factor loadings to understand the contribution of the original features. A feature with a higher absolute  
738 loading has a higher weight on the factor, but because the loadings are not directly comparable, their  
scaled values were used for visualization. The sign of the loading defines a direct (positive) or inverse  
740 (negative) proportionality with the corresponding factor, and features with similar loadings contribute  
similarly to the factor. We inspected the factor values and to visualize and cluster the samples on the  
742 reduced space.

## ***Association between factors and phenotypic variables***

744 In order to test the association between the MOFA+ factors and the sample characteristics, we  
gathered a collection of phenotypic information including: clinical variables; questionnaire data (family  
746 history, exercise and physical activity, functional capacity and health, mental health, diet, smoking,  
alcohol use and sleep habits); Healthy Food Intake Index; KardioKompassi risk; sleep apnea score;

748 stress scores; fitness tests; sleep and activity summaries from the wearables. For each combination  
of factor and phenotypic variables, we fitted a linear model with the factor values as outcome and the  
750 phenotypic variable as predictor. Reported  $R^2$  values were derived from these models. For the  
categorical variables, the predictor was considered an ordered factor if the factor levels corresponded  
752 to ordered levels and the variable could be considered as a qualitative or semi-quantitative ordinal  
variable. A False Discovery Rate (FDR) was calculated using the Benjamini-Hochberg method. The  
754 candidate associations for further screening were obtained at  $FDR < 0.05$ , while the associations  
reported in Figure 3 satisfy a  $FDR < 0.001$  threshold, in order to better control for false positives arising  
756 from the multiple hypotheses tested. The selected associations were refined with linear mixed models  
as implemented in lme4 library. We modelled the LF values with the individual as a random intercept  
758 and age and sex as fixed effect. We refer to these models as the covariate-adjusted models. P-values  
for these models were obtained with the “Type II ANOVA” as implemented in the `Anova` function in  
760 the car library, with a Kenward-Roger F test.

### ***Population stratification***

762 The DHR and the 1000 Genome phase 3 genotypes were merged. Analyses were done with PLINK  
v1.9. Only autosomal biallelic SNPs with genotyping rate  $> 95\%$  and  $MAF > 5\%$ . were considered. A set  
764 SNPs in approximate Linkage Disequilibrium was obtained with the option `--indep-pairwise 50 5 0.2`  
and PCA was performed. To predict the ethnicity, a Linear Discriminant Analysis model (`lda` in MASS)  
766 was trained in R with the PCA scores of the 1000 Genomes only and tested on the DHR samples.

### ***GWAS summary scores***

768 We considered 146 traits from the GWAS catalog v1.0.1 (<https://www.ebi.ac.uk/gwas/>) for  
selected ontology categories: body measurement, cardiovascular disease, cardiovascular  
770 measurement, hematological measurement, inflammatory measurement, lipid or lipoprotein  
measurement, liver enzyme measurement, metabolic disorder and other (fasting blood glucose,  
772 vitamin D levels and thyroid stimulating hormone). For each trait, only the studies meeting the following

criteria were considered: at least one SNP with  $p\text{-value} < 1E-08$ , sample size  $> 5000$ , at least 10 SNPs  
774 reported. The study with the largest sample size was considered for the traits with multiple associated  
studies. For each biallelic SNPs, the reported effect size of the risk allele was considered as a weight.  
776 Summary scores were computed by multiplying the imputed genotype dosage of each risk allele times  
its respective weight and summing across all SNPs.

## 778 ***Between- and within-individual cross correlation network***

We considered the continuous measurements for all the omics layers, together with a collection  
780 of measurements including: GWAS summary scores; gut microbiome alpha diversity; clinical variables;  
questionnaire data; Healthy Food Intake Index; KardioKompassi risk; sleep apnea score; stress scores;  
782 fitness tests; sleep and activity summaries. The resulting dataset was preprocessed by regressing out  
the effect of sex and then the effect of age for each variable, only if significantly associated. For the  
784 between-individual cross correlation network calculation, the observations were grouped by individual  
and averaged, obtaining 96 independent observations for each of the 1394 variables. Spearman  
786 correlation was calculated for each pair of variables, resulting in 731318 nonmissing estimated  $\rho$   
coefficients,  $p$ -values and Benjamini-Hochberg adjusted  $p$ -values (FDR), for the pairs of features of  
788 different types (activity and sleep, autoantibody, clinical variables, fitness test, genetic, HFII,  
KardioKompassi, metabolite, microbial, protein, sleep apnea score, stress score). For the within-  
790 individual cross-correlation network calculation, the GWAS scores and the autoantibody data were  
excluded, resulting in 1058 variables, 96 individuals and 5 time points. We used `rmcorr` library<sup>58</sup> to  
792 estimate the common within-individual association for grouped values measured at the five visits.  
`rmcorr` estimates a common regression slope representing the association shared among individuals  
794 and provides the best linear fit for each individual using parallel regression lines with different  
intercepts. The repeated-measures correlation coefficient ( $r_{rm}$ ) is similar to the Pearson correlation  
796 coefficient and measures the strength of a linear association but, unlike Pearson correlation, it takes  
into account non-independence between the measures. Hence, we estimated 347640 nonmissing  $r_{rm}$ ,  
798  $p$ -values and Benjamini-Hochberg adjusted  $p$ -values (FDR), for the pairs of features of different types



and with at least 100 nonmissing pairs of values. For downstream analysis, we selected the  
800 associations satisfying the condition  $FDR < 0.05$  and  $\text{coefficient} > 0.3$  ( $\rho$  or  $r_m$ ) and generated two  
annotated correlation networks. Communities were extracted with the Louvain method, resulting in  
802 modularity values of 0.70 and 0.69 for the between- and within-individuals correlation network  
respectively.

804

806

**Supplementary Table 1. Characteristics of the study cohort.**

|                                                                                                                                    | <b>Unit</b>                       | <b>Value at baseline (n=96)</b> |
|------------------------------------------------------------------------------------------------------------------------------------|-----------------------------------|---------------------------------|
| <b>Age</b>                                                                                                                         | years (mean $\pm$ SE)             | 40.9 $\pm$ 0.9                  |
| <b>Sex</b>                                                                                                                         | counts (M/F)                      | 30/66                           |
| <b>BMI</b>                                                                                                                         | kg/m <sup>2</sup> (mean $\pm$ SE) | 24.9 $\pm$ 0.5                  |
| <b>Alcohol consumption</b>                                                                                                         | g ethanol/week<br>(mean $\pm$ SE) | 53.1 $\pm$ 5.4                  |
| <b>Current smokers<sup>1</sup></b>                                                                                                 | %                                 | 16 <sup>2</sup>                 |
| <b>Education &gt;12 years</b>                                                                                                      | %                                 | 87                              |
| <b>Physical exercise <math>\geq</math>3 times/week</b>                                                                             | %                                 | 56                              |
| <b>Married or cohabiting</b>                                                                                                       | %                                 | 67                              |
| <b>Hypercholesterolemia</b><br>(Total cholesterol >5 mmol/l)                                                                       | %                                 | 44                              |
| <b>Hypertriglyceridemia</b><br>(Females: 20-30 y, >1.5; 30-50 y, >1.7; >50 y, >2 mmol/l<br>Males: 20-30 y, >1.7; >30 y, >2 mmol/l) | %                                 | 4                               |
| <b>Overweight or obesity</b><br>(BMI >25 kg/m <sup>2</sup> )                                                                       | %                                 | 38                              |
| <b>Elevated blood pressure</b><br>(SBP >130 mmHg)                                                                                  | %                                 | 31                              |
| <b>Low vitamin D</b><br>(Serum 25(OH)D <50 nmol/l)                                                                                 | %                                 | 31                              |
| <b>Hyperglycemia</b><br>(Fasting blood glucose >6 nmol/l)                                                                          | %                                 | 8                               |
| <b>Anemia</b><br>(Hb <117 (F) or Hb <134 (M) g/l)                                                                                  | %                                 | 2                               |
| <b>Self-reported obstructive sleep apnea</b>                                                                                       | %                                 | 2                               |

808

810

<sup>1</sup> Participants who reported regular smoking were defined as current smokers.

<sup>2</sup> n=94

**Supplementary Table 2. List of all the included features and their annotation.**

812 (see separate Excel file)

814

**Supplementary Table 3. Results from the GEE model.**

|                                    | <b>Estimate</b> | <b>Units</b> | <b>CI</b>       | <b>P-value</b> | <b>FDR</b> | <b>Type</b> | <b># of OORB</b> |
|------------------------------------|-----------------|--------------|-----------------|----------------|------------|-------------|------------------|
| <b>Hip circumference</b>           | -0.667          | cm           | -0.957 – -0.377 | 6.34E-06       | 8.87E-05   | All         | 1                |
| <b>Serum 25(OH)D</b>               | 4.072           | nmol/l       | 2.336 – 5.808   | 4.29E-06       | 8.87E-05   | OORB        | 24               |
| <b>Systolic blood pressure</b>     | -3.078          | mmHg         | -4.469 – -1.688 | 1.43E-05       | 1.33E-04   | OORB        | 27               |
| <b>Diastolic blood pressure</b>    | -0.947          | mmHg         | -1.443 – -0.451 | 1.81E-04       | 1.01E-03   | OORB        | 22               |
| <b>Pulse</b>                       | -3.214          | bpm          | -4.876 – -1.551 | 1.52E-04       | 1.01E-03   | OORB        | 9                |
| <b>Total/HDL cholesterol ratio</b> | -0.405          |              | -0.66 – -0.150  | 1.88E-03       | 8.77E-03   | OORB        | 7                |
| <b>LDL cholesterol</b>             | -0.085          | mmol/l       | -0.139 – -0.030 | 2.21E-03       | 8.83E-03   | OORB        | 29               |
| <b>ApoB/ApoA1 ratio</b>            | -0.014          |              | -0.024 – -0.005 | 3.89E-03       | 1.36E-02   | OORB        | 35               |
| <b>Cholesterol</b>                 | -0.084          | mmol/l       | -0.145 – -0.024 | 5.83E-03       | 1.81E-02   | OORB        | 36               |

816        **Supplementary Table 4. Associations between MOFA factor values and phenotypic**  
**variables.**

818        (see separate Excel file)

820        **Supplementary Table 5. Node and Edge tables for the Between- and Within-  
Individual Networks.**

822        (see separate Excel file)

## 824 **References**

- 826 1. Chen, R. *et al.* Personal omics profiling reveals dynamic molecular and medical phenotypes. *Cell* **148**, 1293–1307 (2012).
- 828 2. Chen, R. *et al.* Longitudinal personal DNA methylome dynamics in a human with a chronic condition. *Nat Med* **6**, 1 (2018).
- 830 3. Perkins, B. A. *et al.* Precision medicine screening using whole-genome sequencing and advanced imaging to identify disease risk in adults. *Proc Natl Acad Sci USA* **115**, 3686–3691 (2018).
- 832 4. Piening, B. D. *et al.* Integrative Personal Omics Profiles during Periods of Weight Gain and Loss. *Cell Systems* **6**, 157–170.e8 (2018).
- 834 5. Price, N. D. *et al.* A wellness study of 108 individuals using personal, dense, dynamic data clouds. *Nat Biotechnol* **35**, 747–756 (2017).
- 836 6. Zhou, W. *et al.* Longitudinal multi-omics of host-microbe dynamics in prediabetes. *Nature* **569**, 663–671 (2019).
- 838 7. Schüssler-Fiorenza Rose, S. M. *et al.* A longitudinal big data approach for precision health. *Nat Med* **25**, 792–804 (2019).
- 840 8. Ahadi, S. *et al.* Personal aging markers and ageotypes revealed by deep longitudinal profiling. *Nat Med* **26**, 83–90 (2020).
- 842 9. Tebani, A. *et al.* Integration of molecular profiles in a longitudinal wellness profiling cohort. *Nat Commun* **11**, 1–14 (2020).
- 844 10. Digital Health Revolution. *digitalhealthrevolution.fi* Available at:  
846 [http://www.digitalhealthrevolution.fi/uploads/2/4/1/5/24155377/person\\_centric\\_data\\_management\\_models\\_and\\_opportunities\\_in\\_health\\_care\\_sector\\_full.pdf](http://www.digitalhealthrevolution.fi/uploads/2/4/1/5/24155377/person_centric_data_management_models_and_opportunities_in_health_care_sector_full.pdf). (Accessed: 22nd October 2020)
- 848 11. Argelaguet, R. *et al.* Multi-Omics Factor Analysis—a framework for unsupervised integration of multi-omics data sets. *Mol Syst Biol* **14**, e8124 (2018).
- 850 12. Argelaguet, R. *et al.* MOFA+: a statistical framework for comprehensive integration of multi-modal single-cell data. *Genome Biology*, **21**, 111 (2020).
- 852 13. Considine, R. V. *et al.* Serum immunoreactive-leptin concentrations in normal-weight and obese humans. *N Engl J Med* **334**, 292–295 (1996).
- 854 14. Juge-Aubry, C. E. *et al.* Adipose tissue is a major source of interleukin-1 receptor antagonist: upregulation in obesity and inflammation. *Diabetes* **52**, 1104–1110 (2003).
- 856 15. Zheng, Z. *et al.* Interacting hepatic PAI-1/tPA gene regulatory pathways influence impaired fibrinolysis severity in obesity. *J. Clin. Invest.* **130**, 4348–4359 (2020).
- 858 16. Xu, A. *et al.* Adipocyte fatty acid-binding protein is a plasma biomarker closely associated with obesity and metabolic syndrome. *Clinical Chemistry* **52**, 405–413 (2006).
- 860 17. Fisher, F. M. *et al.* Obesity is a fibroblast growth factor 21 (FGF21)-resistant state. *Diabetes* **59**, 2781–2789 (2010).
- 862 18. Mayne, J. *et al.* Associations Between Soluble LDLR and Lipoproteins in a White Cohort and the Effect of PCSK9 Loss-of-Function. *J. Clin. Endocrinol. Metab.* **103**, 3486–3495 (2018).
- 864 19. Kopchick, J. J., Berryman, D. E., Puri, V., Lee, K. Y. & Jorgensen, J. O. L. The effects of growth hormone on adipose tissue: old observations, new mechanisms. *Nat Rev Endocrinol* (2019). doi:10.1038/s41574-019-0280-9
- 868 20. Shih, D. M. *et al.* PON3 knockout mice are susceptible to obesity, gallstone formation, and atherosclerosis. *FASEB J.* **29**, 1185–1197 (2015).
- 870 21. Nam, S. Y. *et al.* Effect of obesity on total and free insulin-like growth factor (IGF)-1, and their relationship to IGF-binding protein (BP)-1, IGFBP-2, IGFBP-3, insulin, and growth hormone. *Int J Obes* **21**, 355–359 (1997).
- 872

- 874 22. Meulenbergh, P. M. M., Ross, H. A., Swinkels, L. M. J. W. & Benraad, T. J. The effect of  
876 oral contraceptives on plasma-free and salivary cortisol and cortisone. *Clinica Chimica*  
*Acta* **165**, 379–385 (1987).
- 878 23. Barsivala, V., Virkar, K. & Kulkarni, R. D. Thyroid functions of women taking oral  
880 contraceptives. *Contraception* **9**, 305–314 (1974).
- 882 24. Hodson, L., Skeaff, C. M. & Fielding, B. A. Fatty acid composition of adipose tissue and  
884 blood in humans and its use as a biomarker of dietary intake. *Progress in Lipid*  
*Research* **47**, 348–380 (2008).
- 886 25. Ussher, J. R., Elmariah, S., Gerszten, R. E. & Dyck, J. R. B. The Emerging Role of  
888 Metabolomics in the Diagnosis and Prognosis of Cardiovascular Disease. *J. Am. Coll.*  
*Cardiol.* **68**, 2850–2870 (2016).
- 890 26. Egan, B. M., Greene, E. L. & Goodfriend, T. L. Nonesterified fatty acids in blood  
892 pressure control and cardiovascular complications. *Curr. Hypertens. Rep.* **3**, 107–116  
(2001).
- 894 27. Neiman, M. *et al.* Individual and stable autoantibody repertoires in healthy individuals.  
*Autoimmunity* **52**, 1–11 (2019).
- 896 28. Rubtsova, K., Rubtsov, A. V., Cancro, M. P. & Marrack, P. Age-Associated B Cells: A T-  
898 bet-Dependent Effector with Roles in Protective and Pathogenic Immunity. *J Immunol*  
**195**, 1933–1937 (2015).
- 900 29. Prentice, K. J. *et al.* CMPF, a Metabolite Formed Upon Prescription Omega-3-Acid  
902 Ethyl Ester Supplementation, Prevents and Reverses Steatosis. *EBioMedicine* **27**, 200–  
213 (2018).
- 904 30. Paige, E. *et al.* Interleukin-6 Receptor Signaling and Abdominal Aortic Aneurysm  
906 Growth Rates. *Circ Genom Precis Med* **12**, e002413 (2019).
- 908 31. Ristagno, G. *et al.* Pentraxin 3 in Cardiovascular Disease. *Front Immunol* **10**, 1357  
910 (2019).
- 912 32. Bonacina, F. *et al.* Pentraxin 3 deficiency protects from the metabolic inflammation  
914 associated to diet-induced obesity. *Cardiovasc Res* **115**, 1861–1872 (2019).
- 916 33. Wilson, A. M. *et al.* Neuropilin-1 expression in adipose tissue macrophages protects  
918 against obesity and metabolic syndrome. *Sci Immunol* **3**, (2018).
- 920 34. Frateschi, S. *et al.* PAR2 absence completely rescues inflammation and ichthyosis  
922 caused by altered CAP1/Prss8 expression in mouse skin. *Nat Commun* **2**, 161 (2011).
- 924 35. Pan, W. & Kastin, A. J. Leptin: a biomarker for sleep disorders? *Sleep Med Rev* **18**,  
926 283–290 (2014).
- 928 36. Ishibashi, Y. *et al.* Serum TFF1 and TFF3 but not TFF2 are higher in women with breast  
930 cancer than in women without breast cancer. *Sci. Rep.* **7**, 4846 (2017).
- 932 37. Floehr, J. *et al.* Association of high fetuin-B concentrations in serum with fertilization  
934 rate in IVF: a cross-sectional pilot study. *Hum. Reprod.* **31**, 630–637 (2016).
- 936 38. Meex, R. C. *et al.* Fetuin B Is a Secreted Hepatocyte Factor Linking Steatosis to  
938 Impaired Glucose Metabolism. *Cell Metab* **22**, 1078–1089 (2015).
- 940 39. Zubair, N. *et al.* Genetic Predisposition Impacts Clinical Changes in a Lifestyle  
942 Coaching Program. *Sci. Rep.* **9**, 6805 (2019).
- 944 40. Walker, C. G. *et al.* Genetic predisposition to an adverse lipid profile limits the  
946 improvement in total cholesterol in response to weight loss. *Obesity (Silver Spring)* **21**,  
2589–2595 (2013).
- 948 41. Okada, Y. & Kamatani, Y. Common genetic factors for hematological traits in humans.  
950 *J. Hum. Genet.* **57**, 161–169 (2012).
- 952 42. Dopico, X. C. *et al.* Widespread seasonal gene expression reveals annual differences in  
954 human immunity and physiology. *Nat Commun* **6**, 7000 (2015).
- 956 43. Lakshmikanth, T. *et al.* Human immune system variation during one year. *bioRxiv* **17**,  
2020.01.22.915025 (2020).
- 958 44. Widén, E. & Ripatti, S. Assessment of multifactorial coronary artery disease by utilizing  
960 genomic data. *Duodecim* **133**, 776–781 (2017).



- 928 45. Niiranen, T. J., Kronholm, E., Rissanen, H., Partinen, M. & Jula, A. M. Self-reported  
obstructive sleep apnea, simple snoring, and various markers of sleep-disordered  
930 46. Meinilä, J. *et al.* Healthy Food Intake Index (HFII) - Validity and reproducibility in a  
932 gestational-diabetes-risk population. - PubMed - NCBI. *BMC Public Health* **16**, 3  
(2016).
- 934 47. Honko, H. *et al.* W2E--Wellness Warehouse Engine for Semantic Interoperability of  
Consumer Health Data. *IEEE J Biomed Health Inform* **20**, 1632–1639 (2016).
- 936 48. Dressendörfer, R. A., Kirschbaum, C., Rohde, W., Stahl, F. & Strasburger, C. J.  
Synthesis of a cortisol-biotin conjugate and evaluation as a tracer in an immunoassay  
for salivary cortisol measurement. *J. Steroid Biochem. Mol. Biol.* **43**, 683–692 (1992).
- 938 49. Pruessner, J. C., Kirschbaum, C., Meinlschmid, G. 2003. Two formulas for computation  
940 of the area under the curve represent measures of total hormone concentration versus  
time-dependent change. *Elsevier* doi:10.1016/S0306-4530(02)00108-7
- 942 50. A, J. *et al.* Extraction and GC/MS analysis of the human blood plasma metabolome.  
*Anal. Chem.* **77**, 8086–8094 (2005).
- 944 51. Schauer, N. *et al.* GC-MS libraries for the rapid identification of metabolites in complex  
biological samples. *FEBS Lett* **579**, 1332–1337 (2005).
- 946 52. Diamanti, K. *et al.* Intra- and inter-individual metabolic profiling highlights carnitine and  
lysophosphatidylcholine pathways as key molecular defects in type 2 diabetes. *Sci.*  
*Rep.* **9**, 1–13 (2019).
- 948 53. Hugerth, L. W. *et al.* No distinct microbiome signature of irritable bowel syndrome  
found in a Swedish random population. *Gut* **69**, 1076–1084 (2020).
- 950 54. Hugerth, L. W. *et al.* DegePrime, a program for degenerate primer design for broad-  
952 taxonomic-range PCR in microbial ecology studies. *Appl Environ Microbiol* **80**, 5116–  
5123 (2014).
- 954 55. Callahan, B. J. *et al.* DADA2: High-resolution sample inference from Illumina amplicon  
data. *Nat Meth* **13**, 581–583 (2016).
- 956 56. Gagnon-Bartsch, J. A., Jacob, L. & Speed T.P. Removing unwanted variation from high  
dimensional data with negative controls. (2013). Available at:  
958 <https://statistics.berkeley.edu/sites/default/files/tech-reports/ruv.pdf> (Accessed: 22nd  
October 2020)
- 960 57. Dieterle, F., Ross, A., Schlotterbeck, G. & Senn, H. Probabilistic quotient normalization  
as robust method to account for dilution of complex biological mixtures. Application in  
1H NMR metabolomics. *Anal. Chem.* **78**, 4281–4290 (2006).
- 962 58. Bakdash, J. Z. & Marusich, L. R. Repeated Measures Correlation. *Front Psychol* **8**, 456  
(2017).
- 964

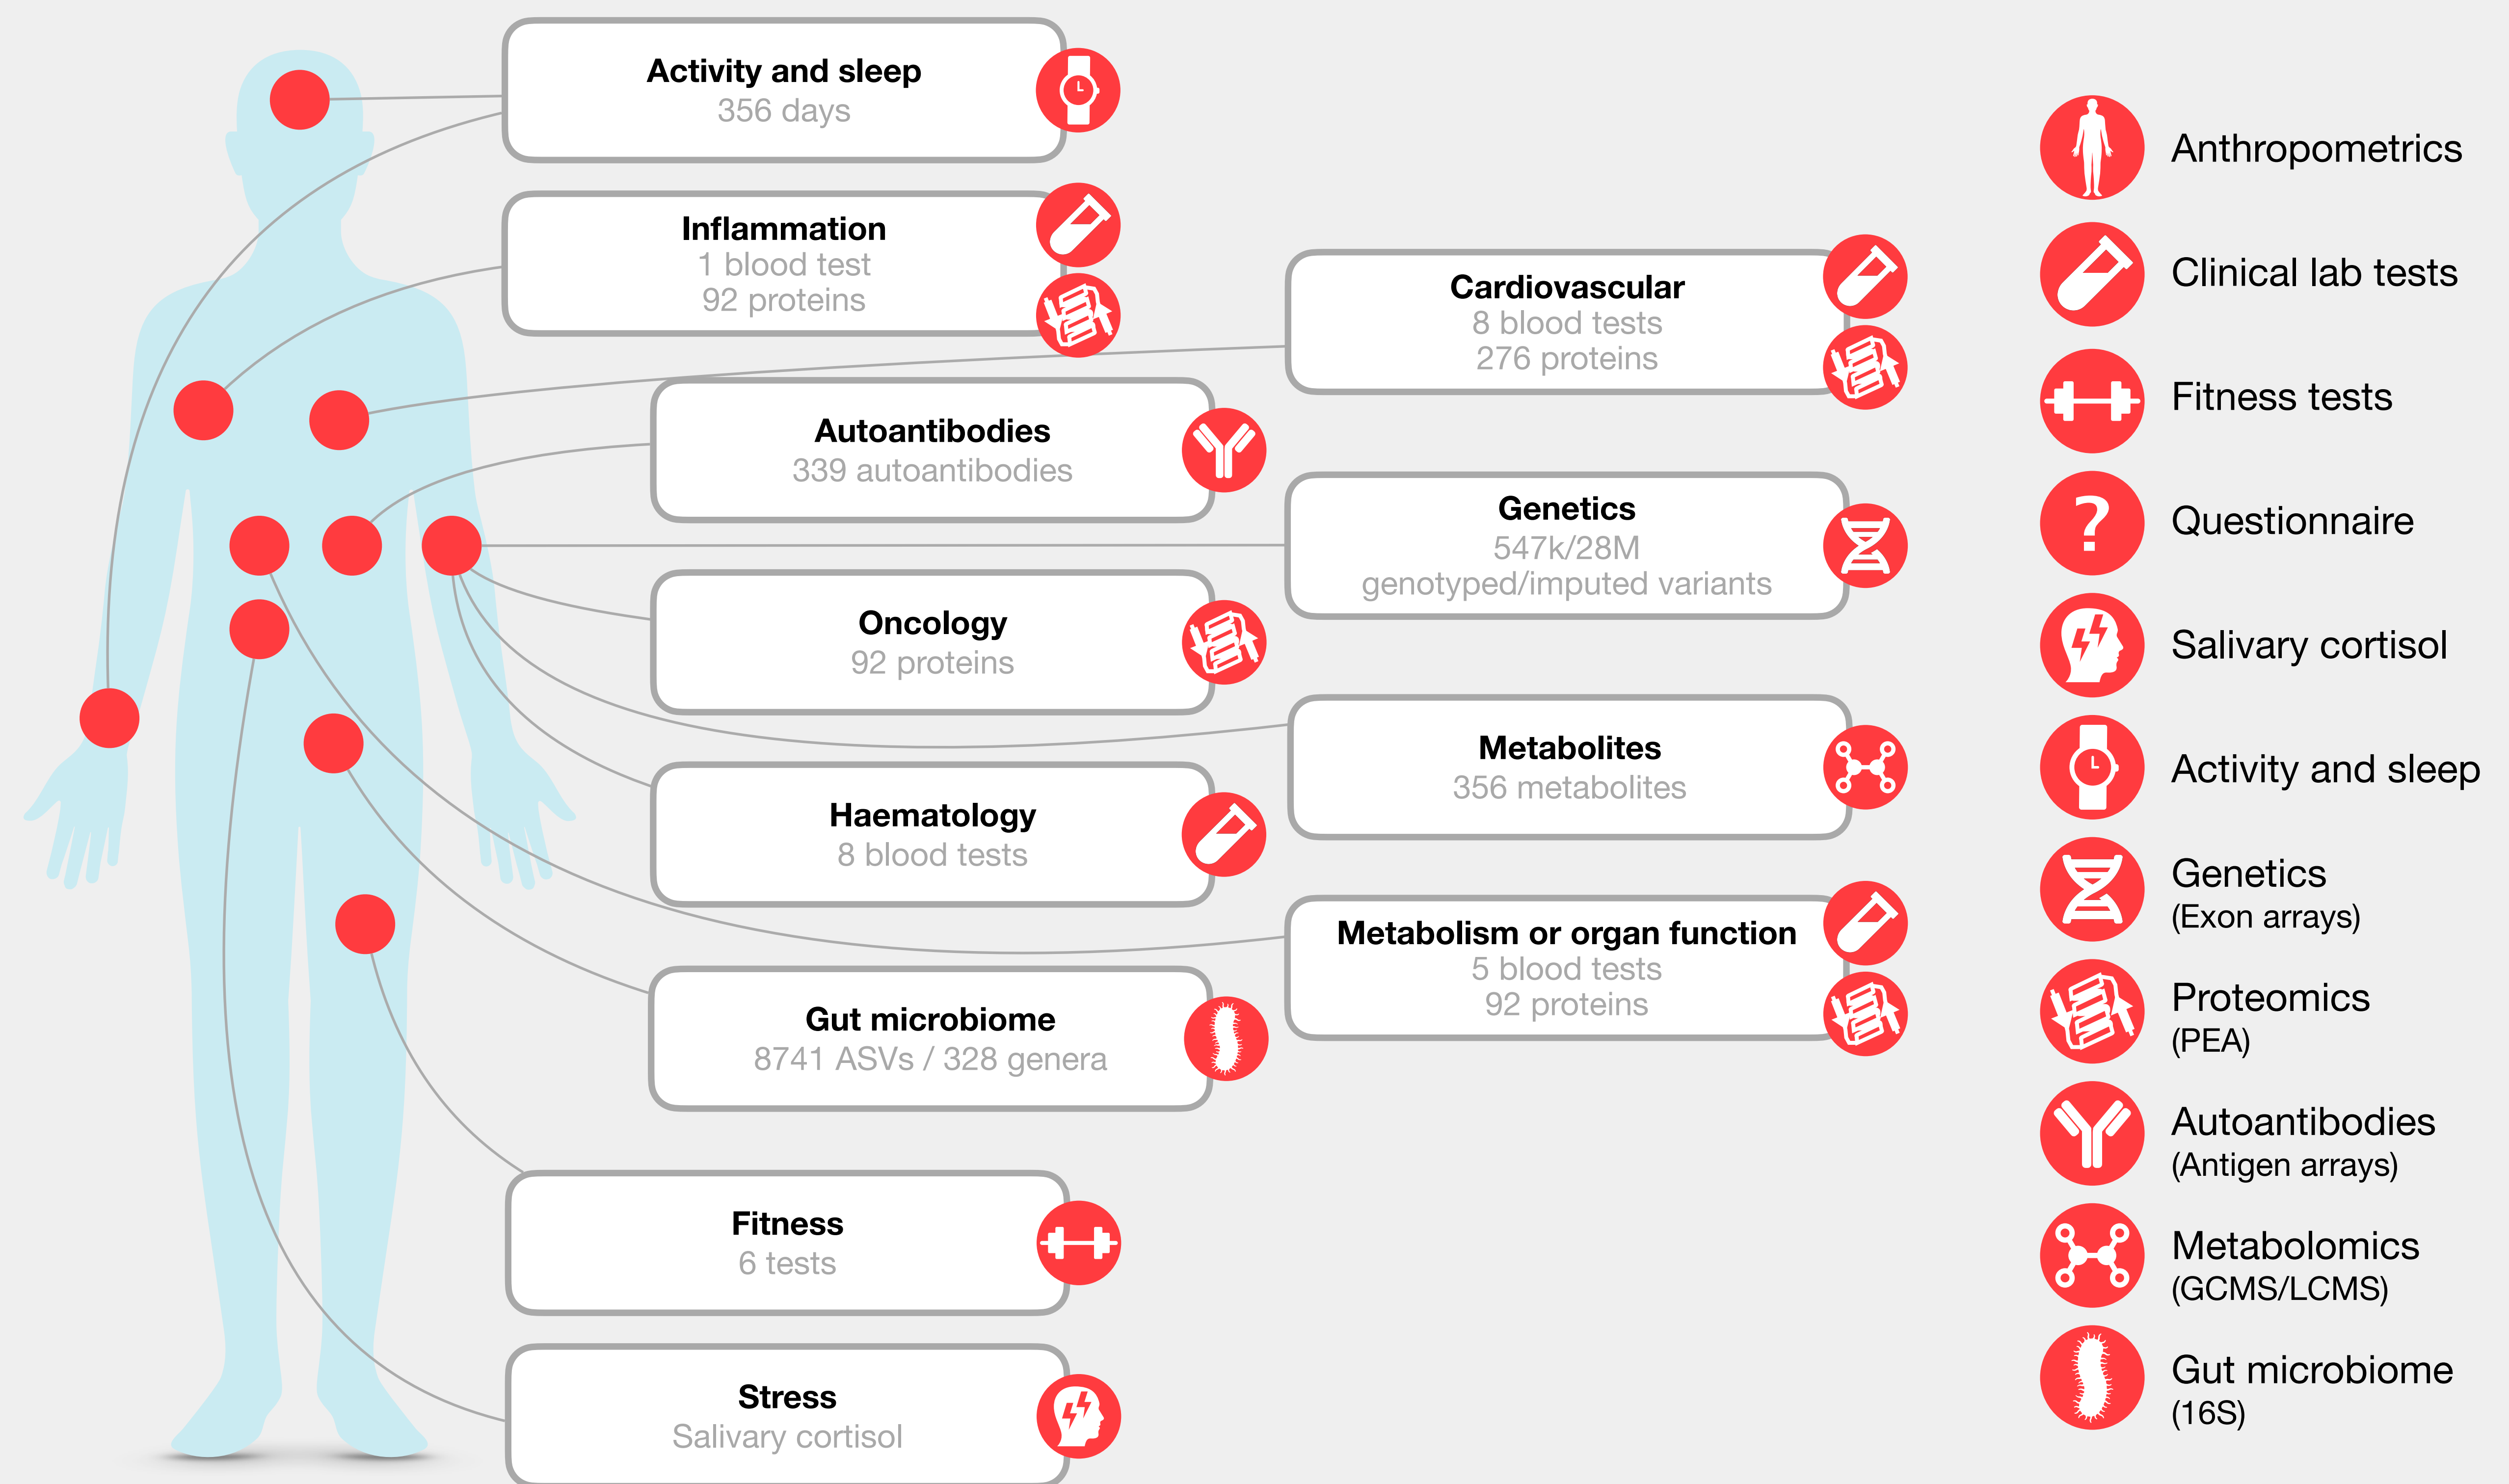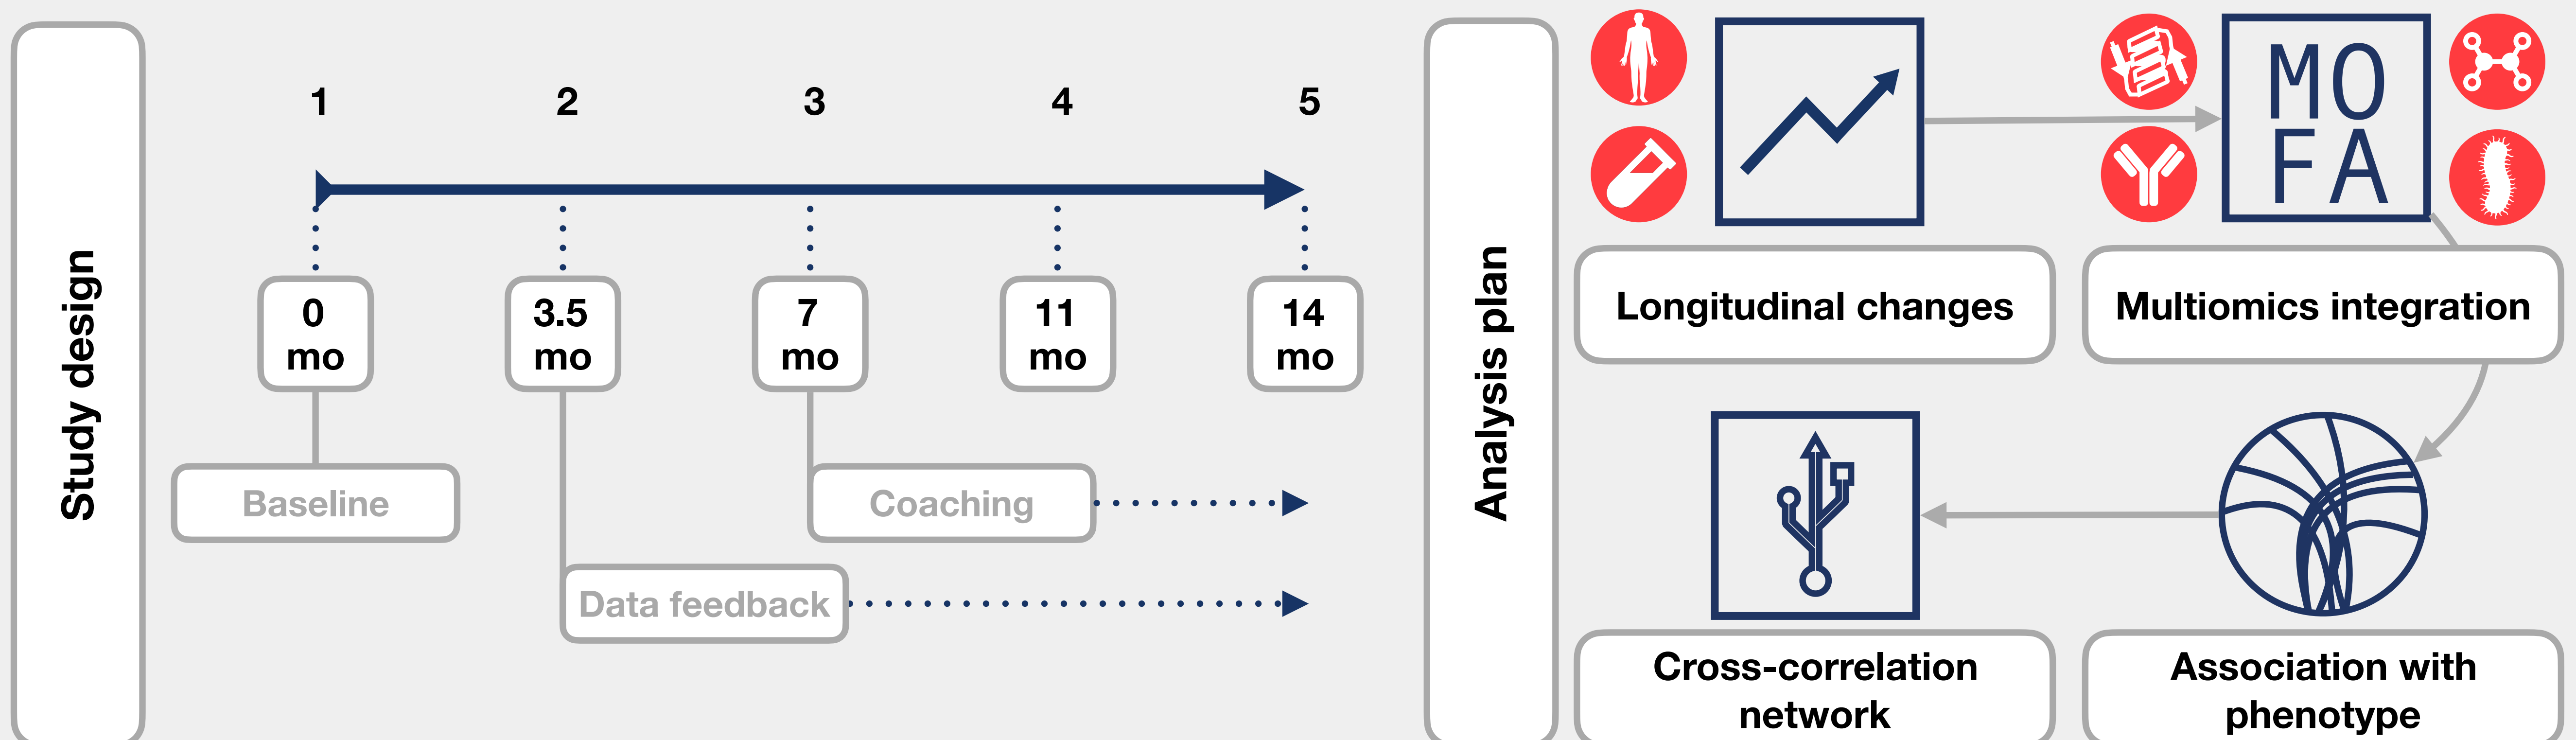

**Figure 1:** Overview of the measured features, longitudinal design and analysis workflow.

**A**

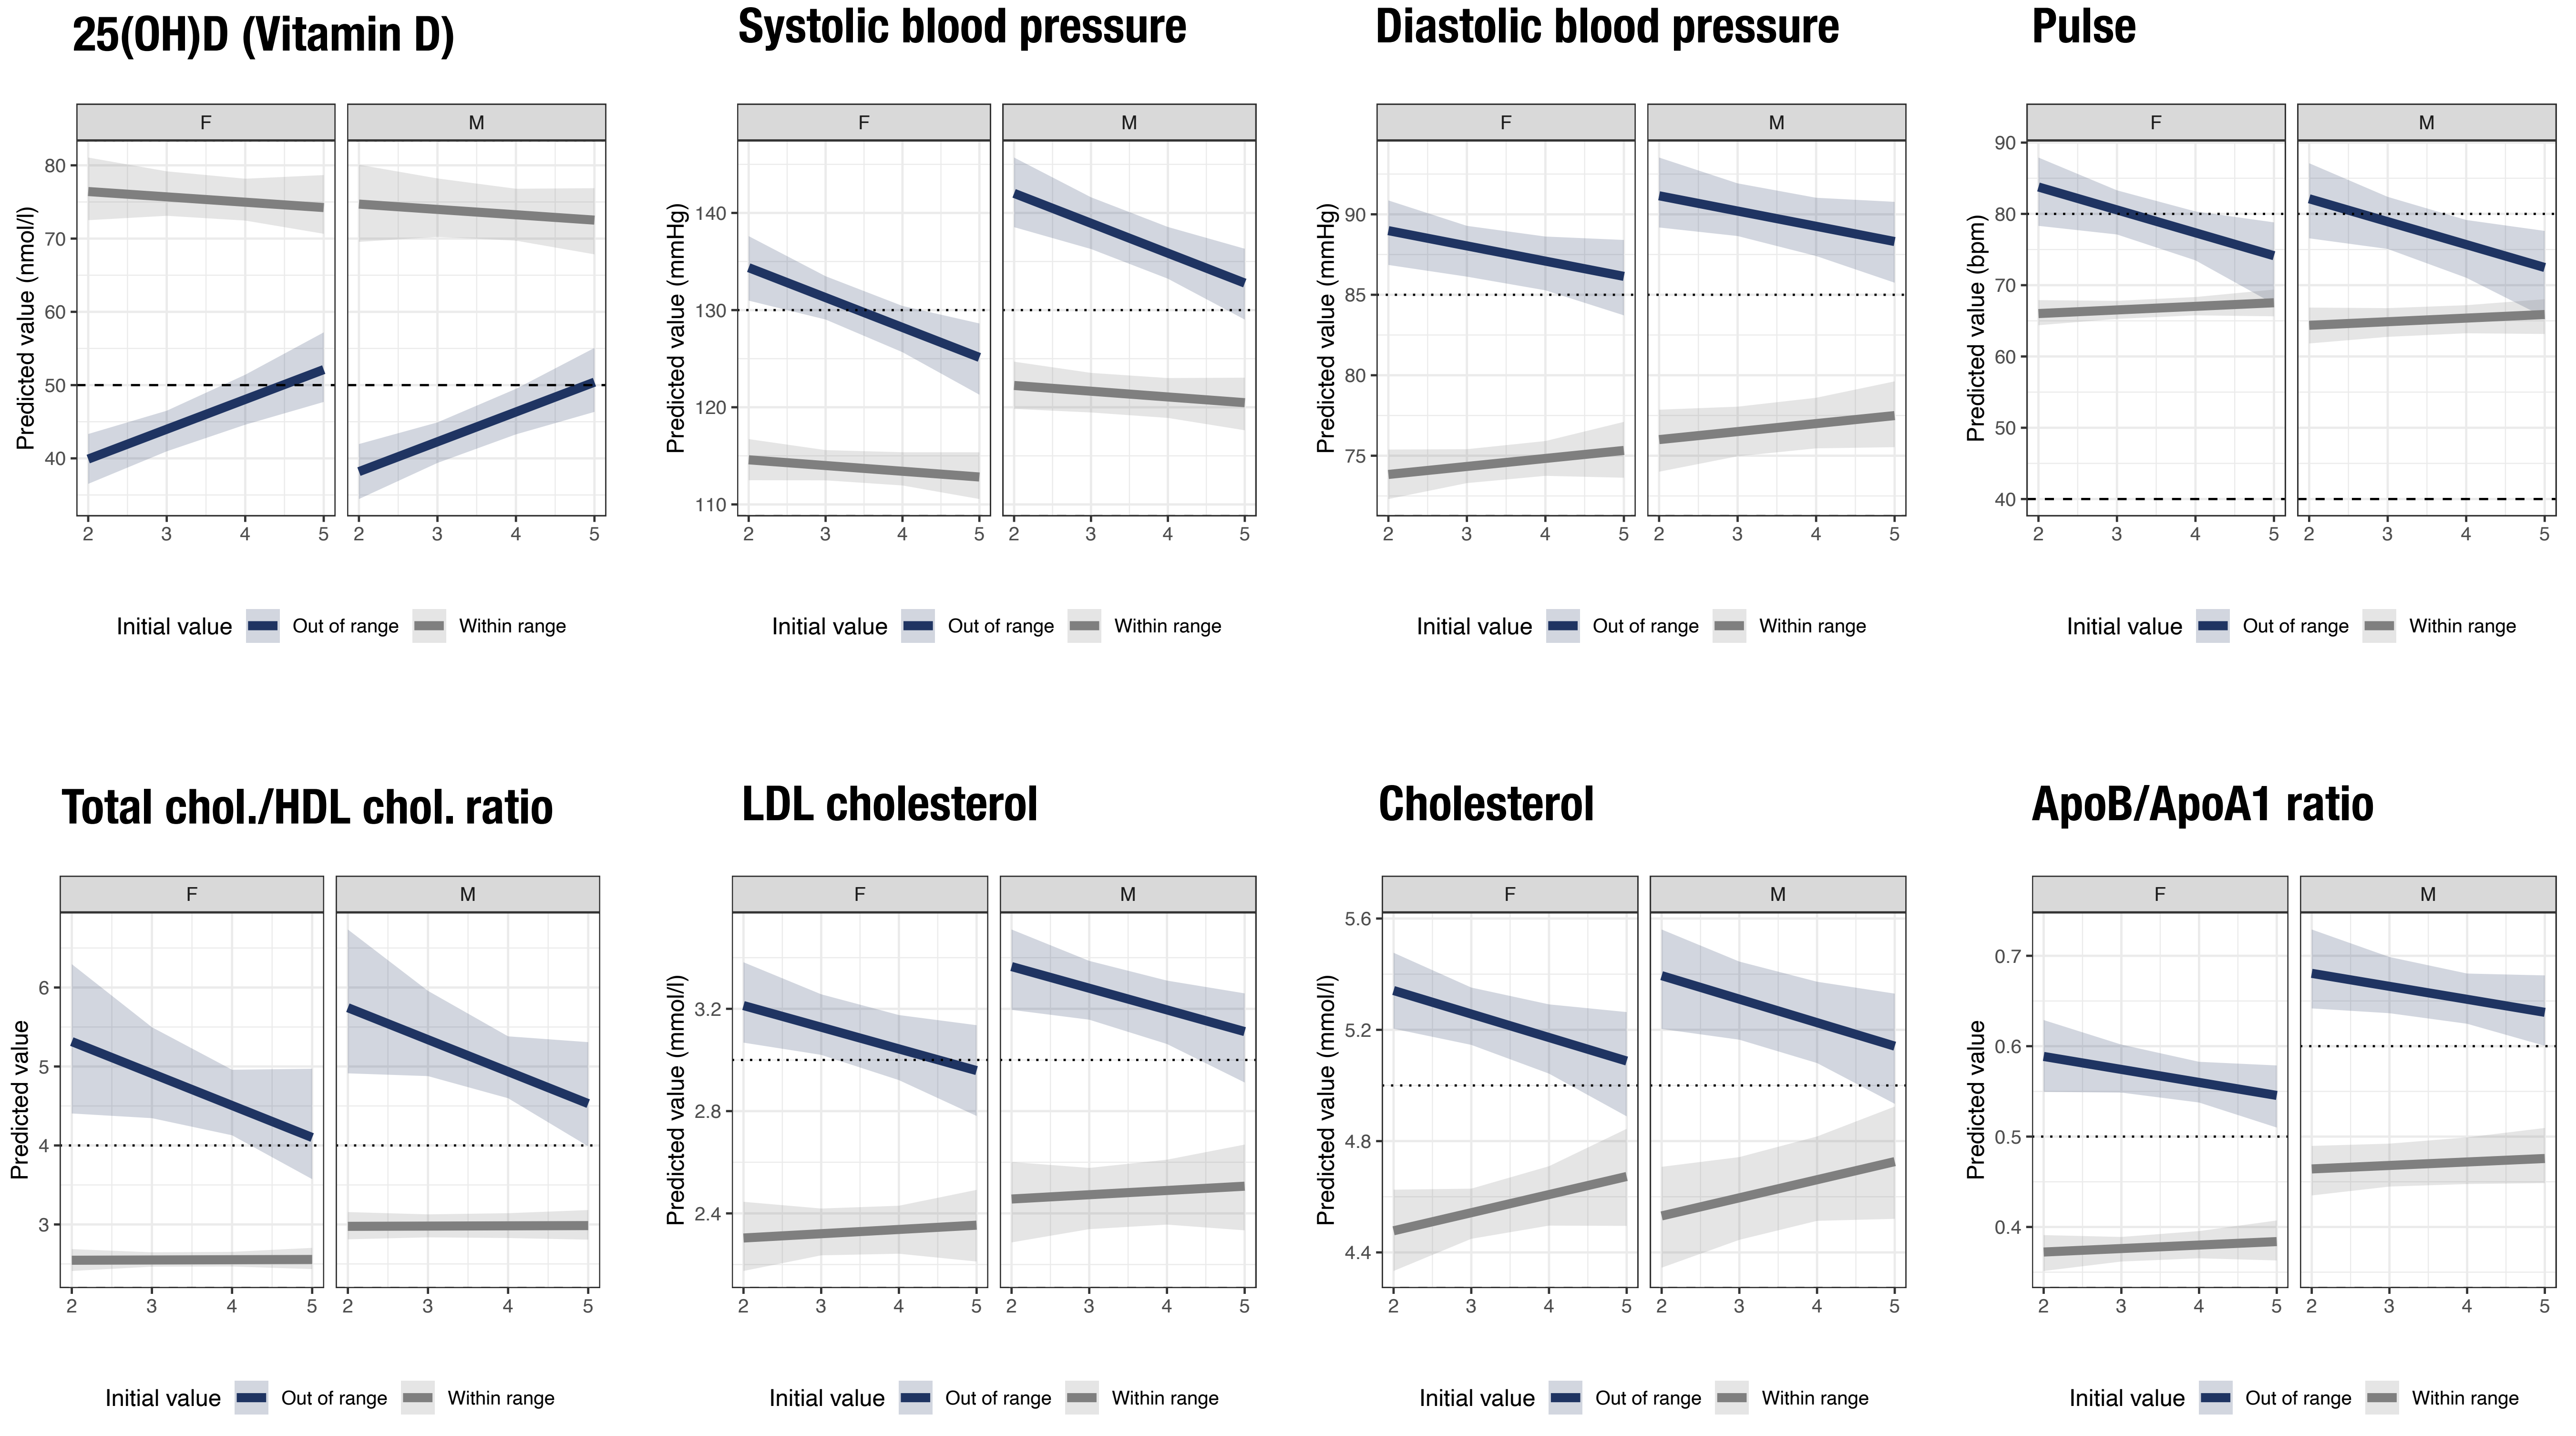

**B**

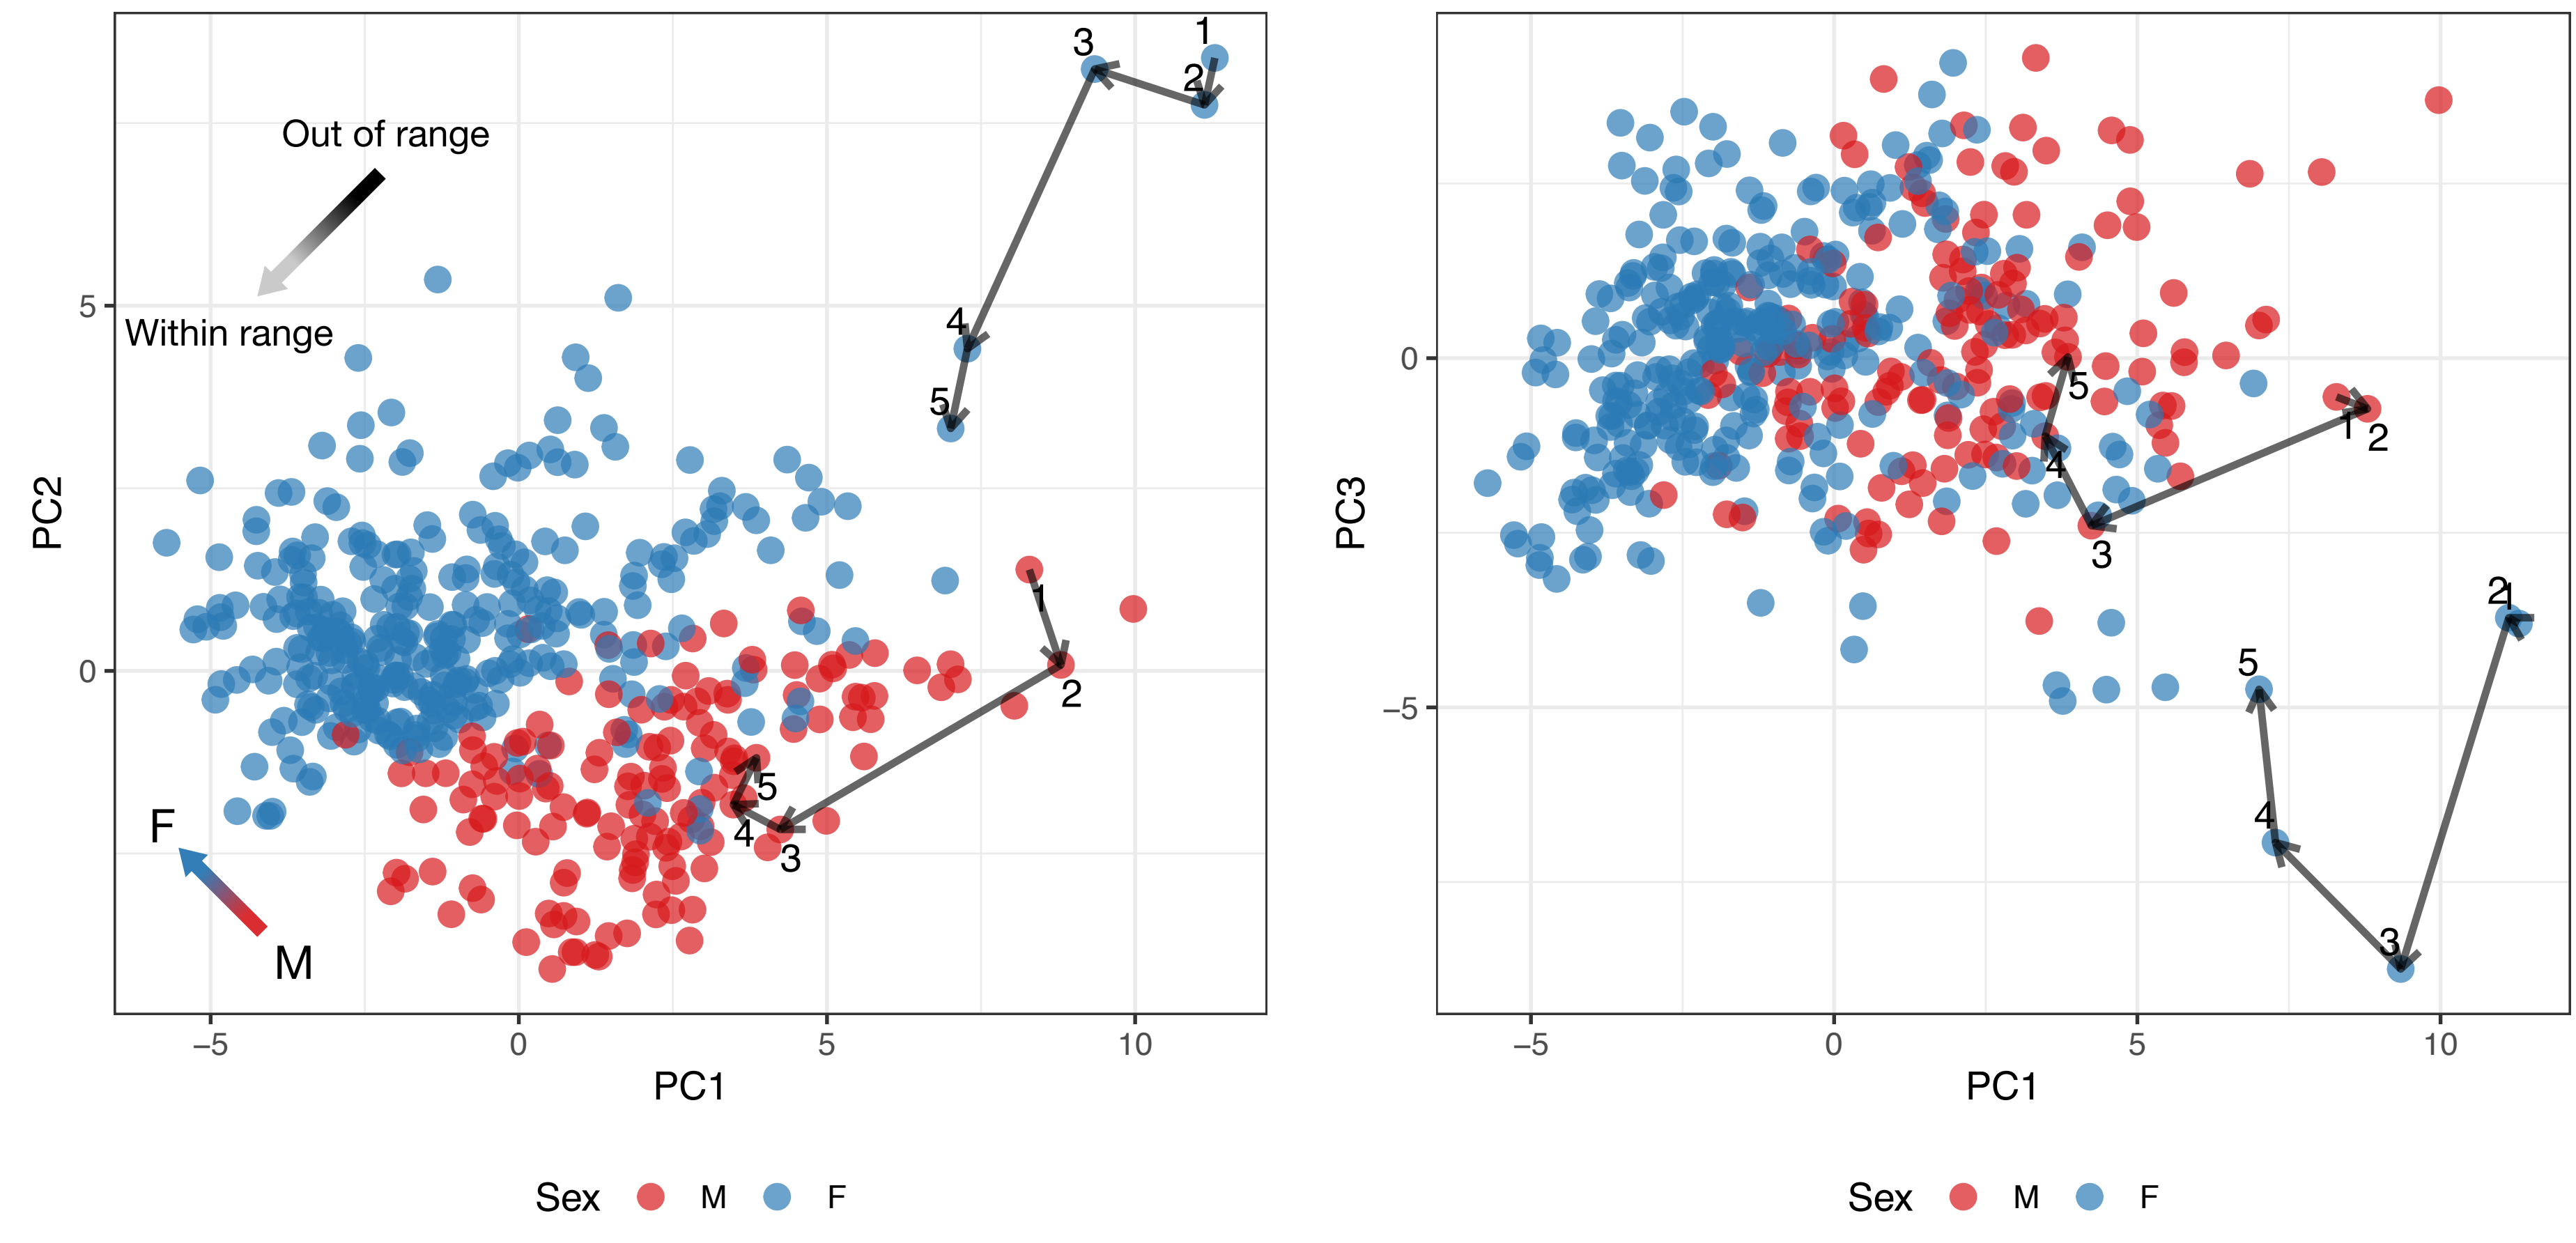

bioRxiv preprint doi: <https://doi.org/10.1101/2020.11.11.365387>; this version posted December 7, 2020. The copyright holder for this preprint (which was not certified by peer review) is the author/funder, who has granted bioRxiv a license to display the preprint in perpetuity. It is made available under aCC-BY-NC-ND 4.0 International license.

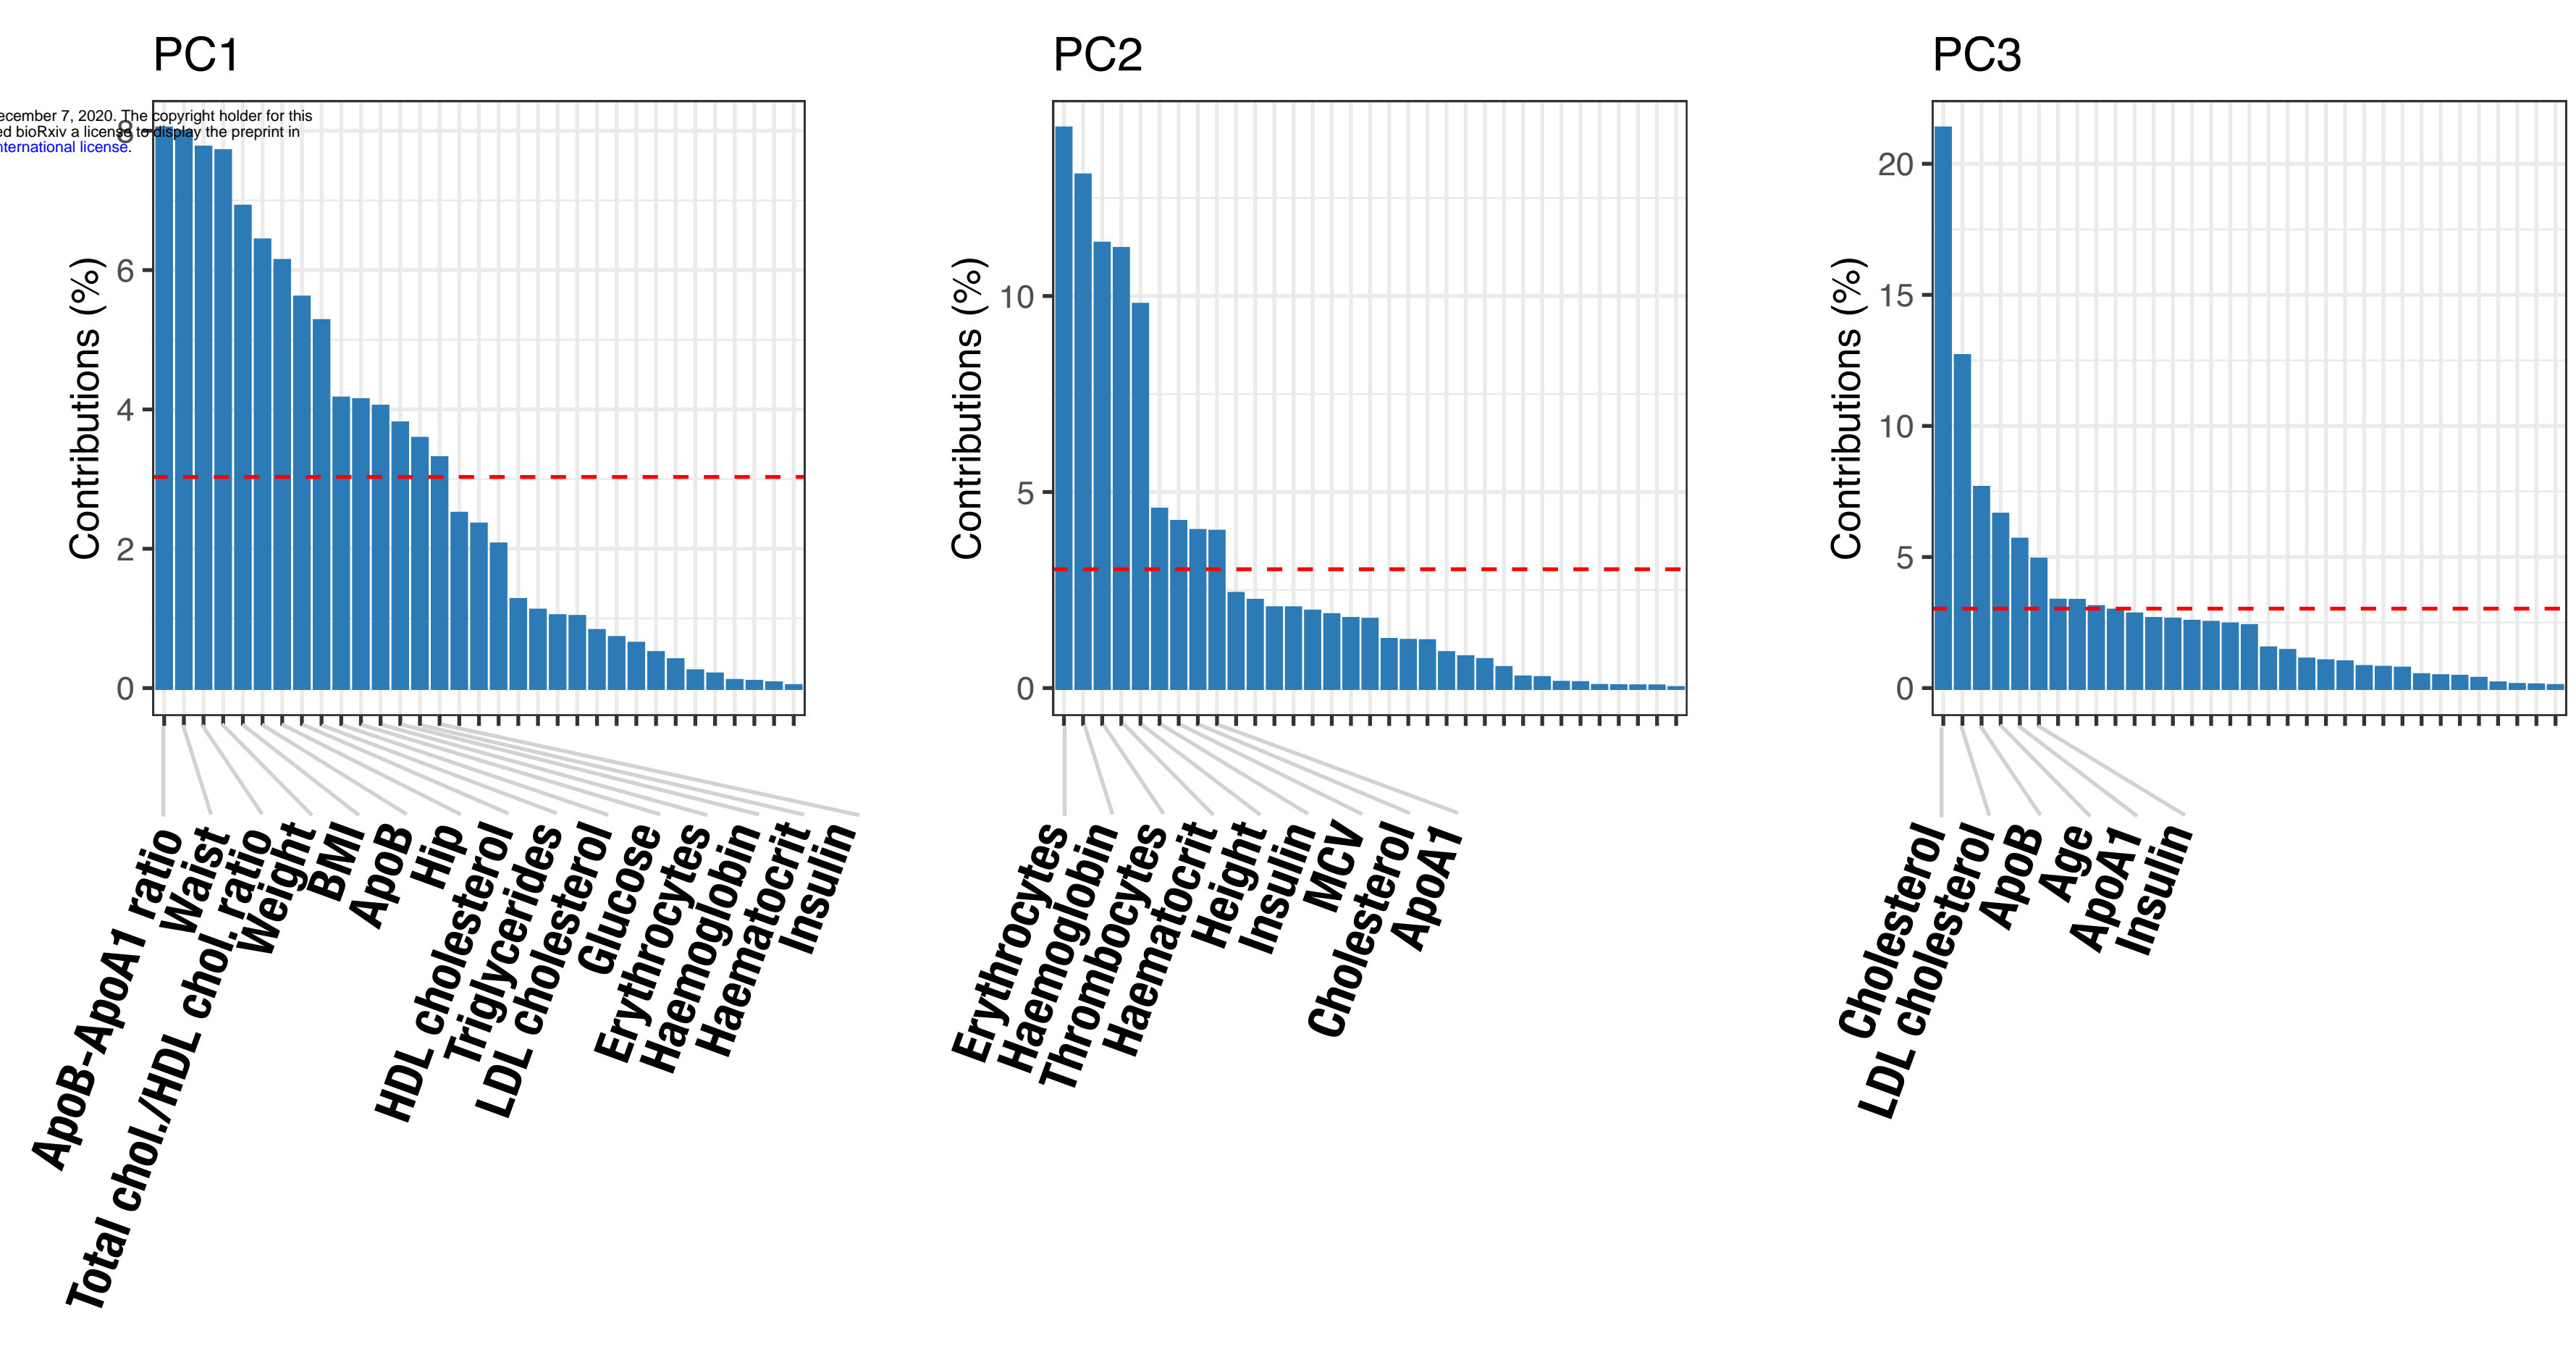

**Figure 2: A.** Longitudinal analysis reveals the positive effect of data feedback and coaching on health. Generalized Estimating Equation (GEE) model prediction for the significantly changed variables (FDR<0.05), stratified by sex and out/within range status at baseline. For this analysis, the second visit represented a baseline because data feedback and coaching started at the 2nd and 3rd visits respectively (grey: within range, blue: out of range). Bootstrapped confidence intervals are shown. **B.** Principal components plot of the individuals obtained using all the numerical clinical variables. The trajectories for two selected individuals along successive study visits are shown with arrows. The loadings for the first three PCs are shown in the bottom panels and the variables with relative contribution higher than average (red line) are named.

**A**

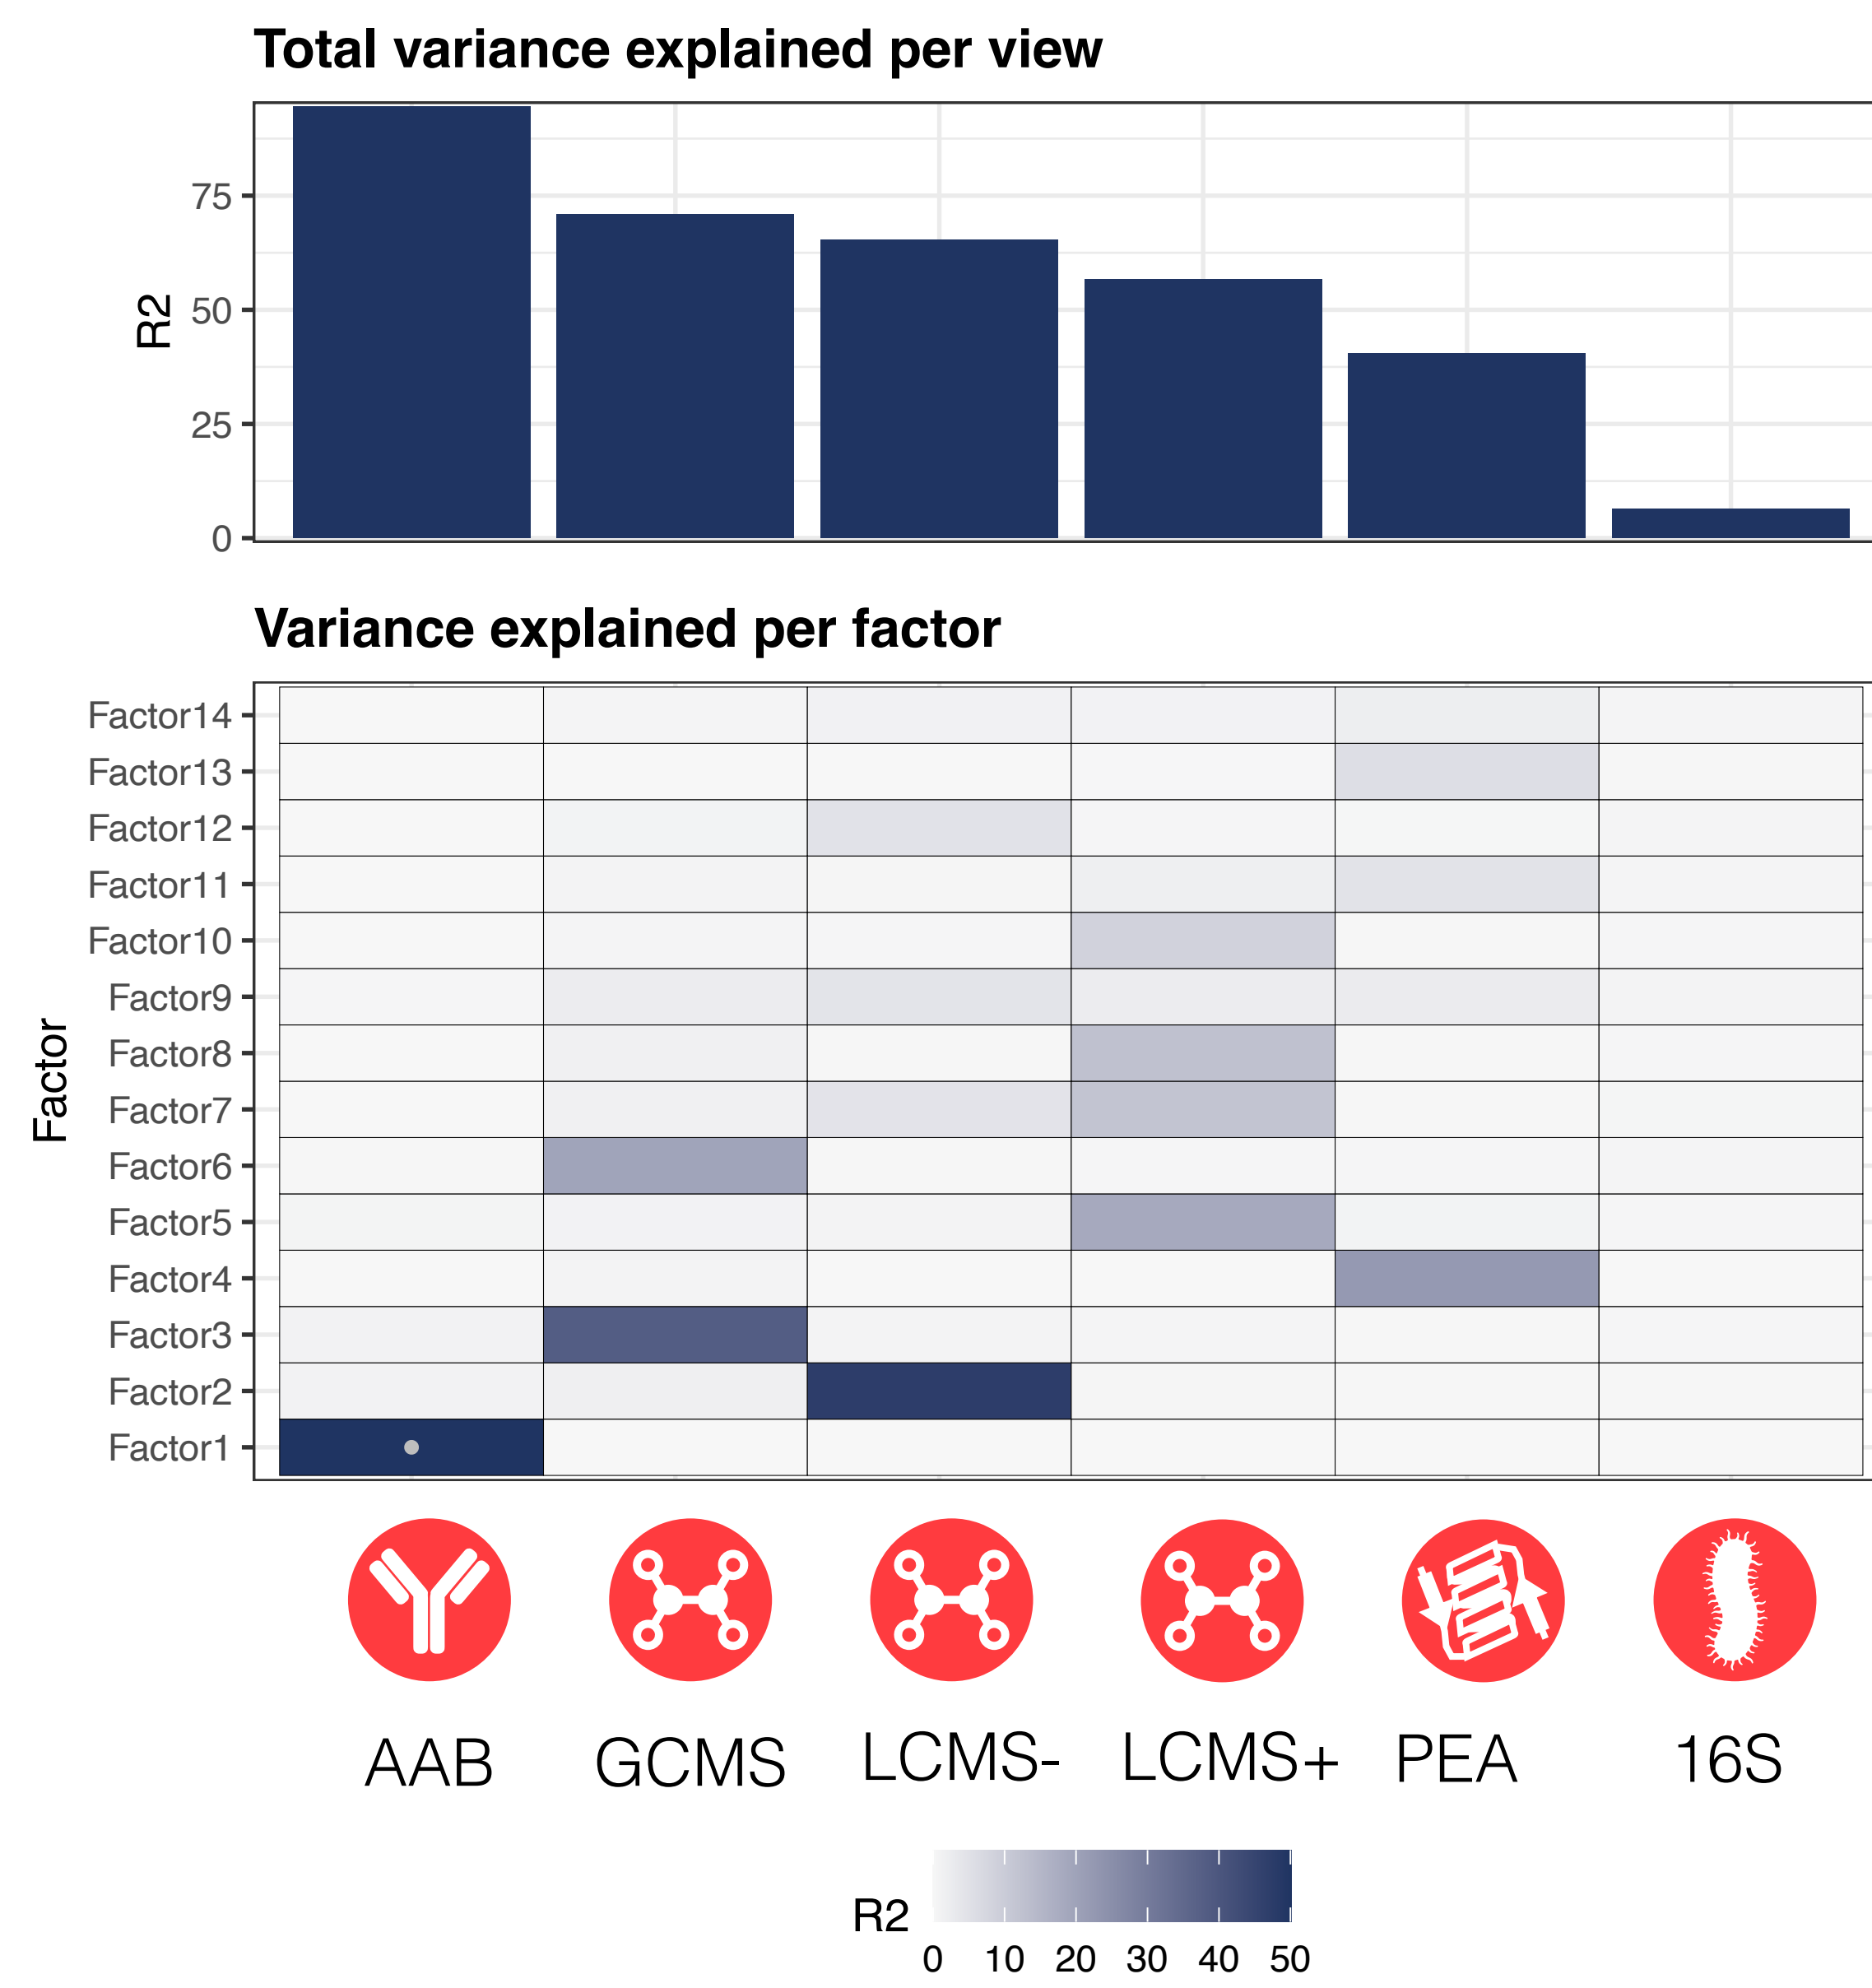

**B**

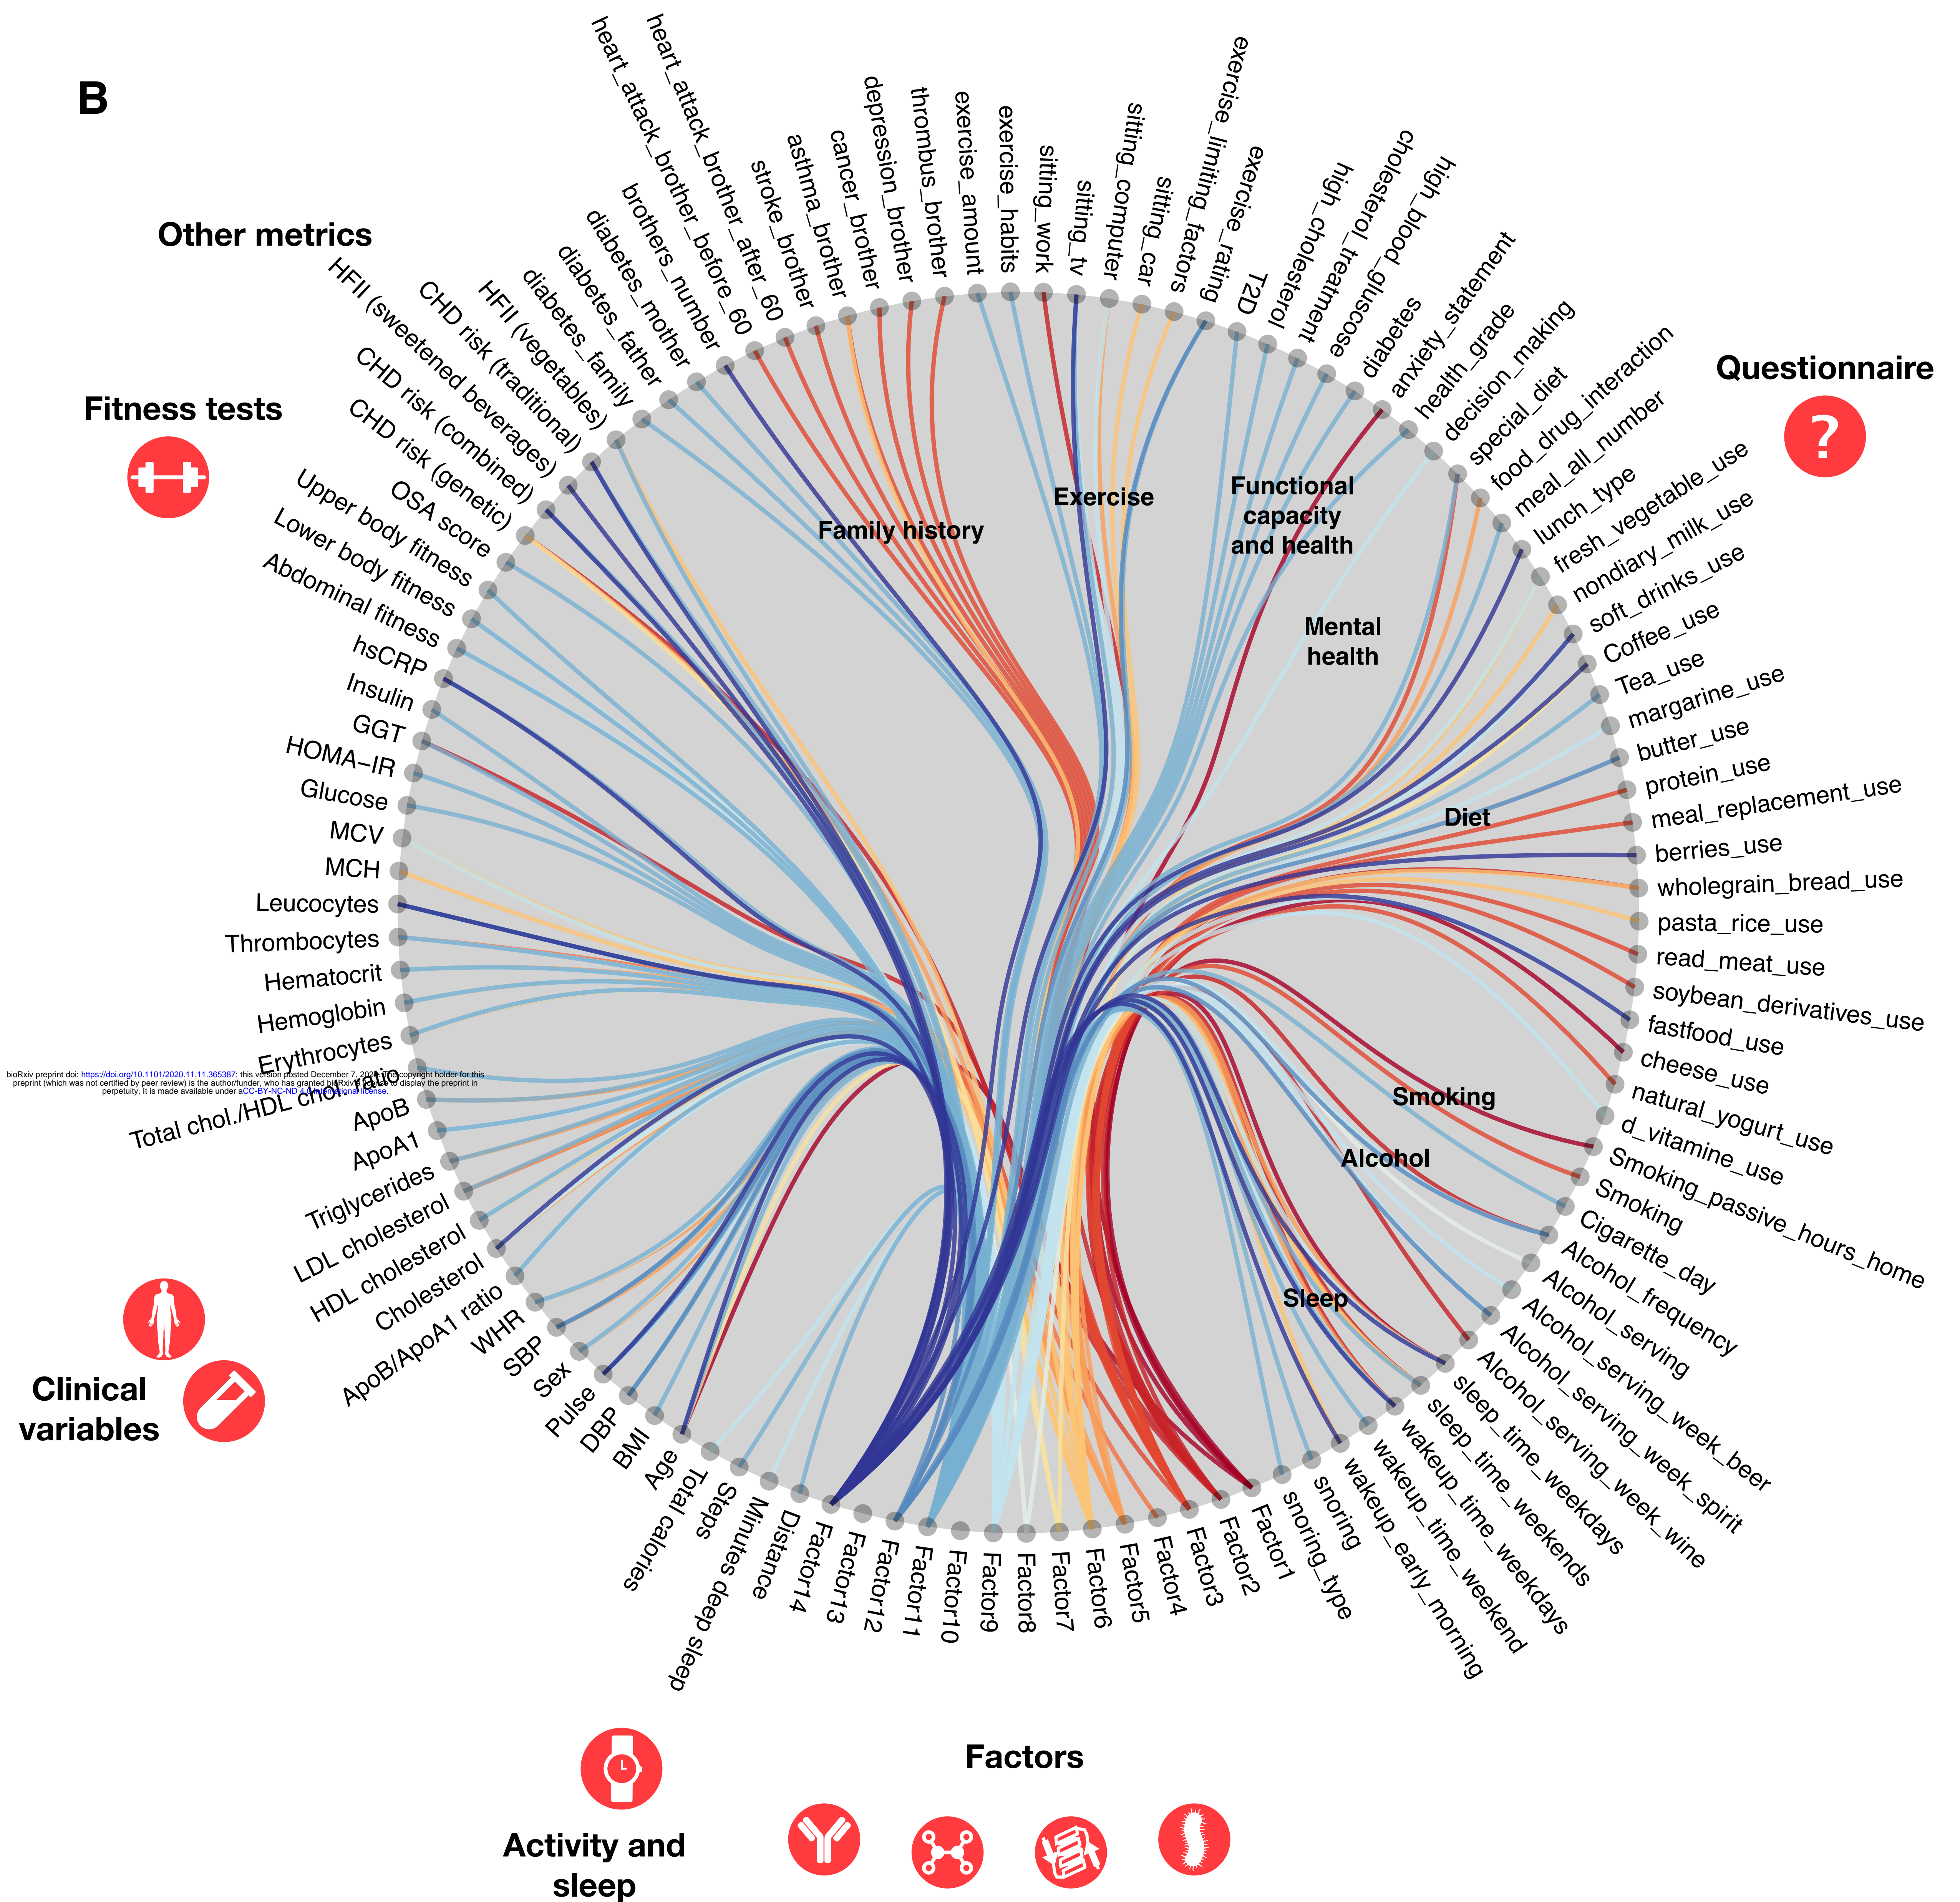

**Figure 3. A.** Variance decomposition. Percentage of total variance explained ( $R^2$ ) for each data layer (up) or variance explained ( $R^2$ ) for each factor and data layer (bottom). A dot marks the out-of-bound value ( $>50\%$ ) for autoantibodies. **B.** Association with phenotype. The factor values were tested for their association with the phenotypic variables and the top associations ( $FDR < 0.001$ ) are shown. The edges are bundled according to their category and colored based on the originating factor.

## A Factor 11: obesity and insulin resistance

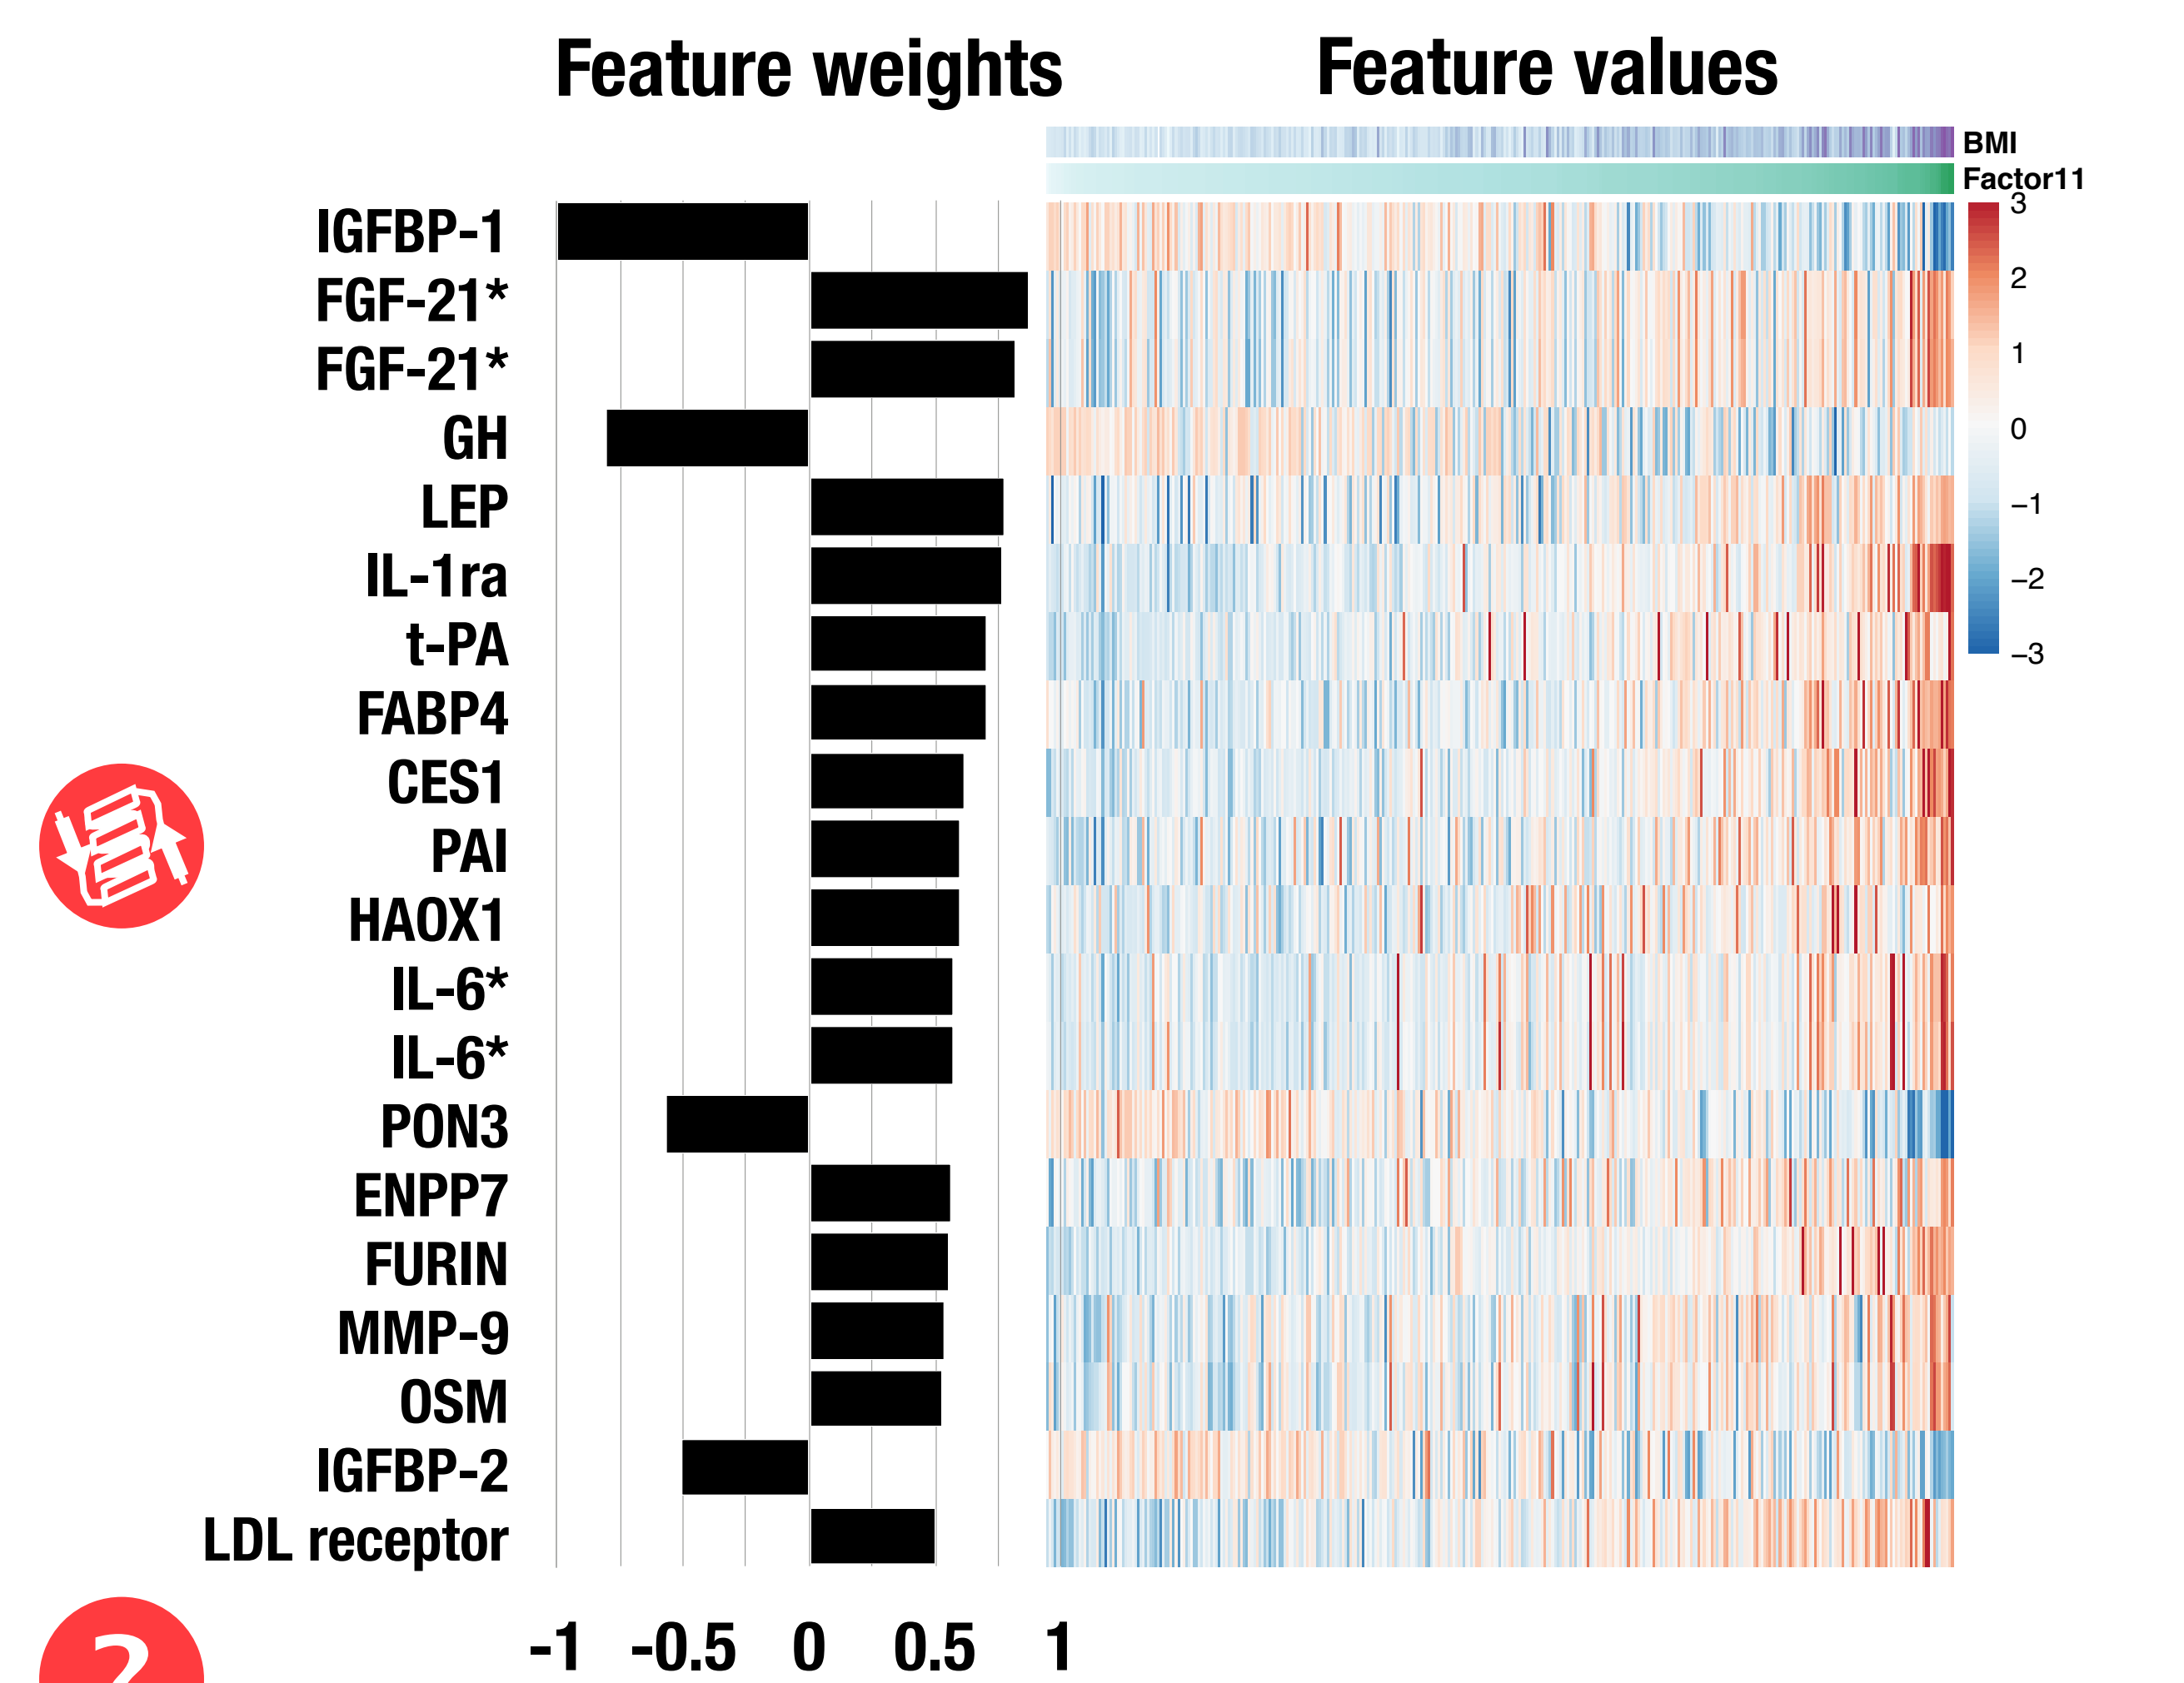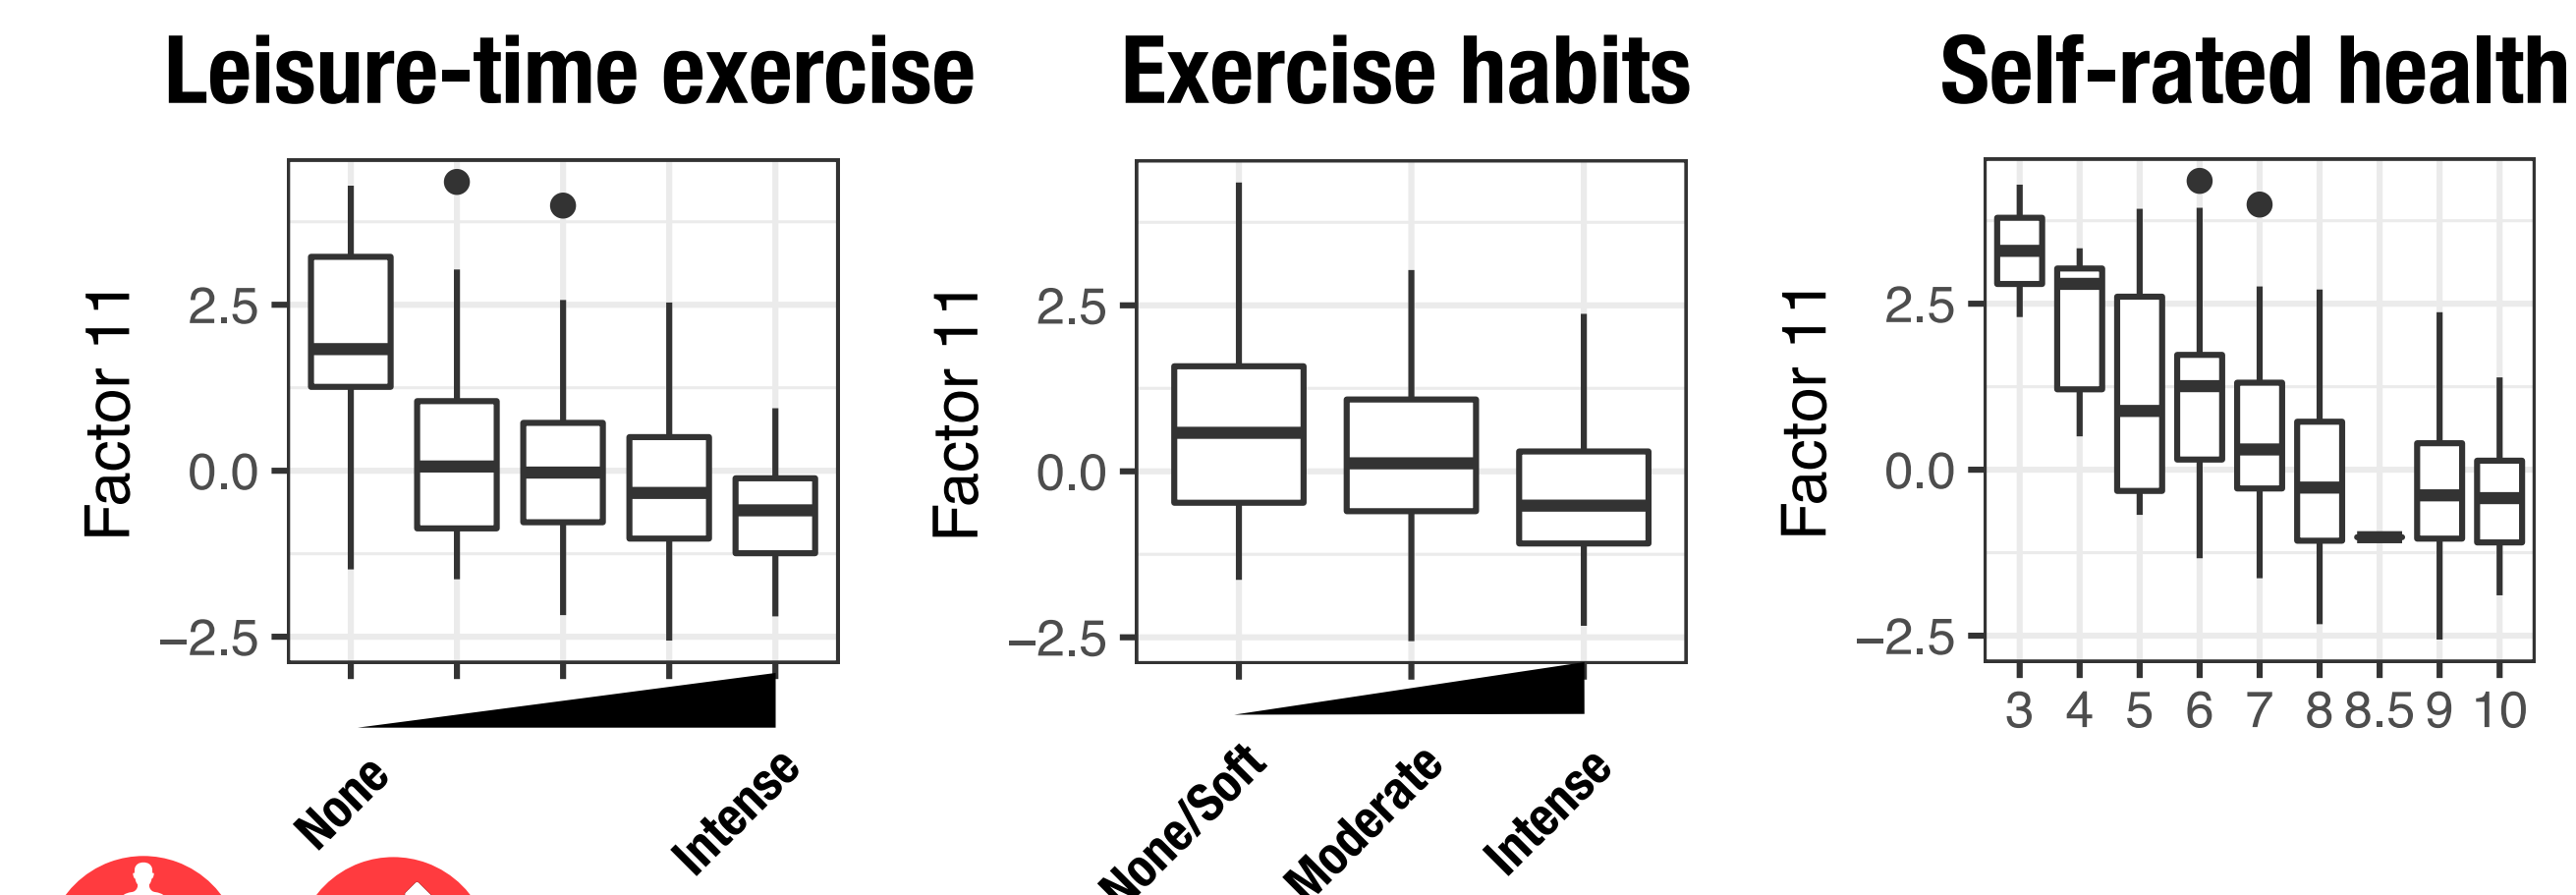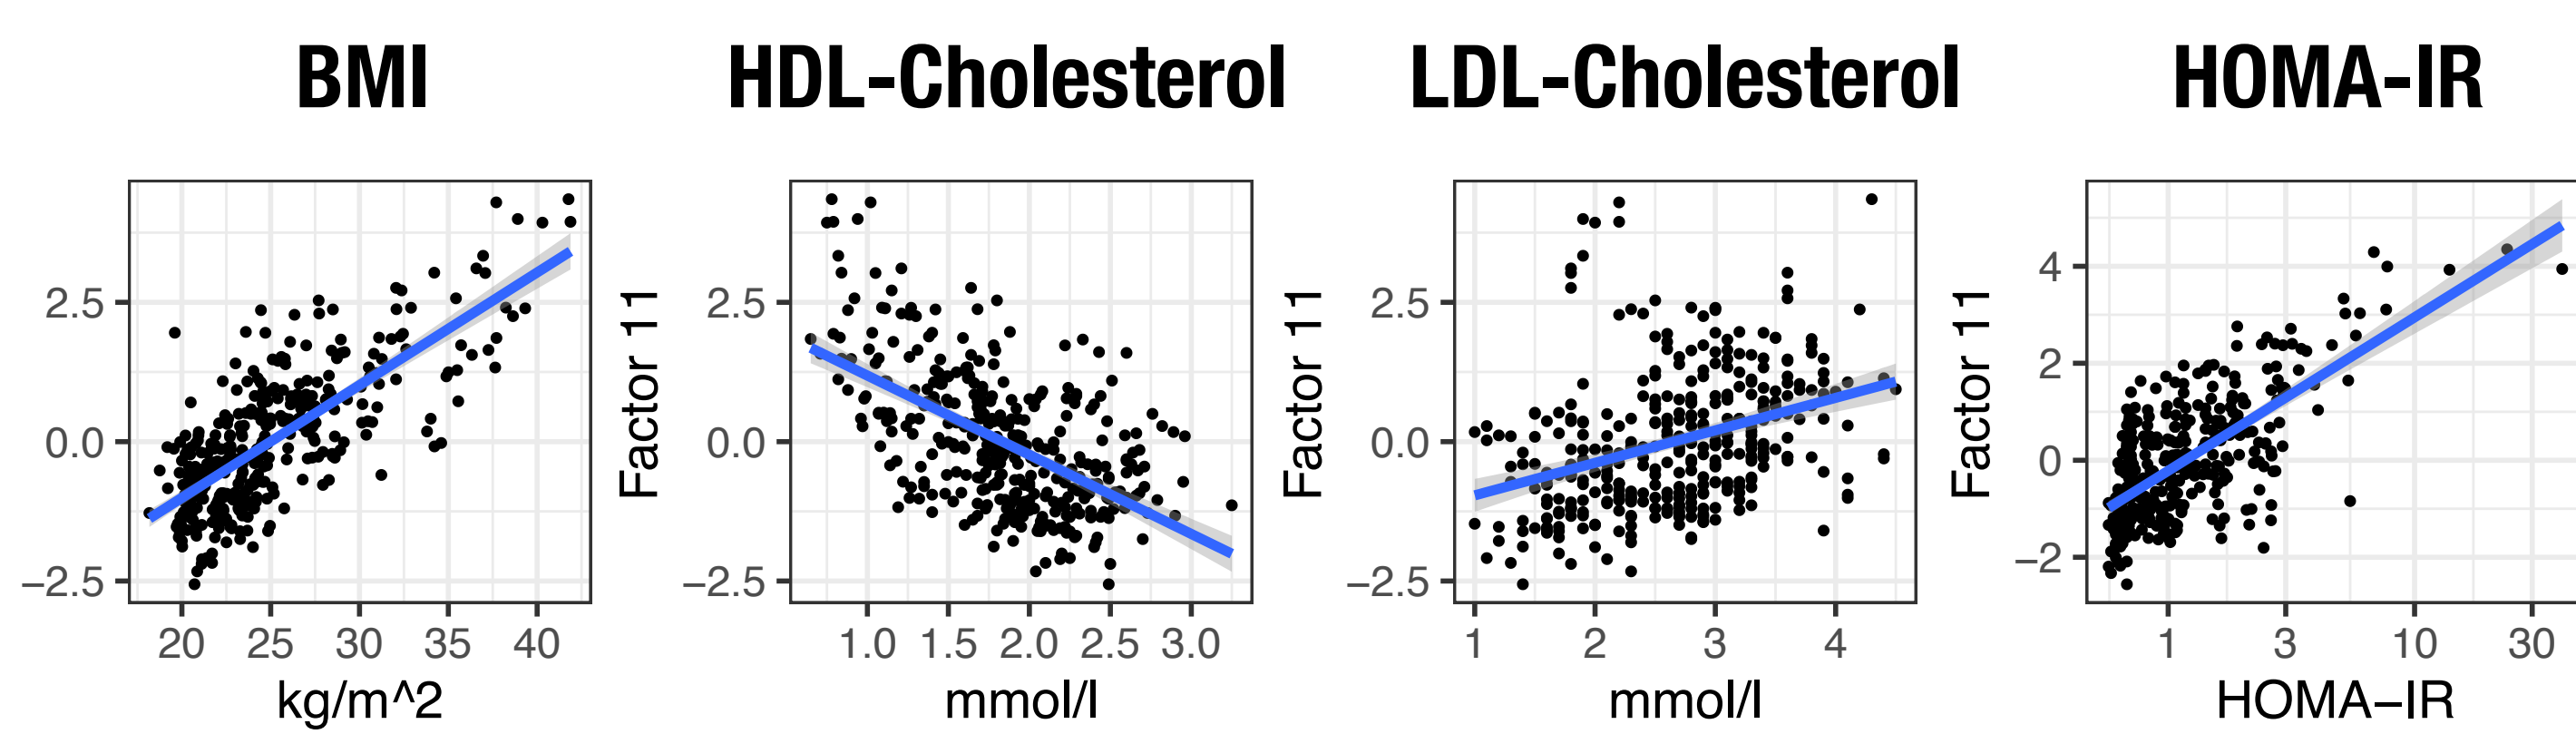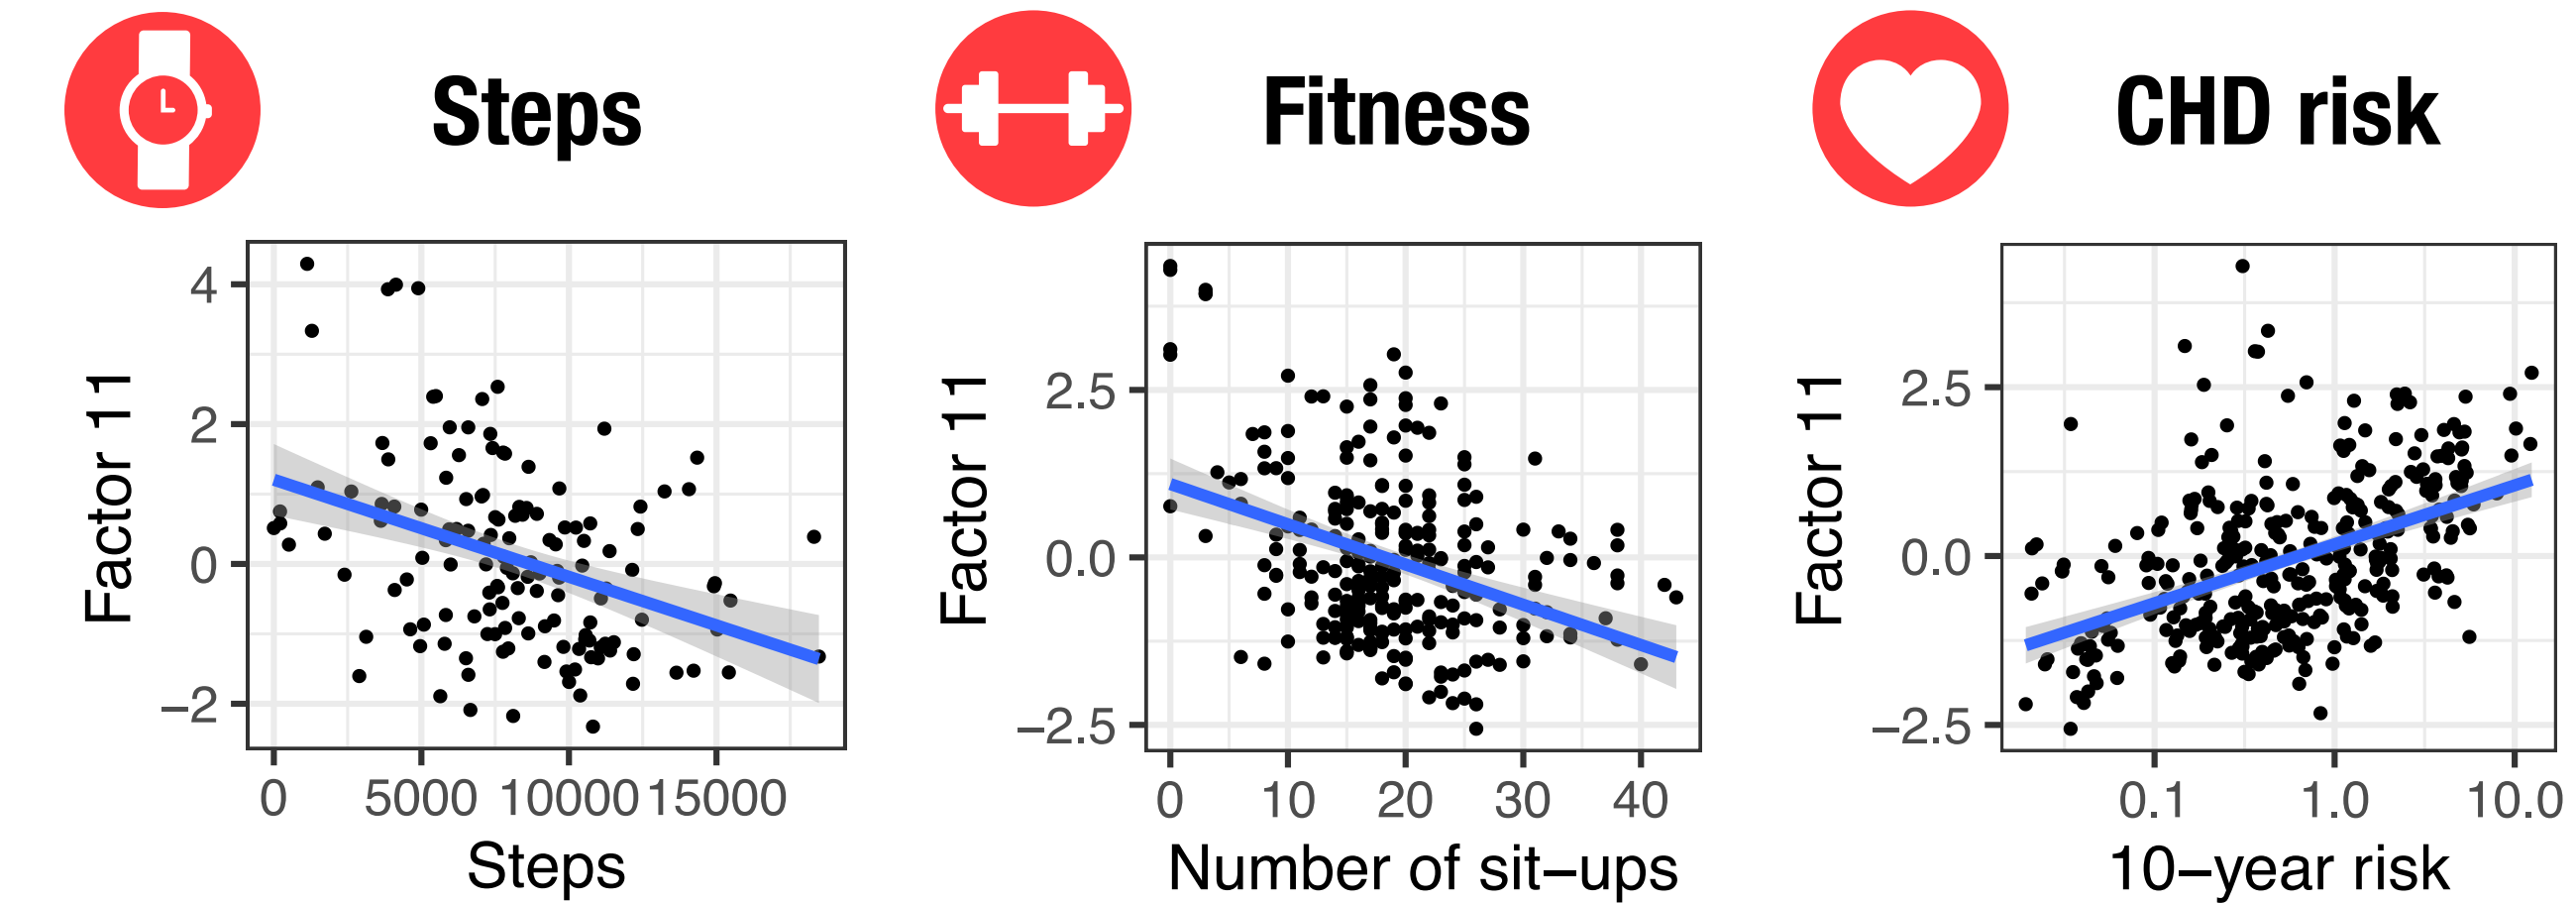

## B Factor 14: Hormonal influences

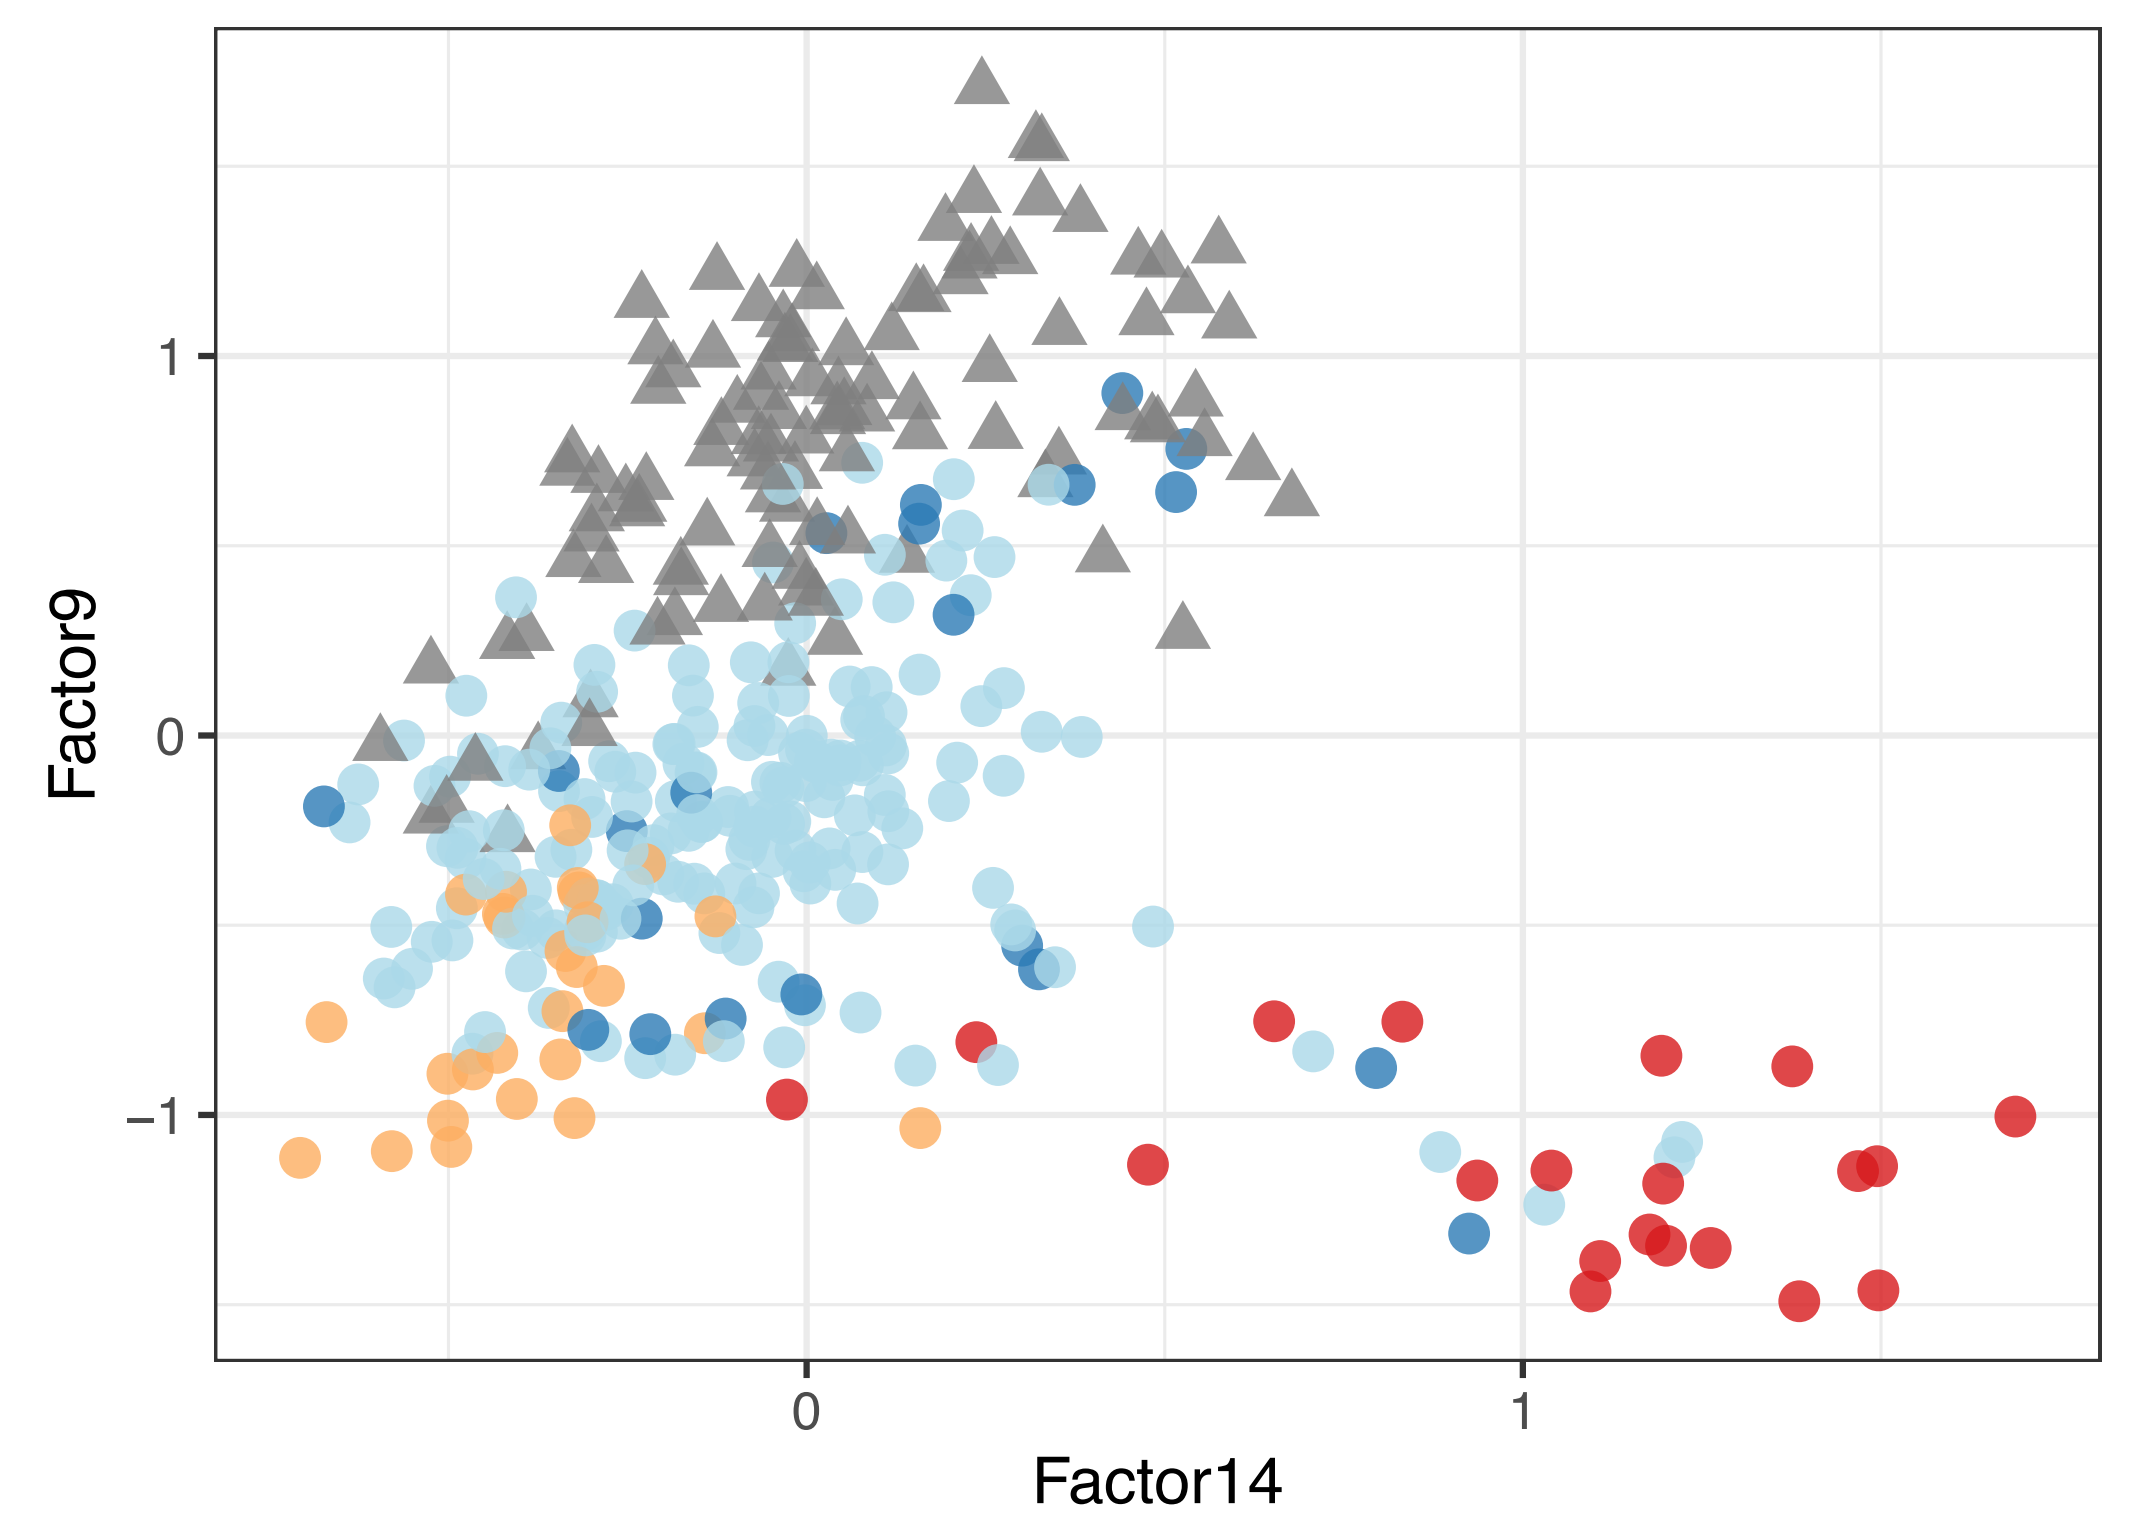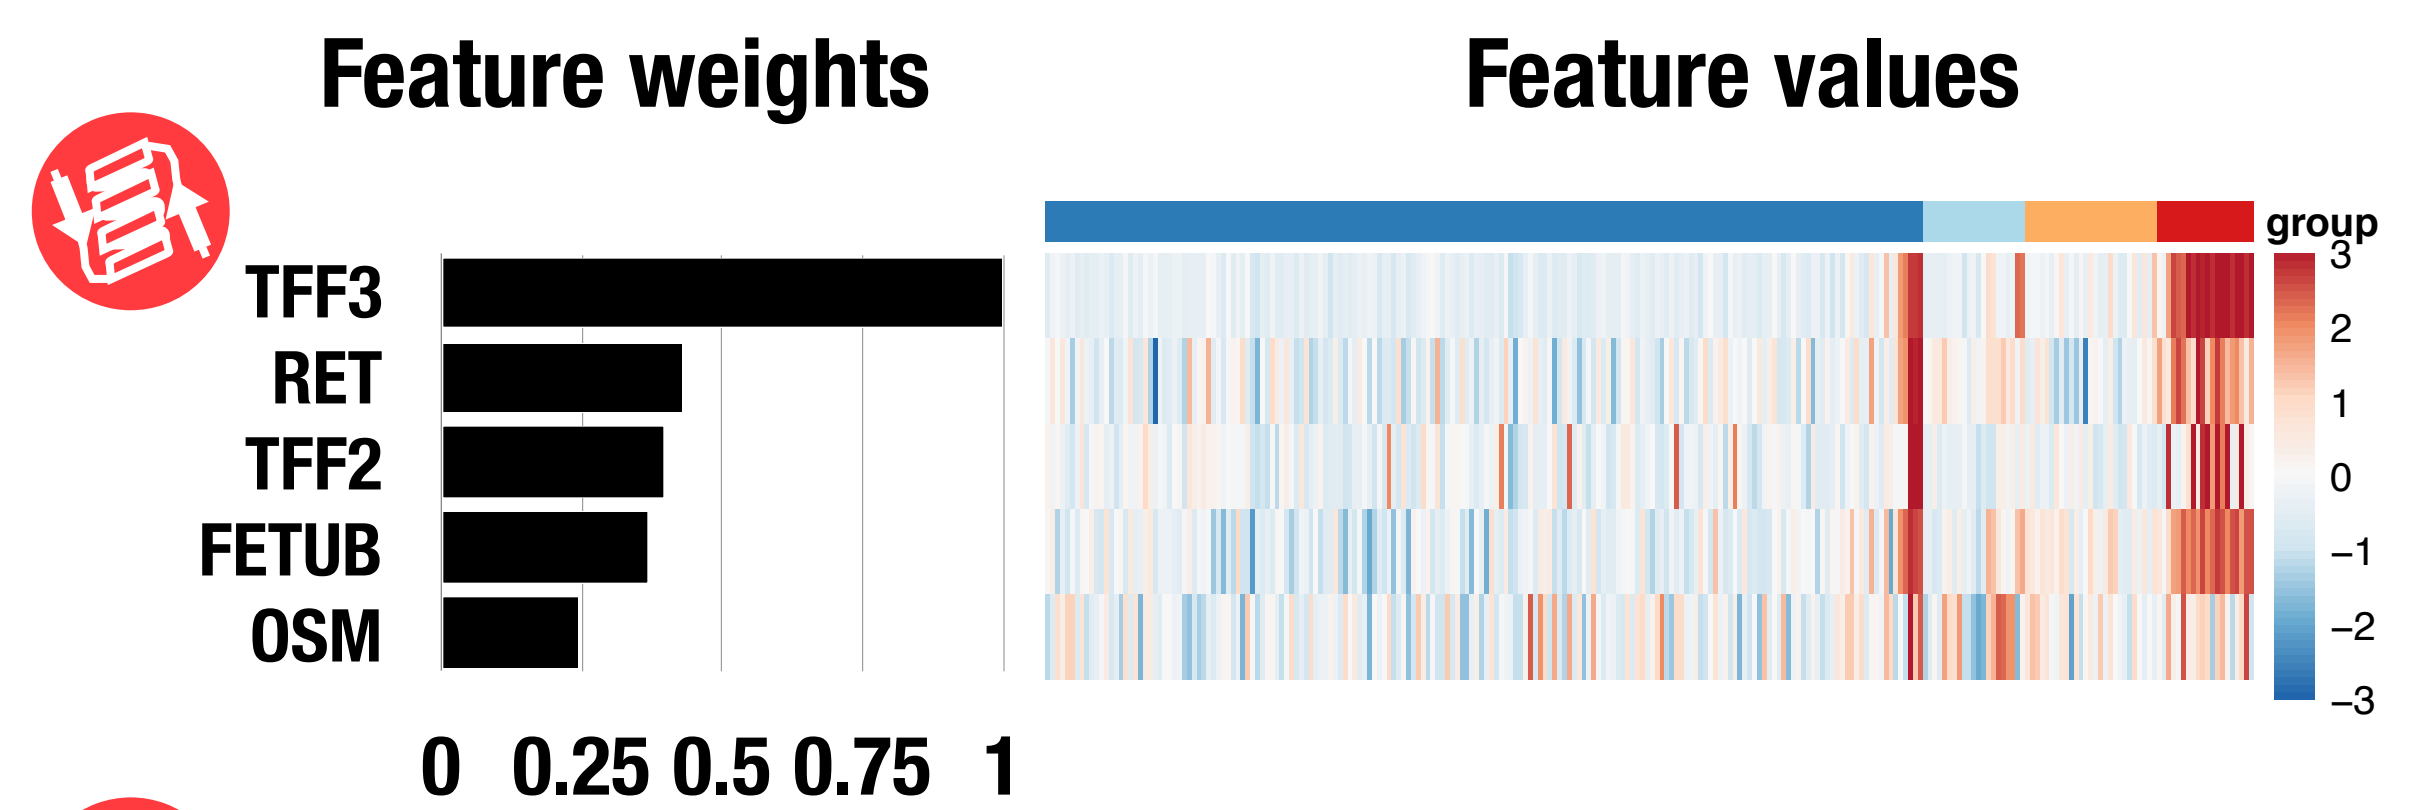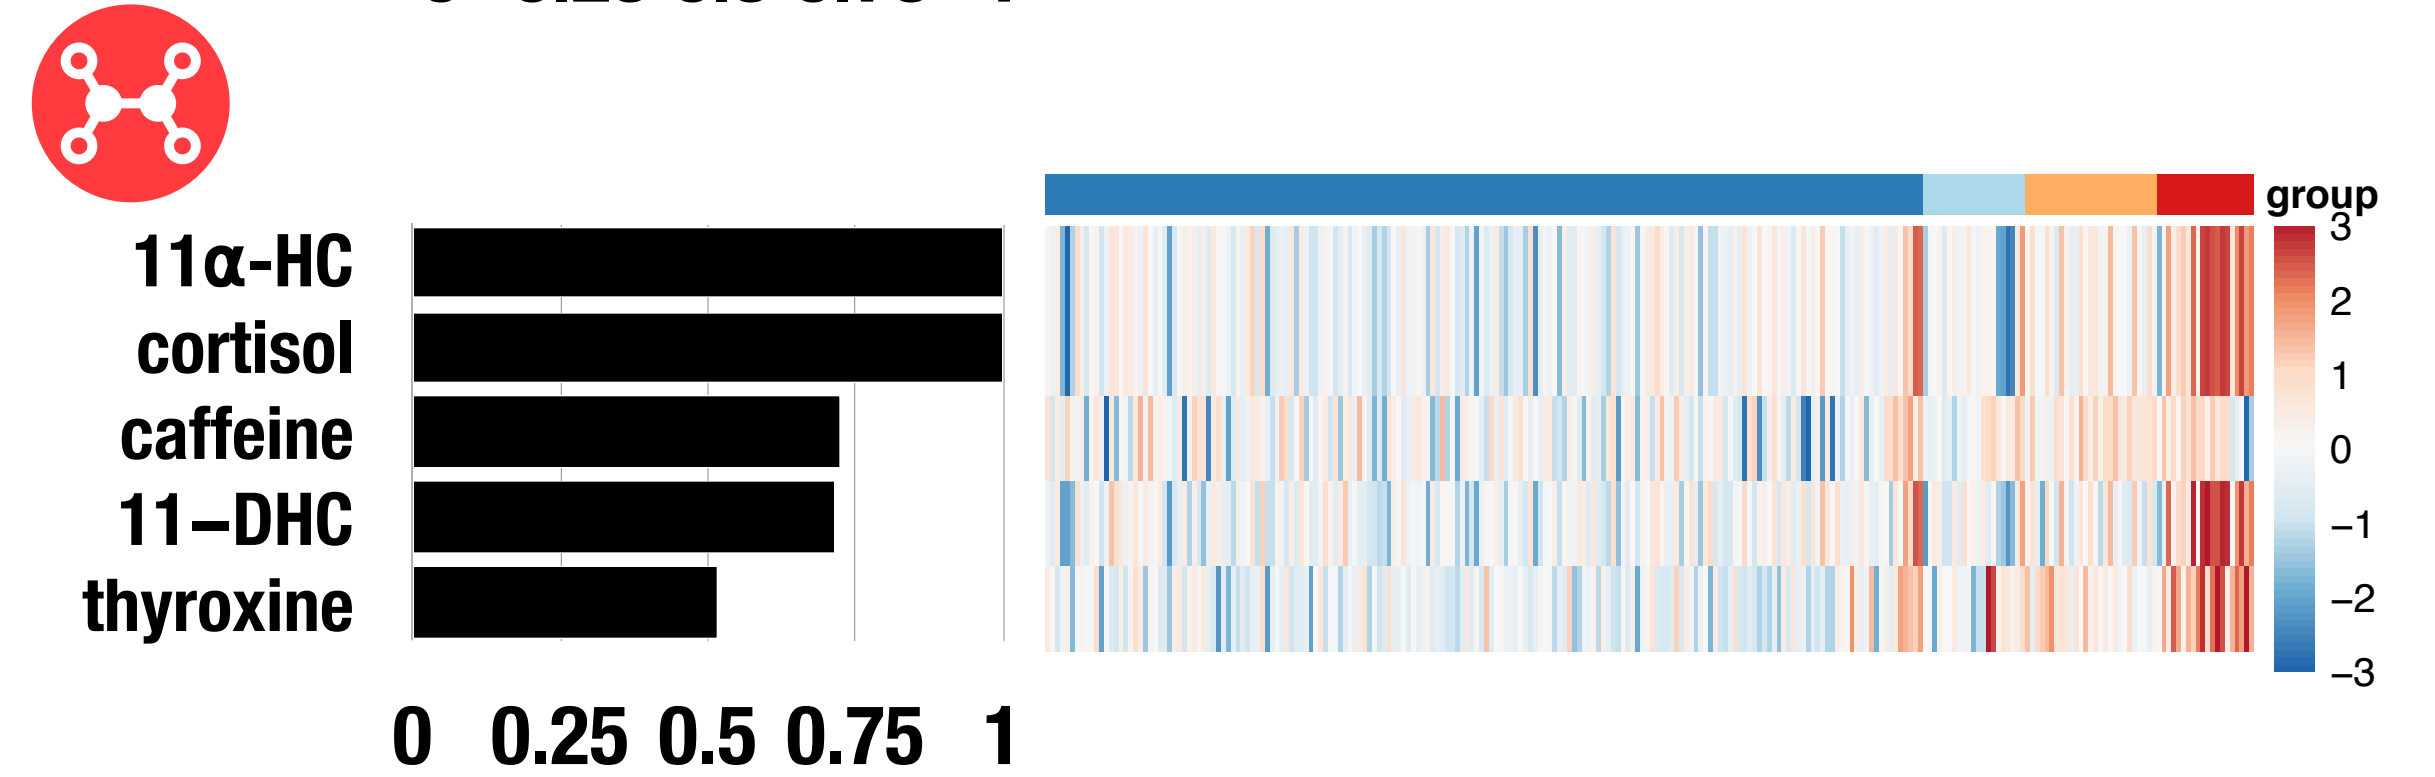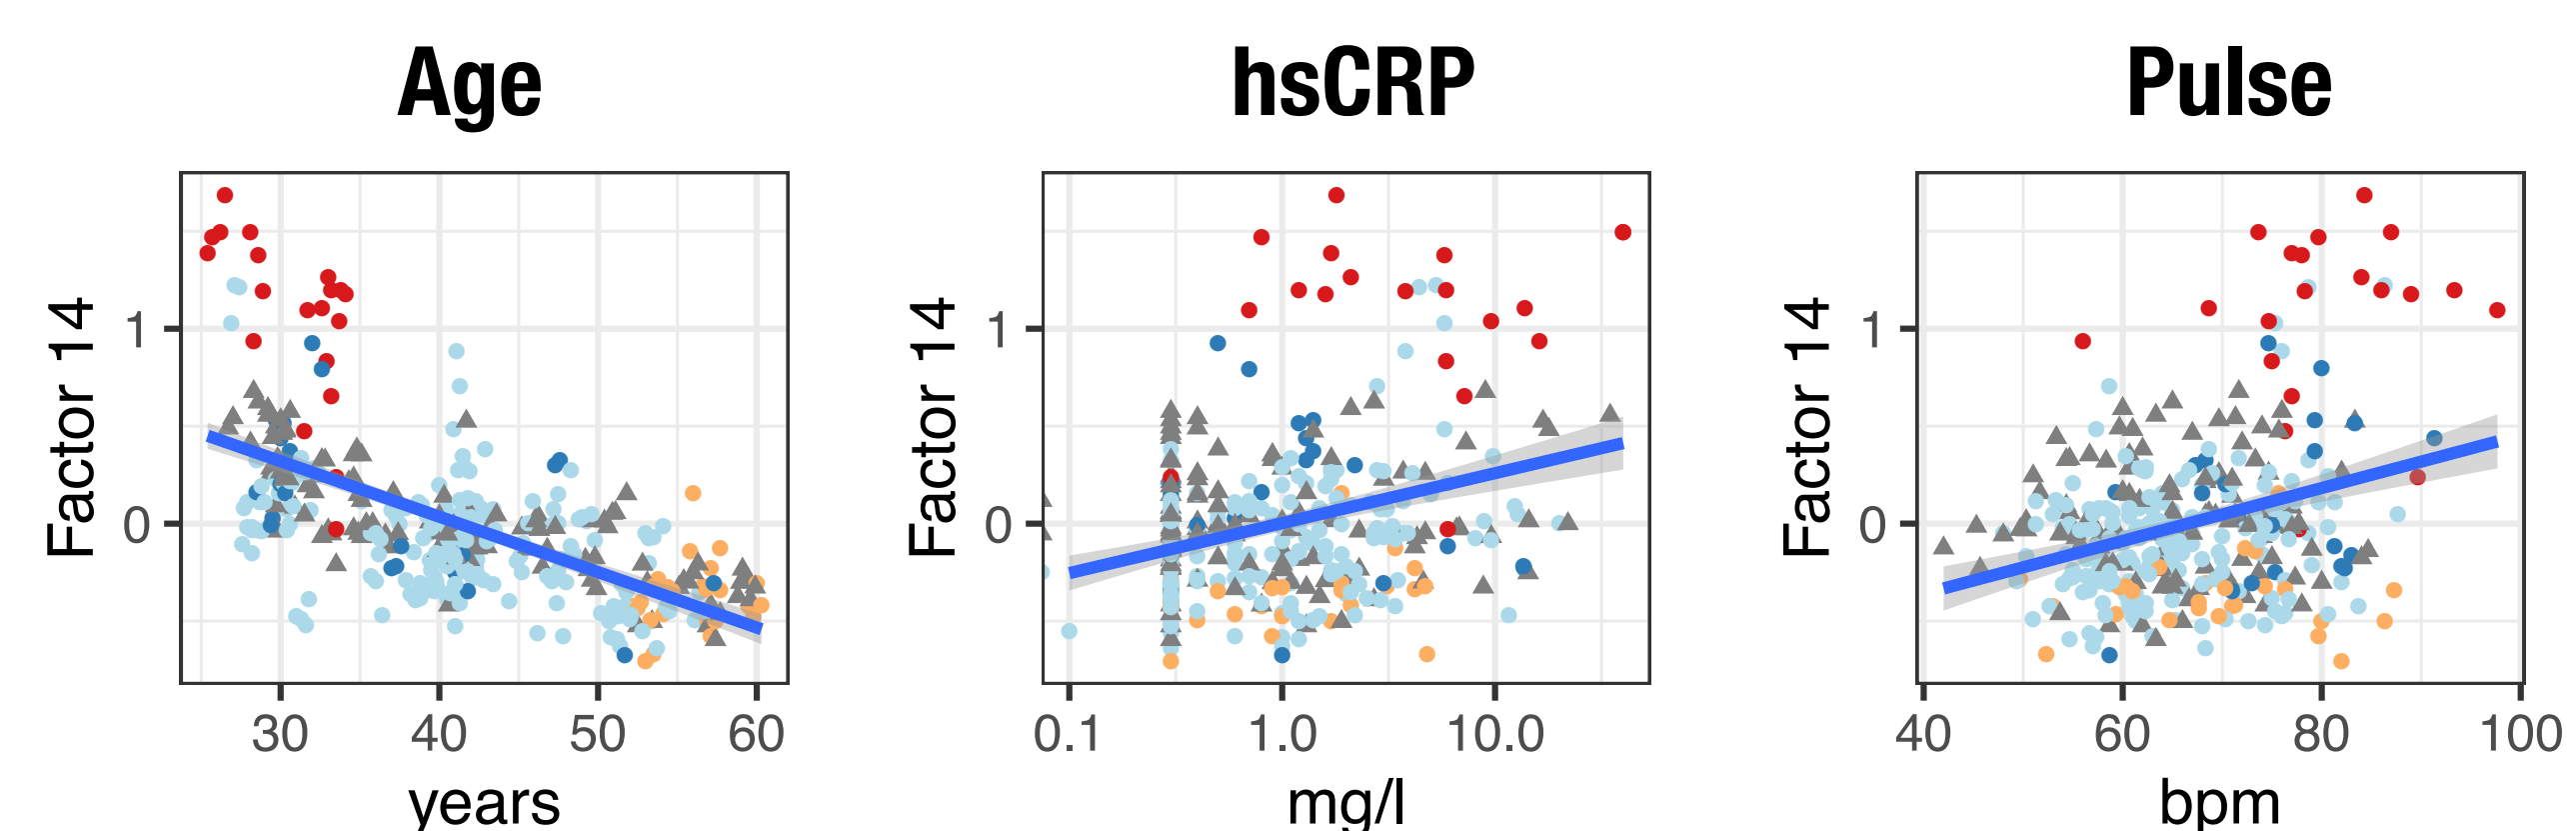

bioRxiv preprint doi: <https://doi.org/10.1101/2020.11.11.365387>; this version posted December 7, 2020. The copyright holder for this preprint (which was not certified by peer review) is the author/funder, who has granted bioRxiv a license to display the preprint in perpetuity. It is made available under aCC-BY-NC-ND 4.0 International license.

C

## Factor 7: Diet (coffee)

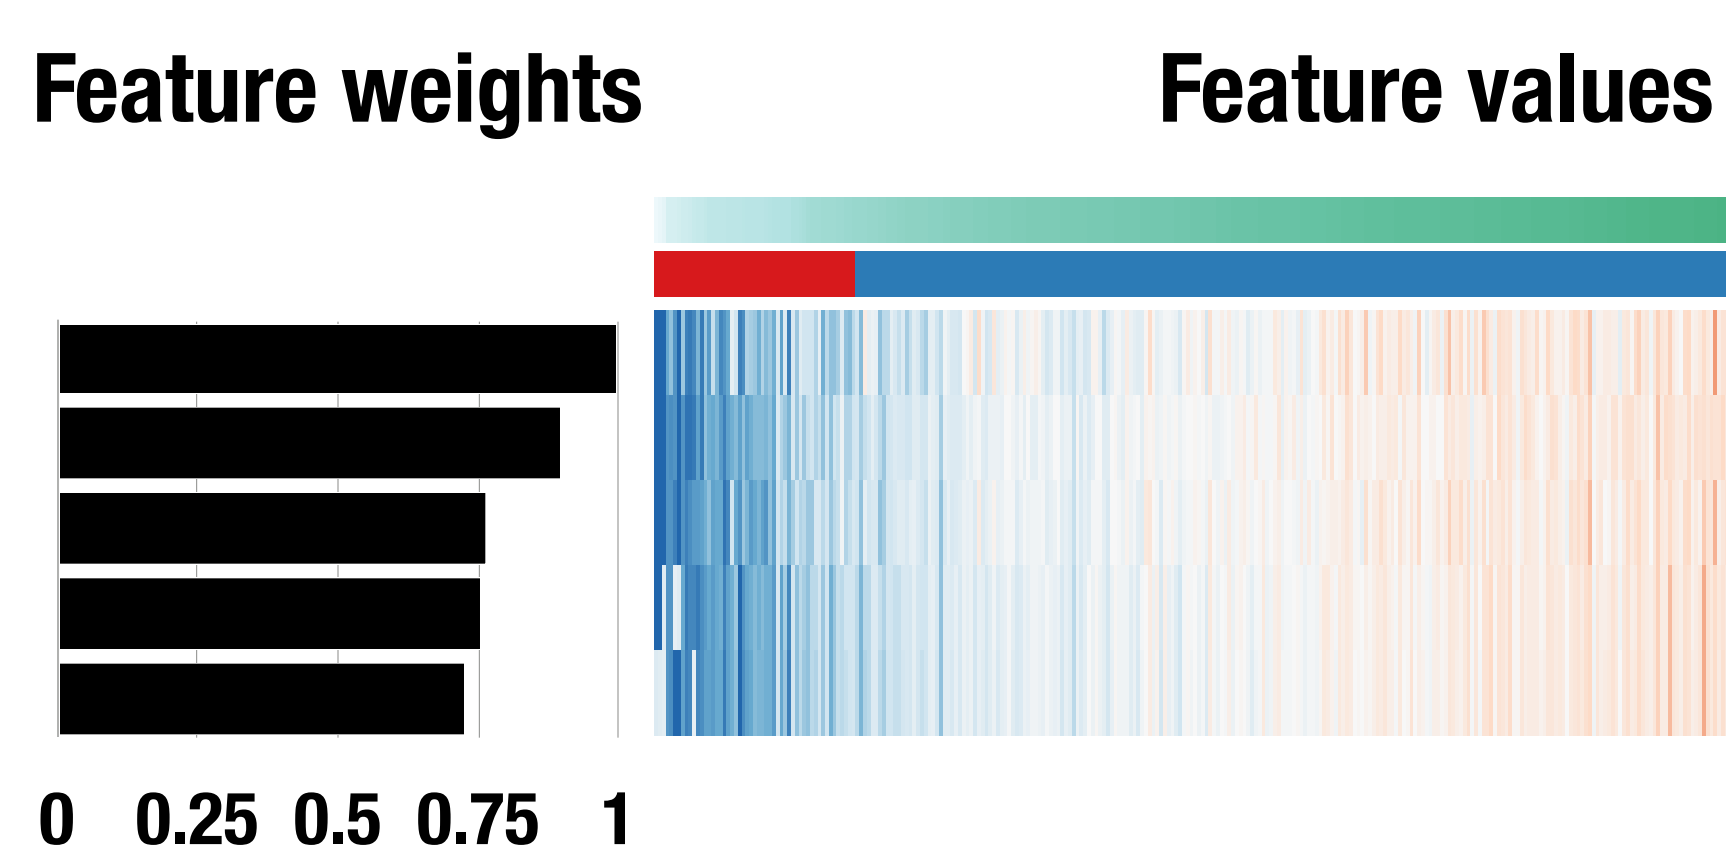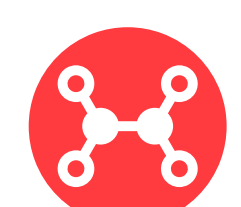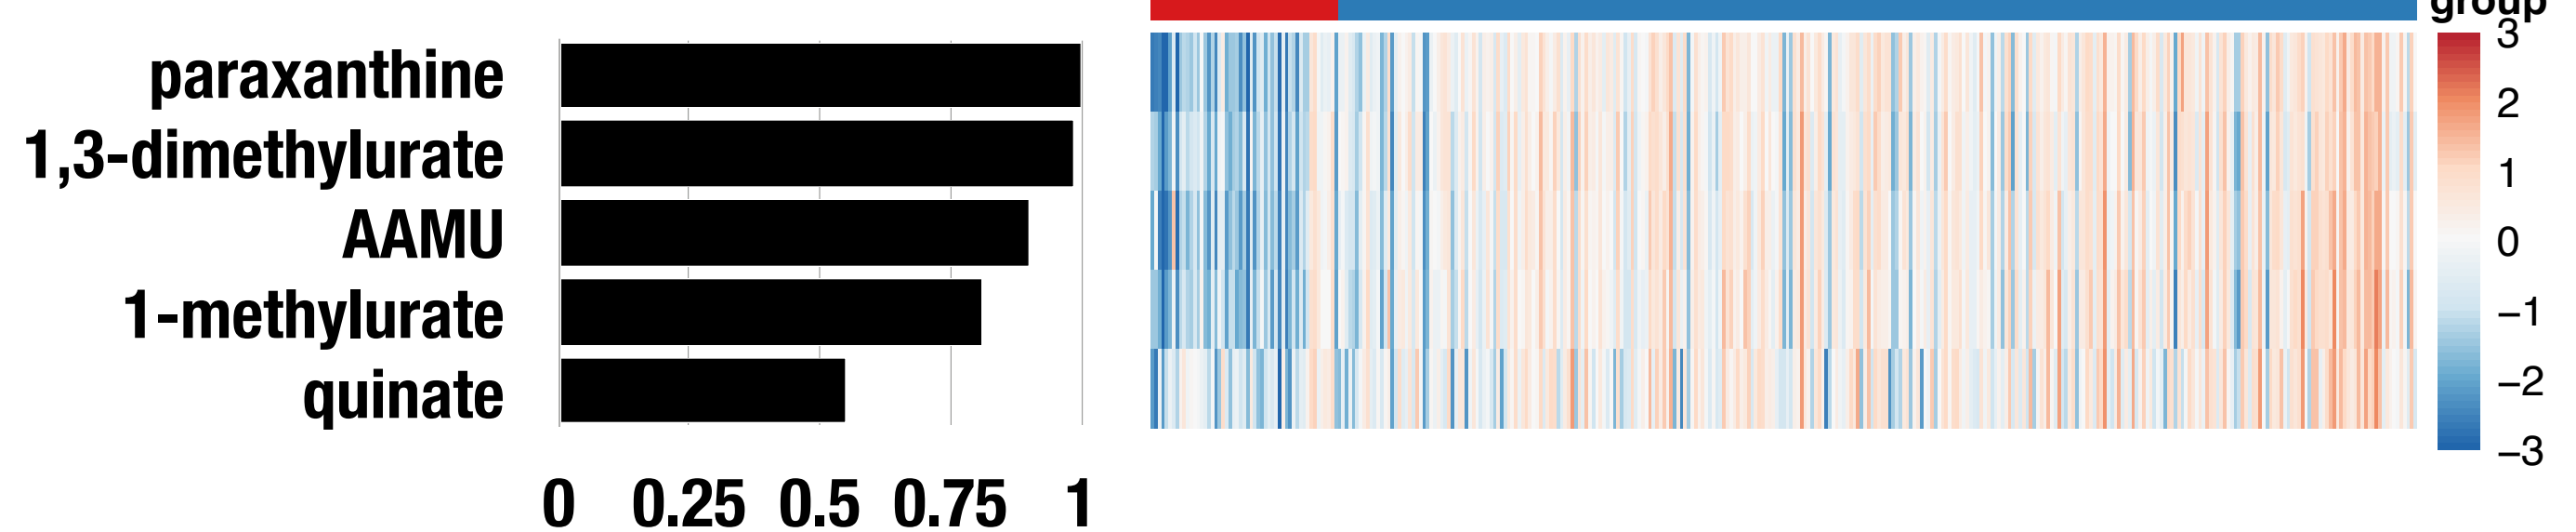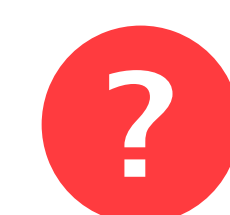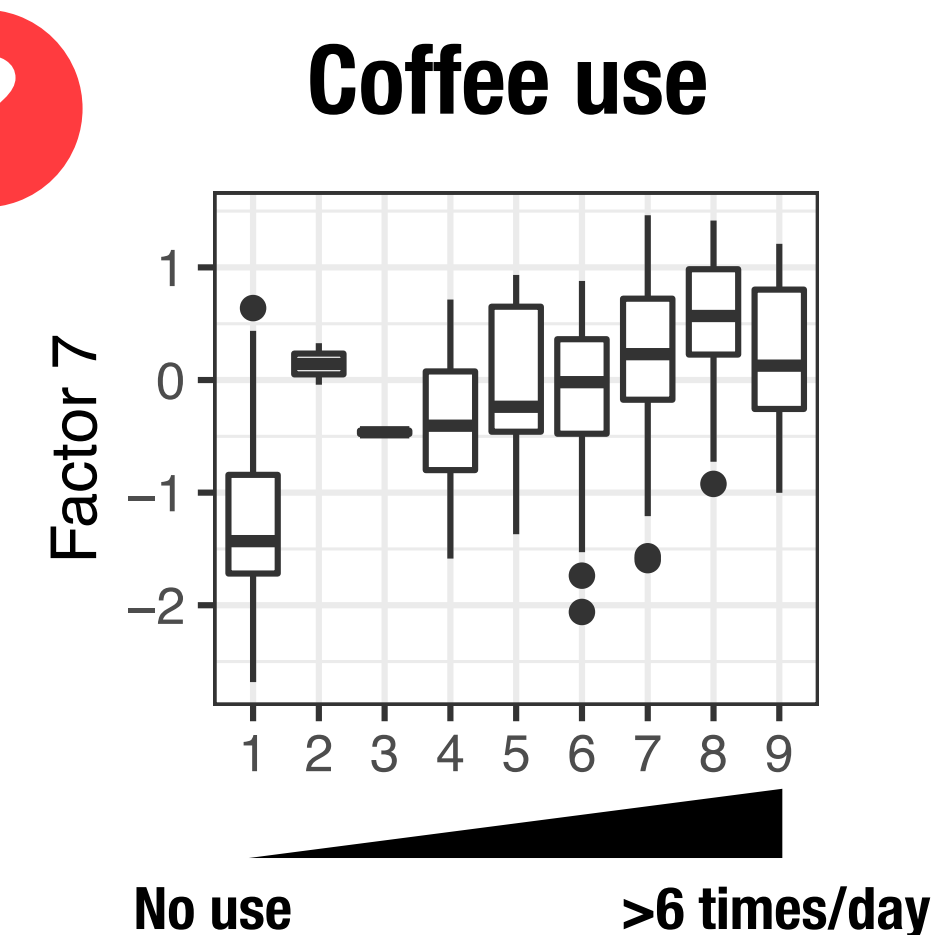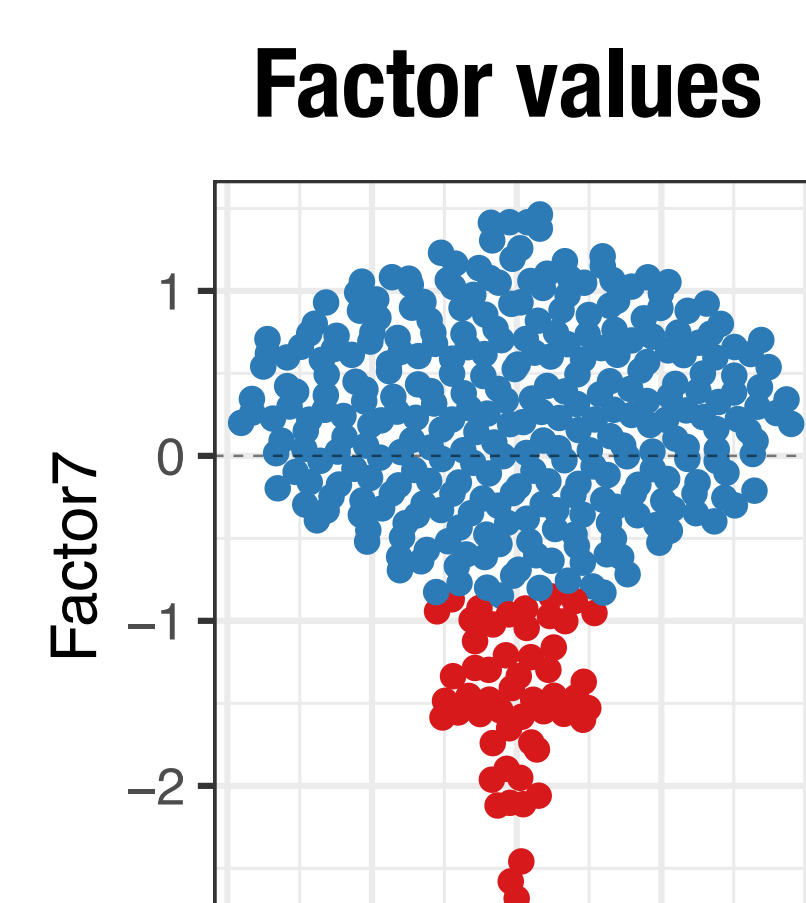

**Figure 4. A.** Factor 11 is linked to obesity and insulin sensitivity. The top scaled protein weights for Factor 11 are shown as well as their values (row z-score). The association between the factor values for each sample and the phenotypic variables is shown. A regression line with 95% confidence interval is shown when appropriate. An asterisk marks the proteins measured on multiple PEA panels. **B.** Factor 14 is influenced by hormones. A scatterplot of Factor 9 and Factor 14 values shows that samples can be separated based on the sex (Factor 9) and the use of hormones (Factor 14). Factor 14 identifies a group of young women using contraceptives with ethinyl estradiol (red). The top metabolites and proteins with positive scaled weights on Factor 14 are shown. The original feature values are shown as a heatmap (row z-score). The association between the factor values for each sample and the phenotypic variables is shown, as well as a regression line with 95% confidence interval. Points are coloured as in the top panel. Abbreviations: 11 $\alpha$ -HC: 11alpha-hydrocortisone, 11-DHC: 11-dehydrocorticosterone. **C.** Factor 7 is associated to coffee consumption. The scaled positive weights are shown for the top metabolites, as well as their values. The association between the factor values with self-reported coffee consumption is shown. A two-group classification of the samples based on Factor 7 values was obtained with gaussian-mixture modeling and shown with colored dots (red: lower coffee consumption, blue: higher coffee consumption).



# A Between-individuals

## Cardiometabolic

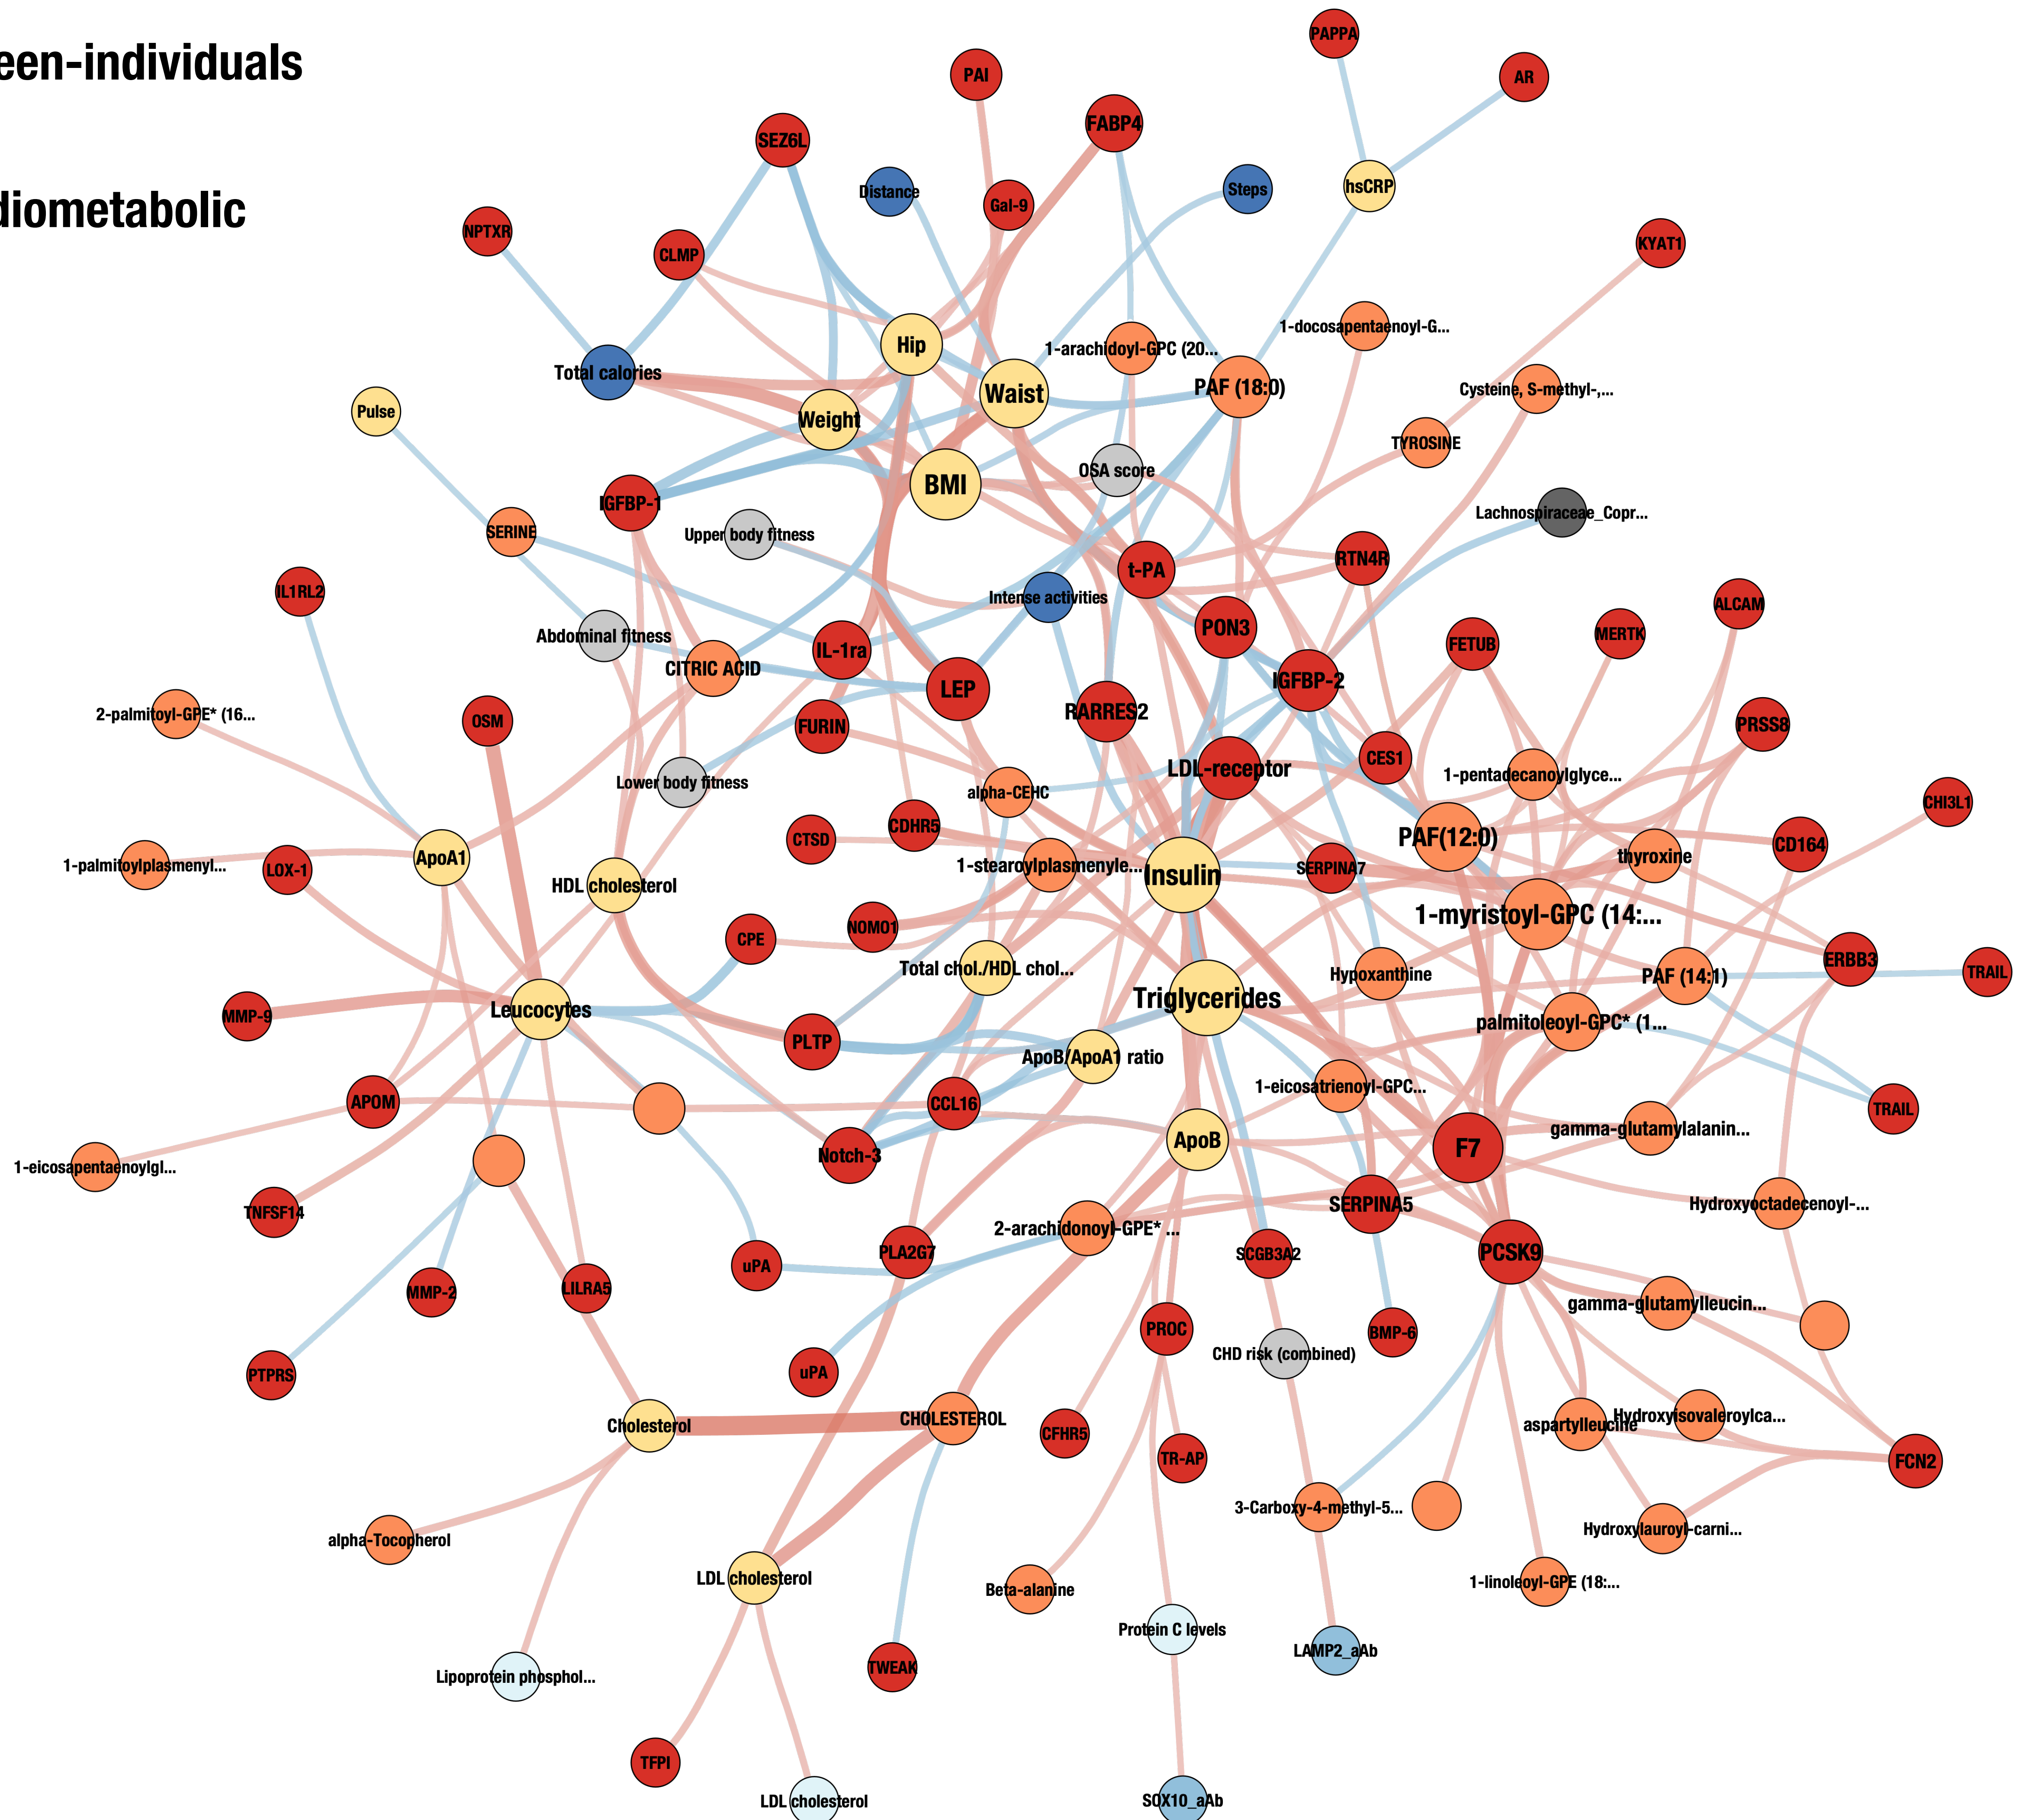

# B Within-individuals

## Activity and sleep

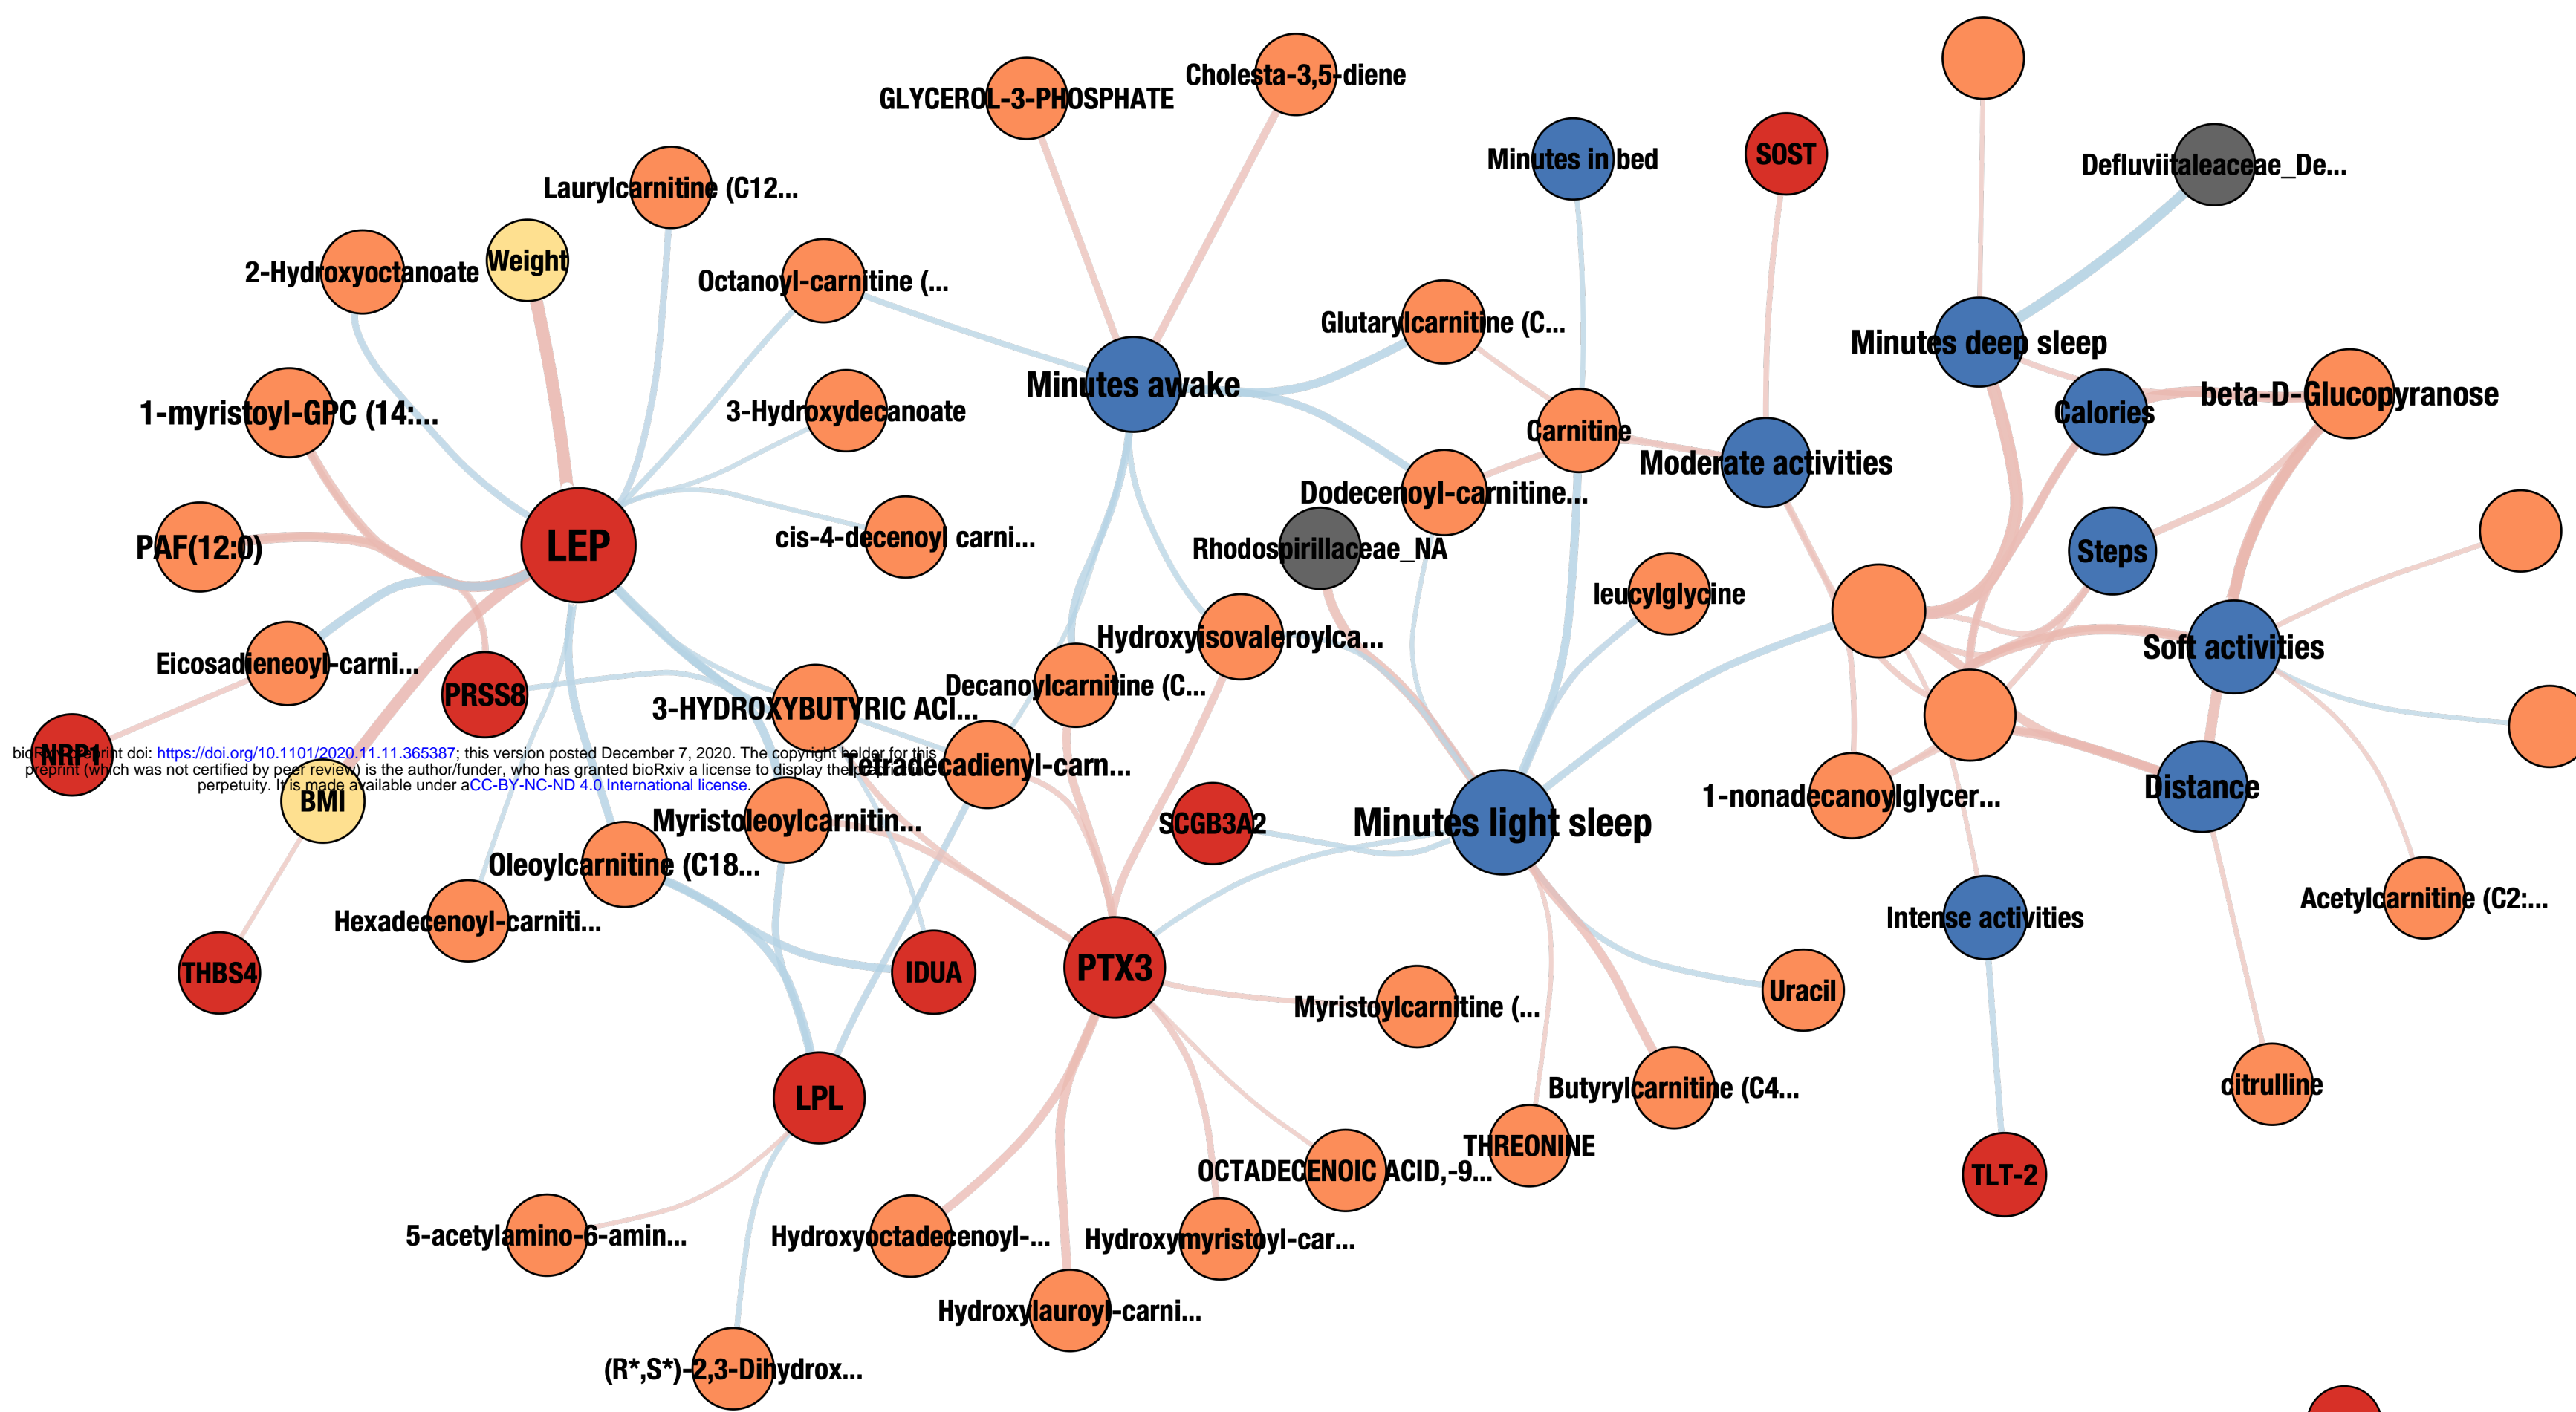

## Inflammation

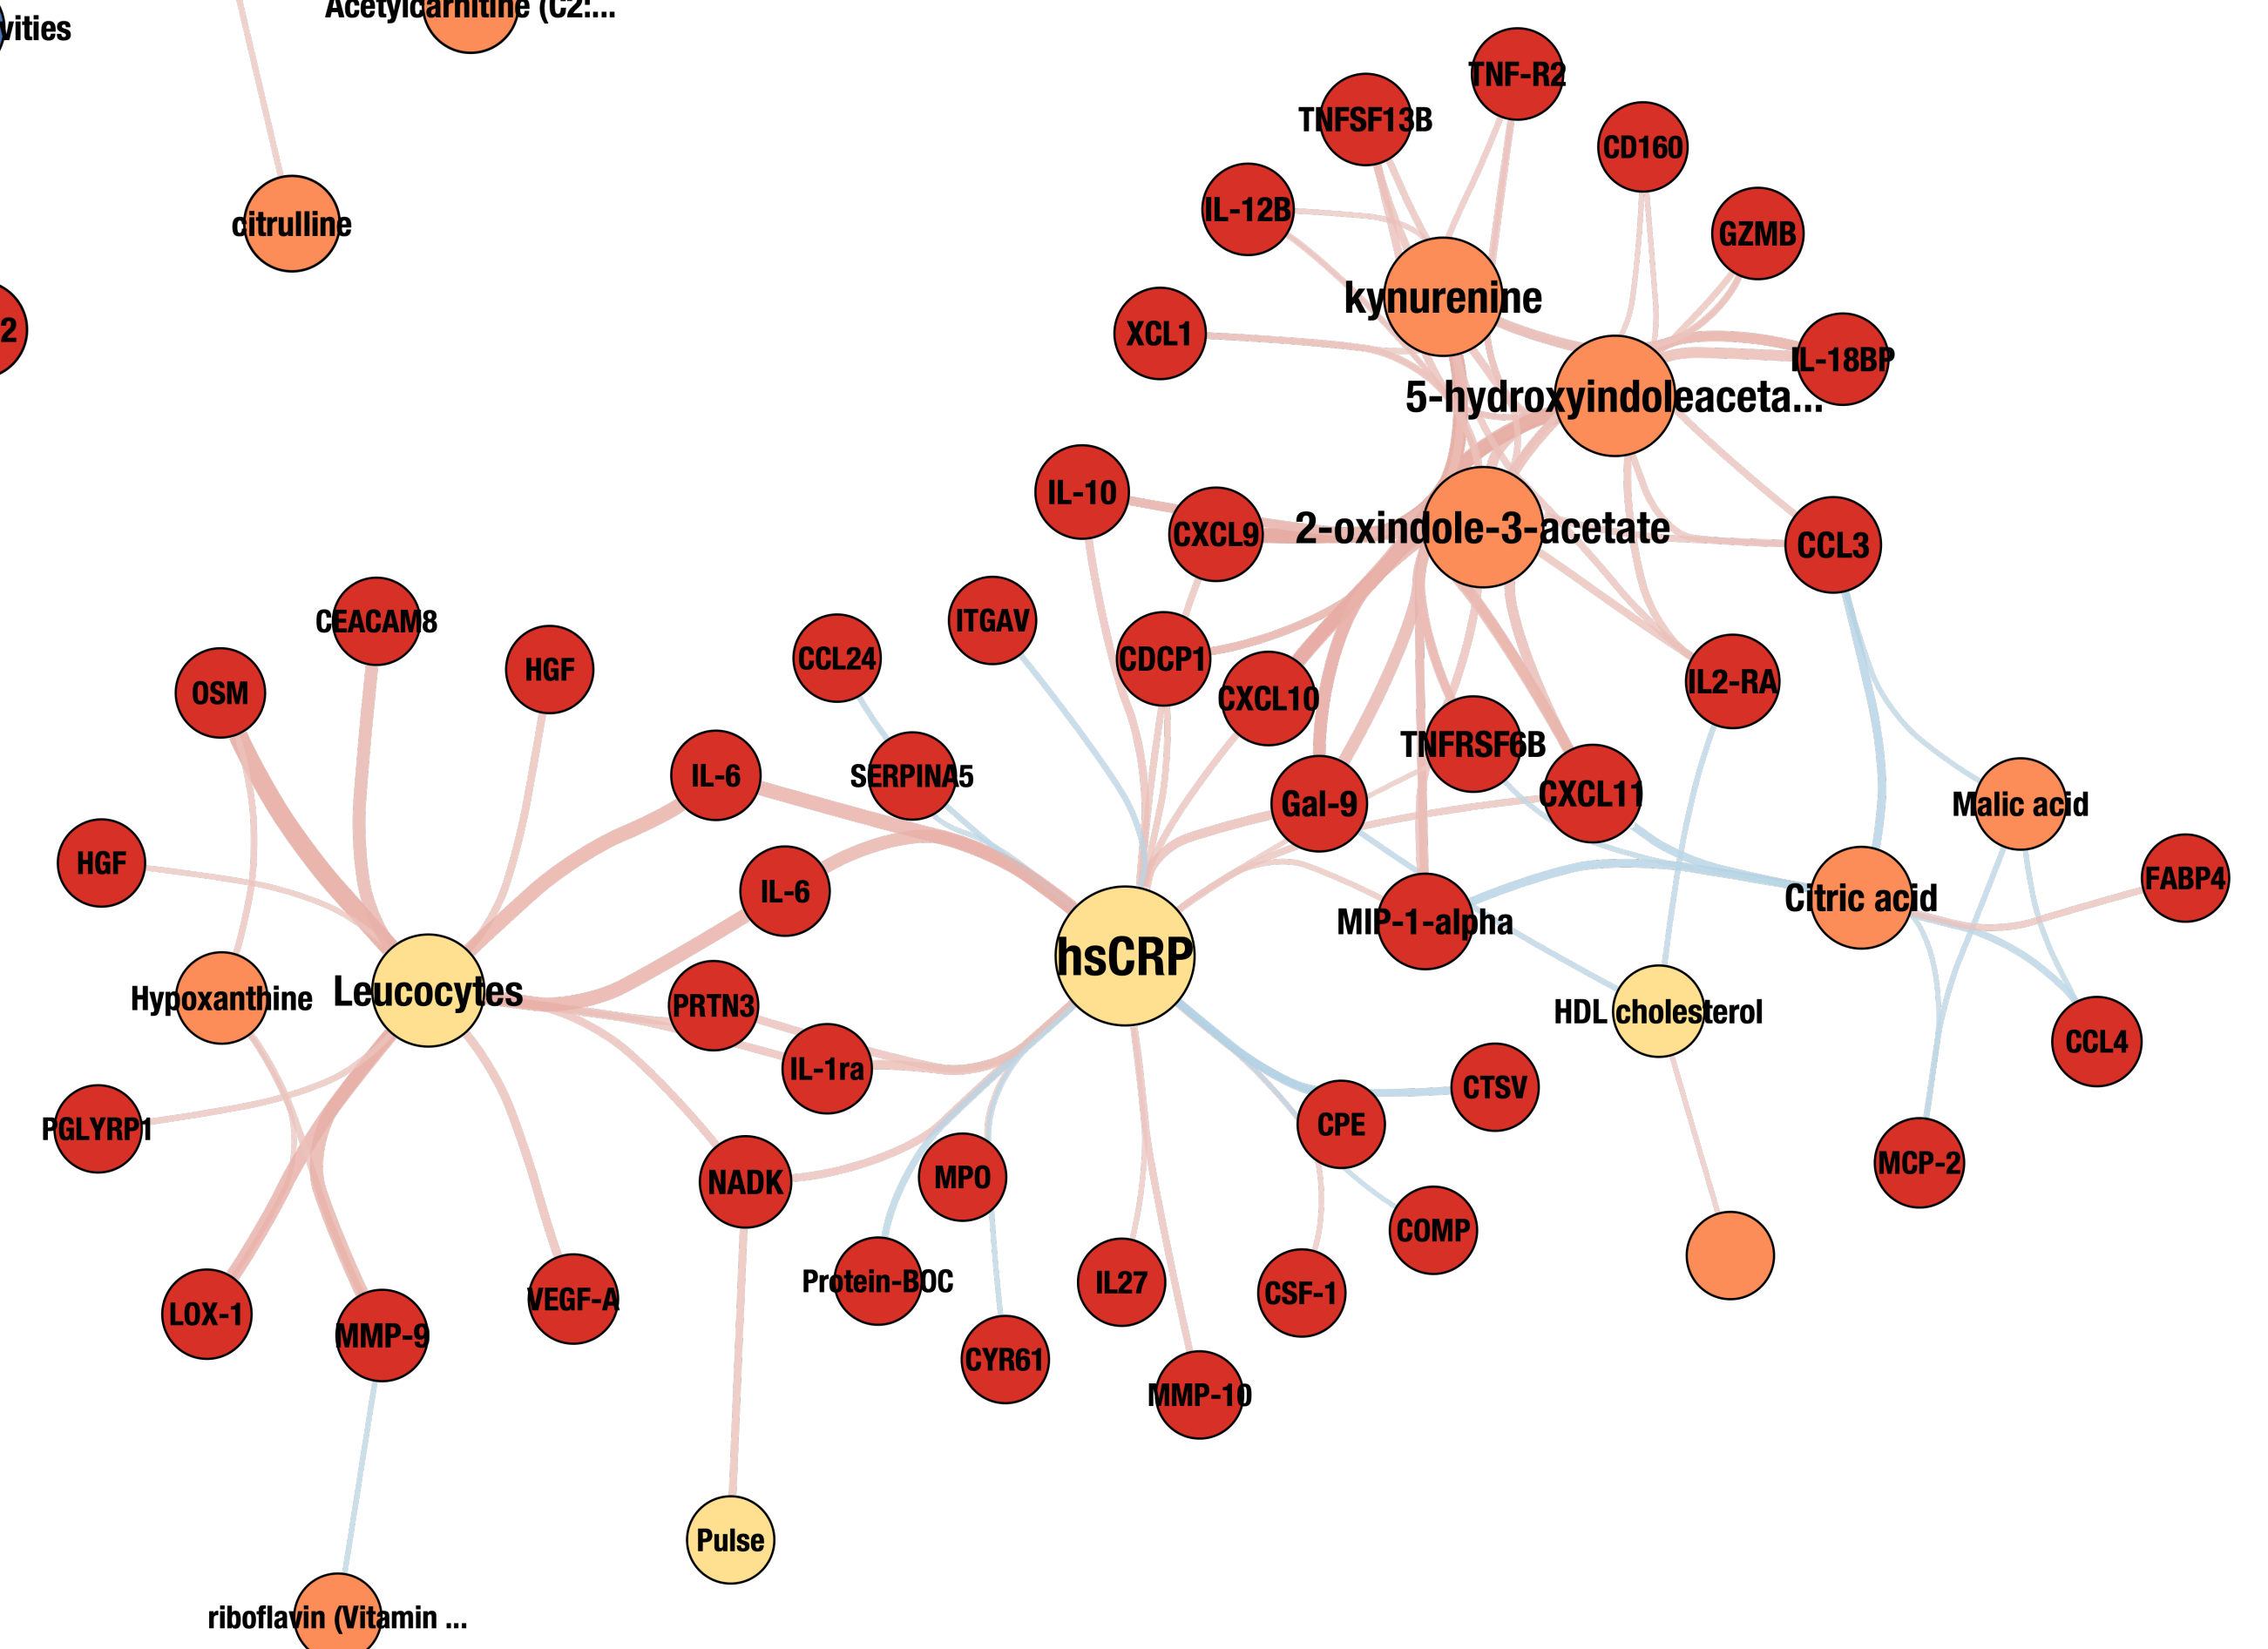

### Data type (node color)

- Proteins
- Metabolites
- Biometrics
- Genetic scores
- Autoantibodies
- Activities and sleep
- Gut microbiome
- Other

### Correlation (edge color)

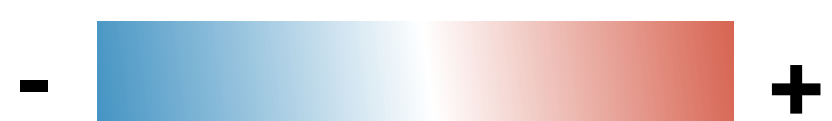

**Figure 5.** Cross-correlation network analysis aids the interpretation the relationship between data types. Only associations between features of different type were considered to calculate correlation networks at  $FDR < 0.05$ . The size of the nodes is proportional to the node degree and the edge thickness is proportional to the magnitude of the correlation. The node color indicate different data types. The proteins appearing twice in the network were measured on multiple PEA panels. **A.** Selected between-individual subnetwork. **B.** Selected within-individual network modules.

## A Clinical variables

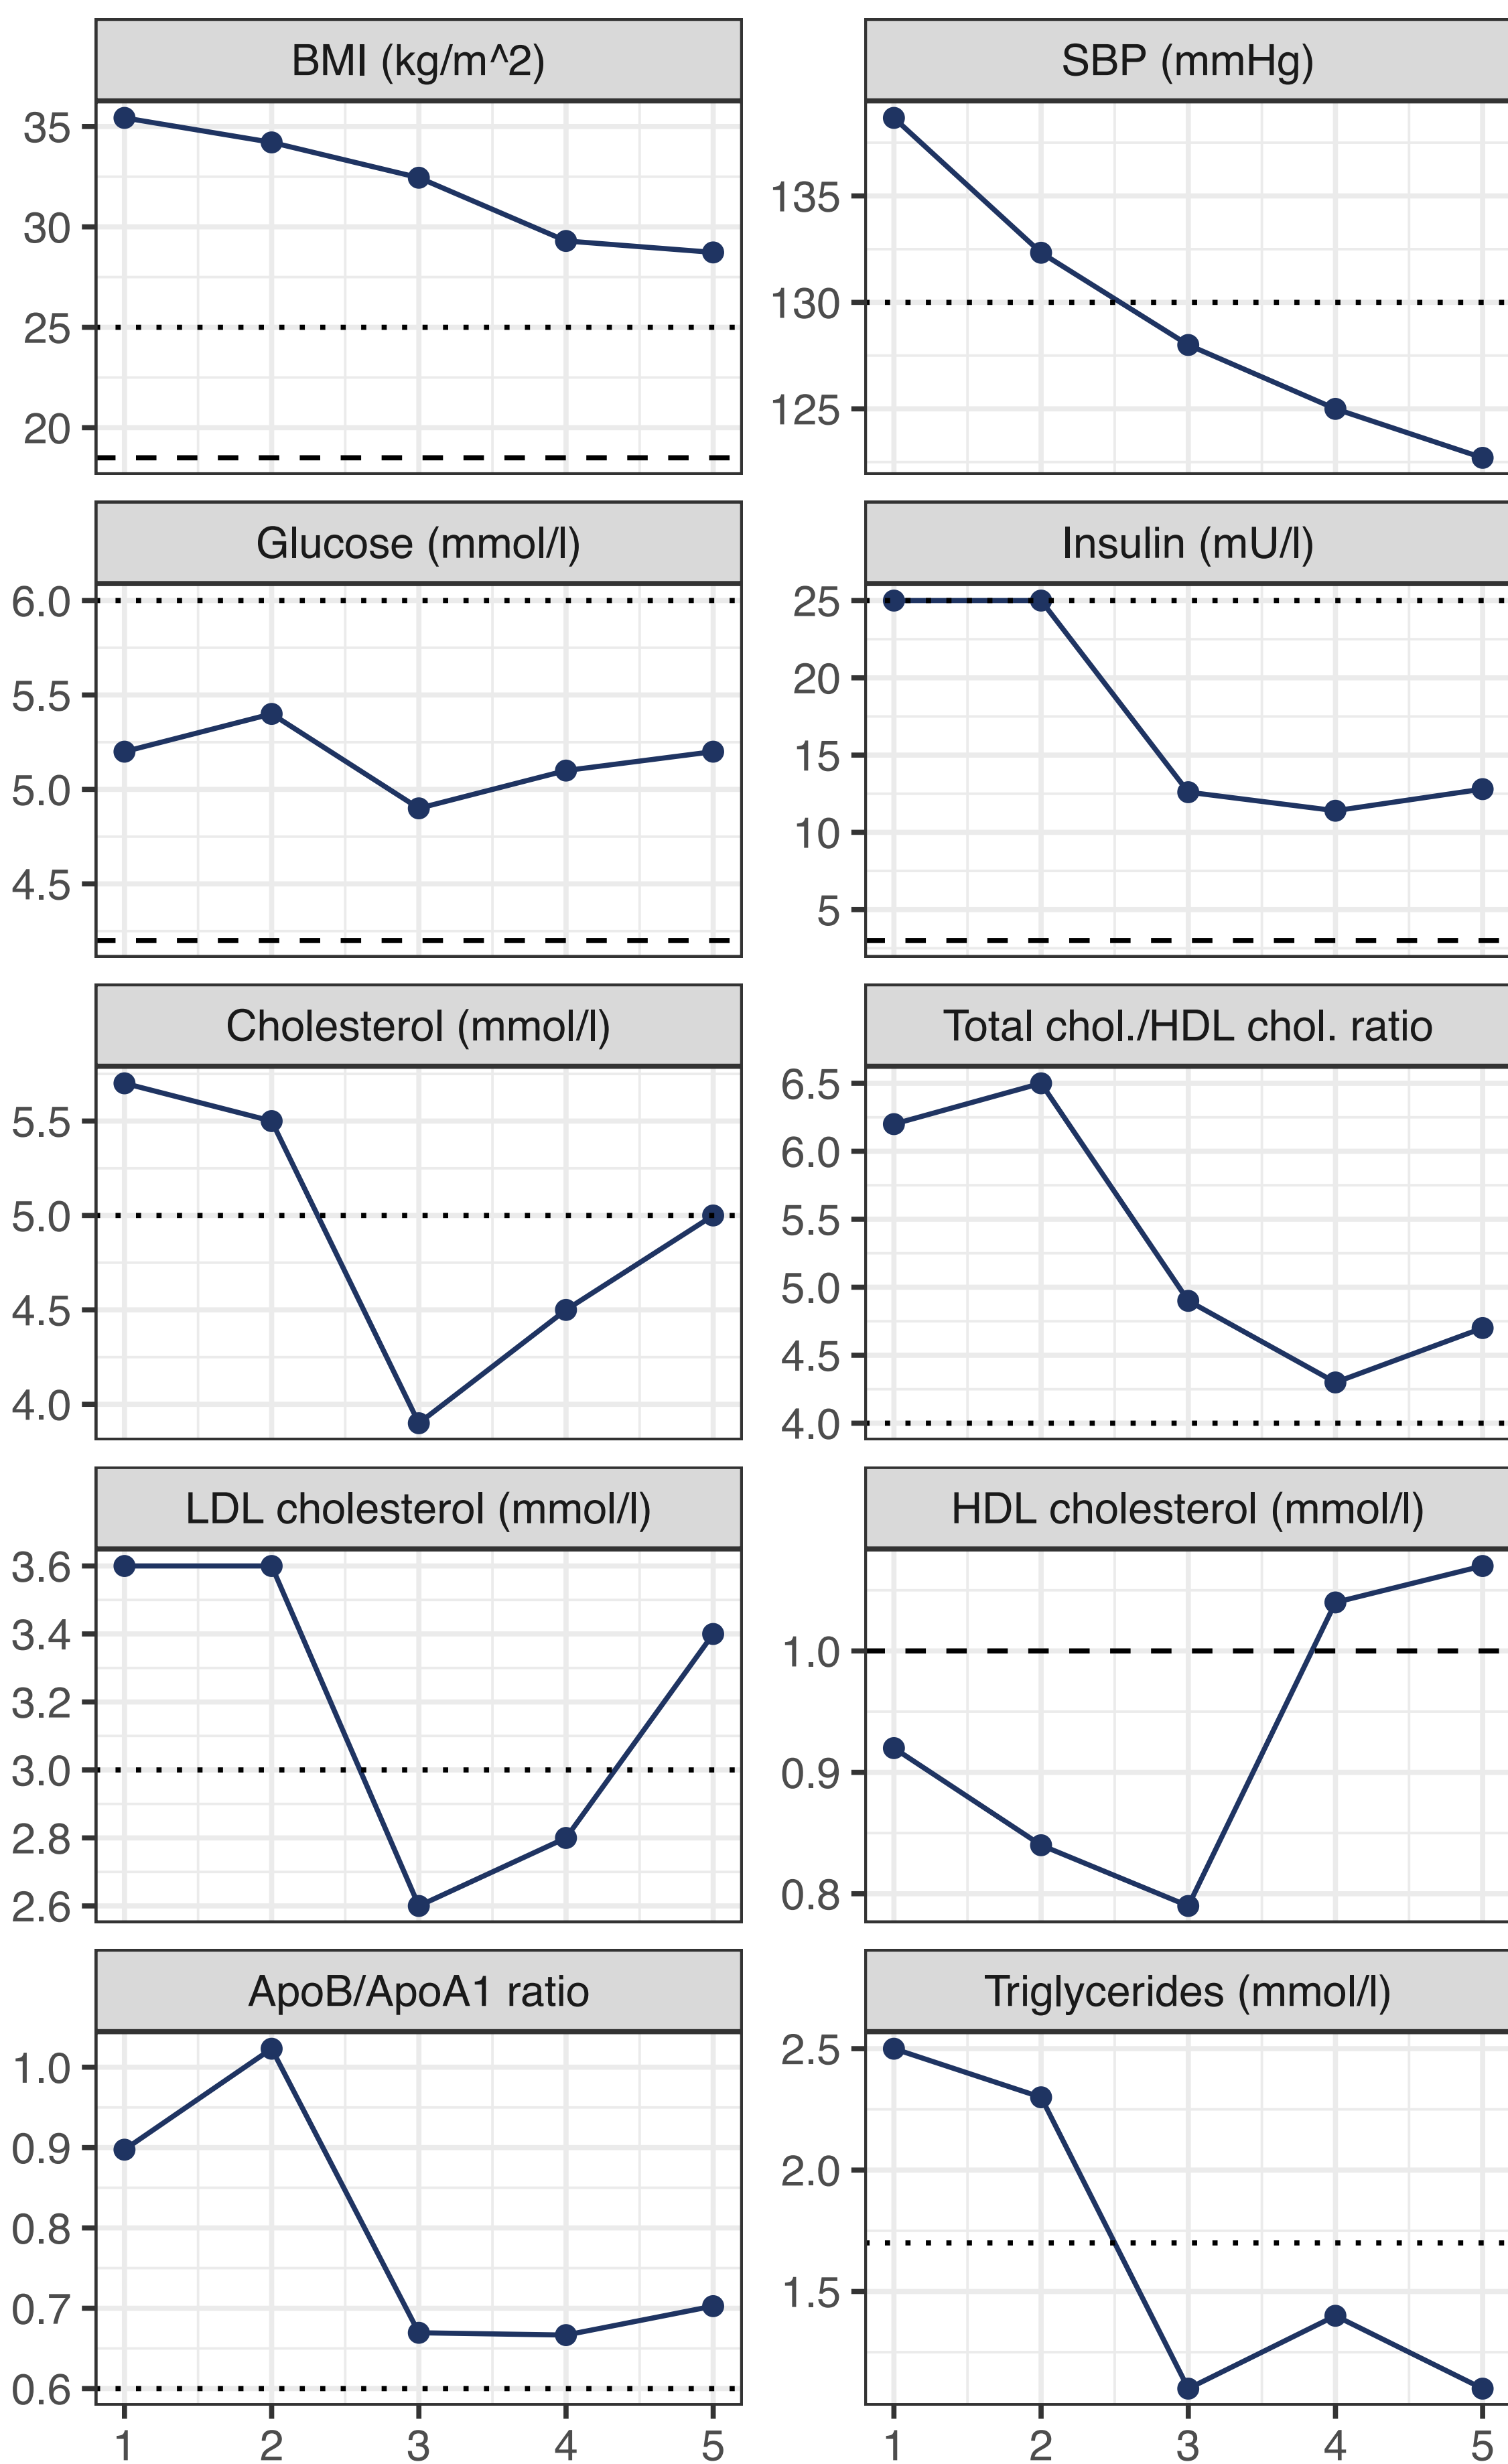

## B Activities

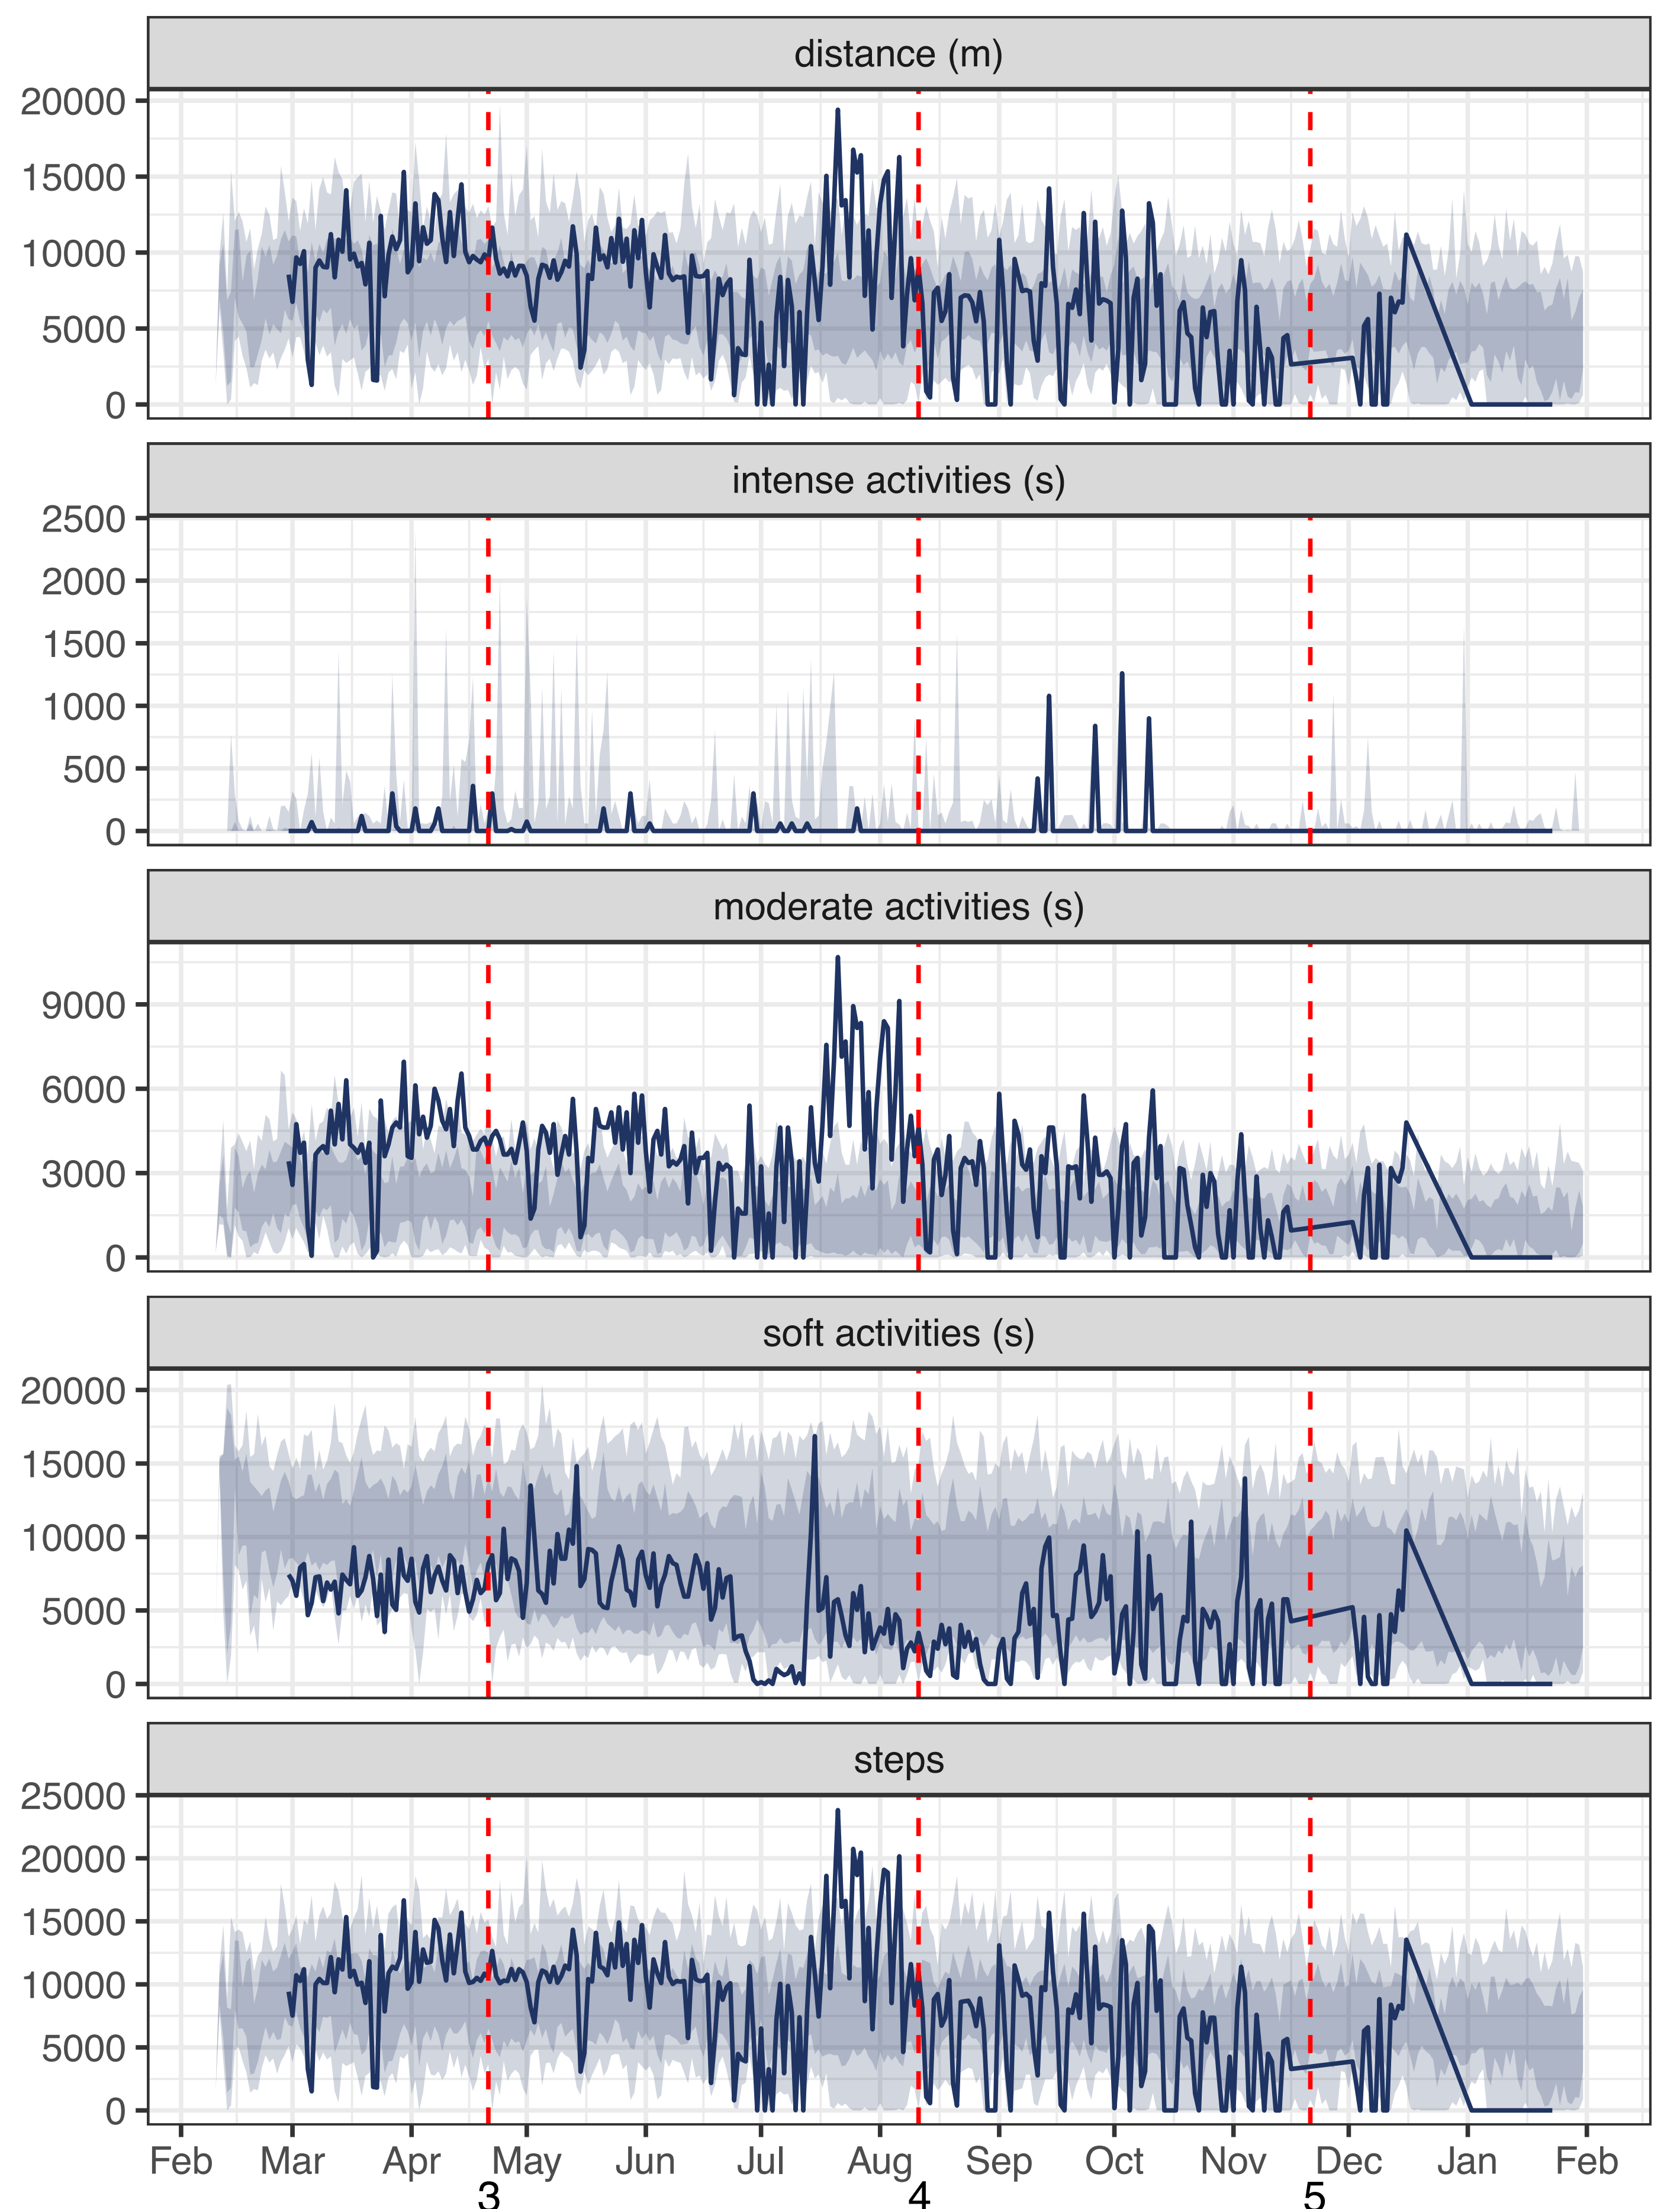

## C Questionnaire

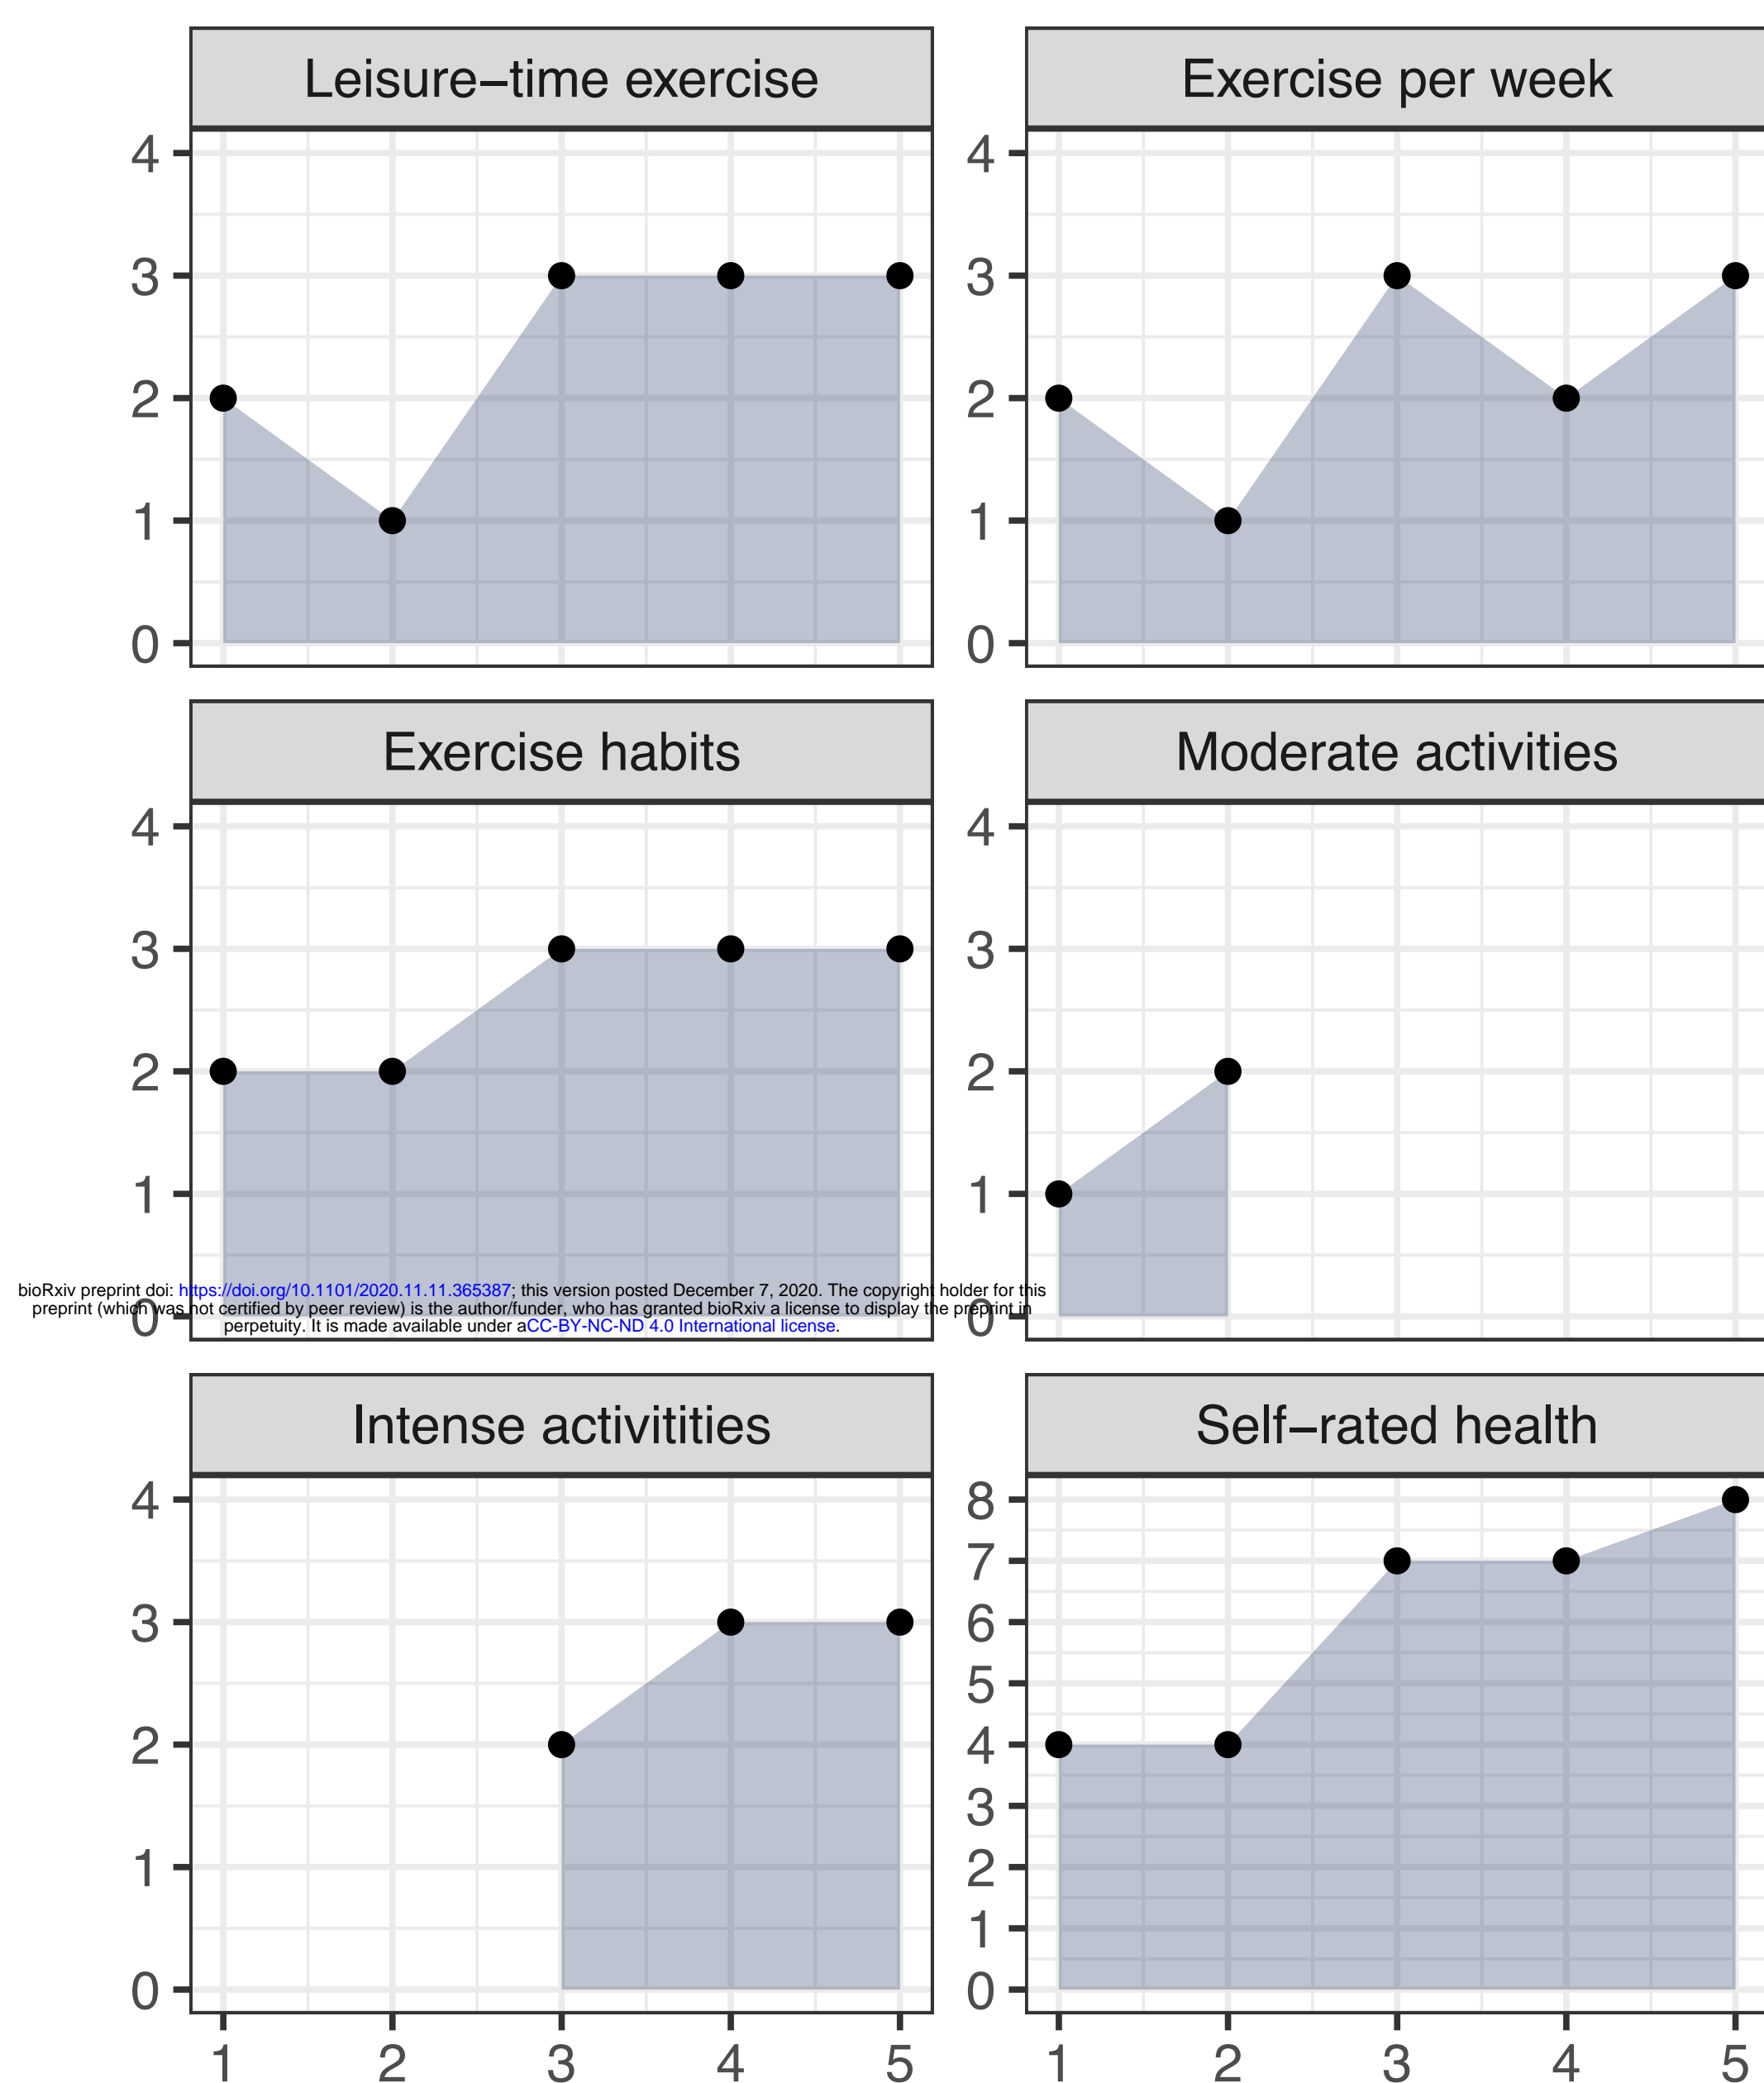

## D MOFA

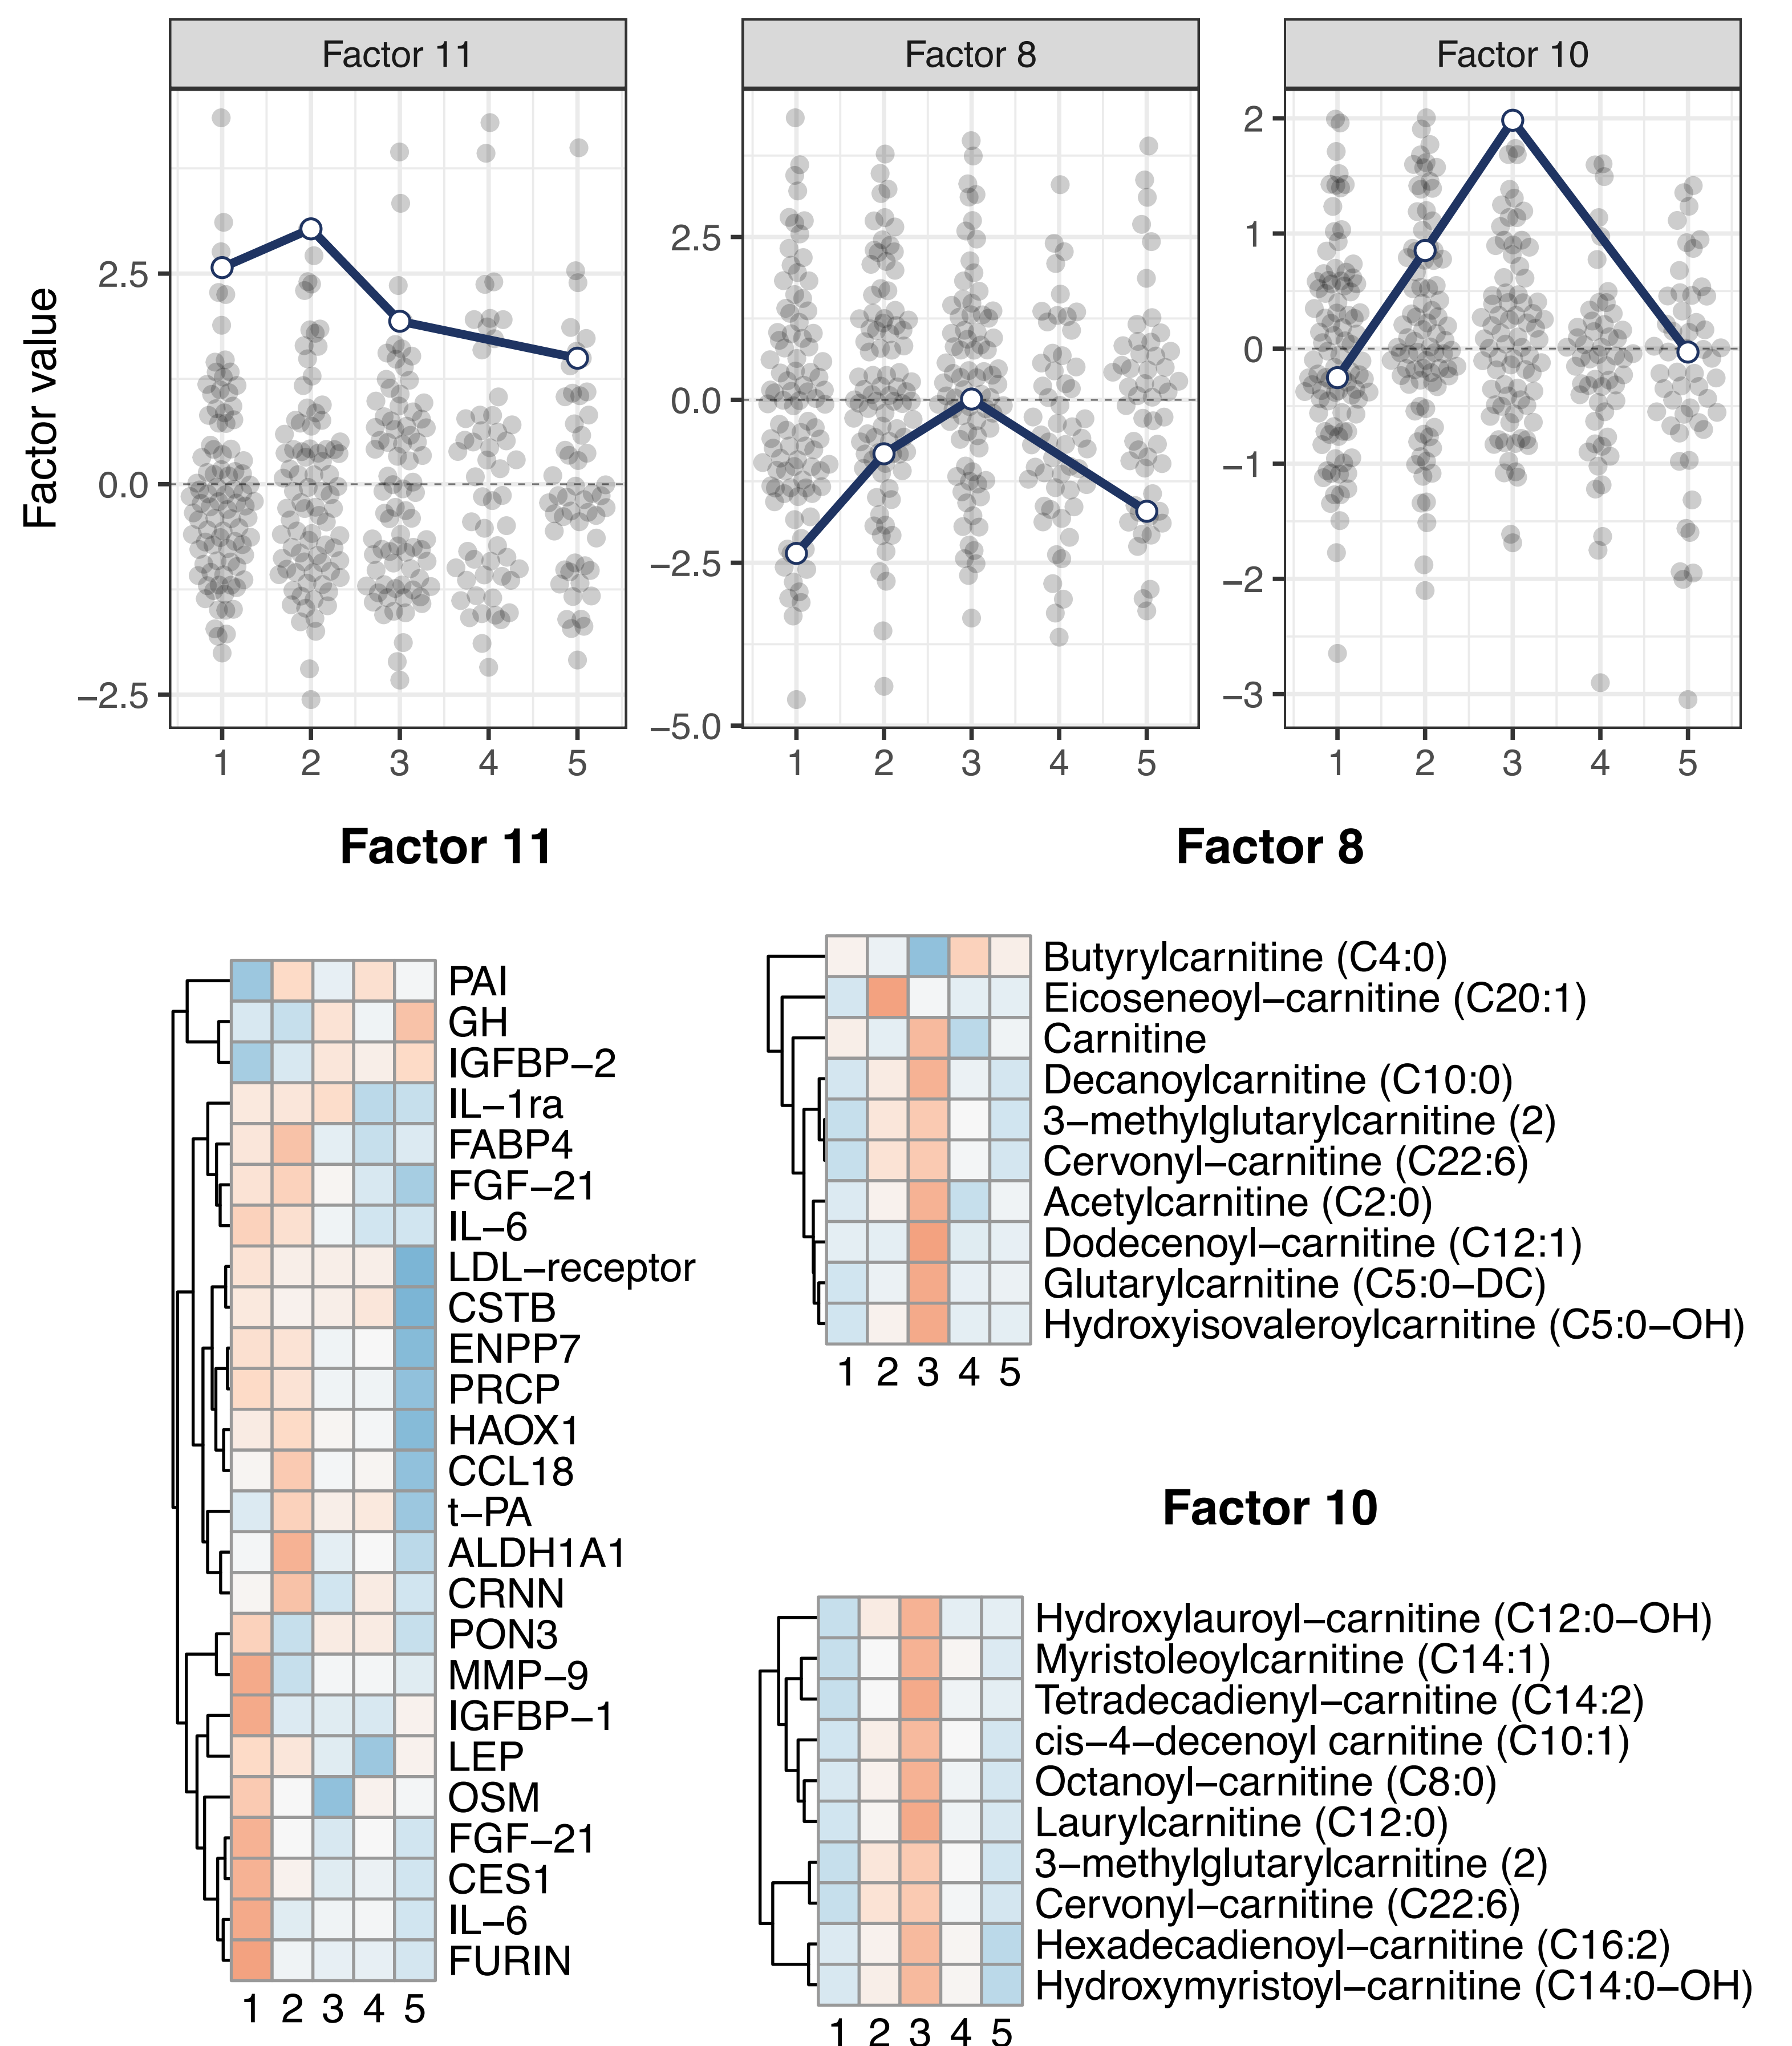

## E Gut microbiome diversity

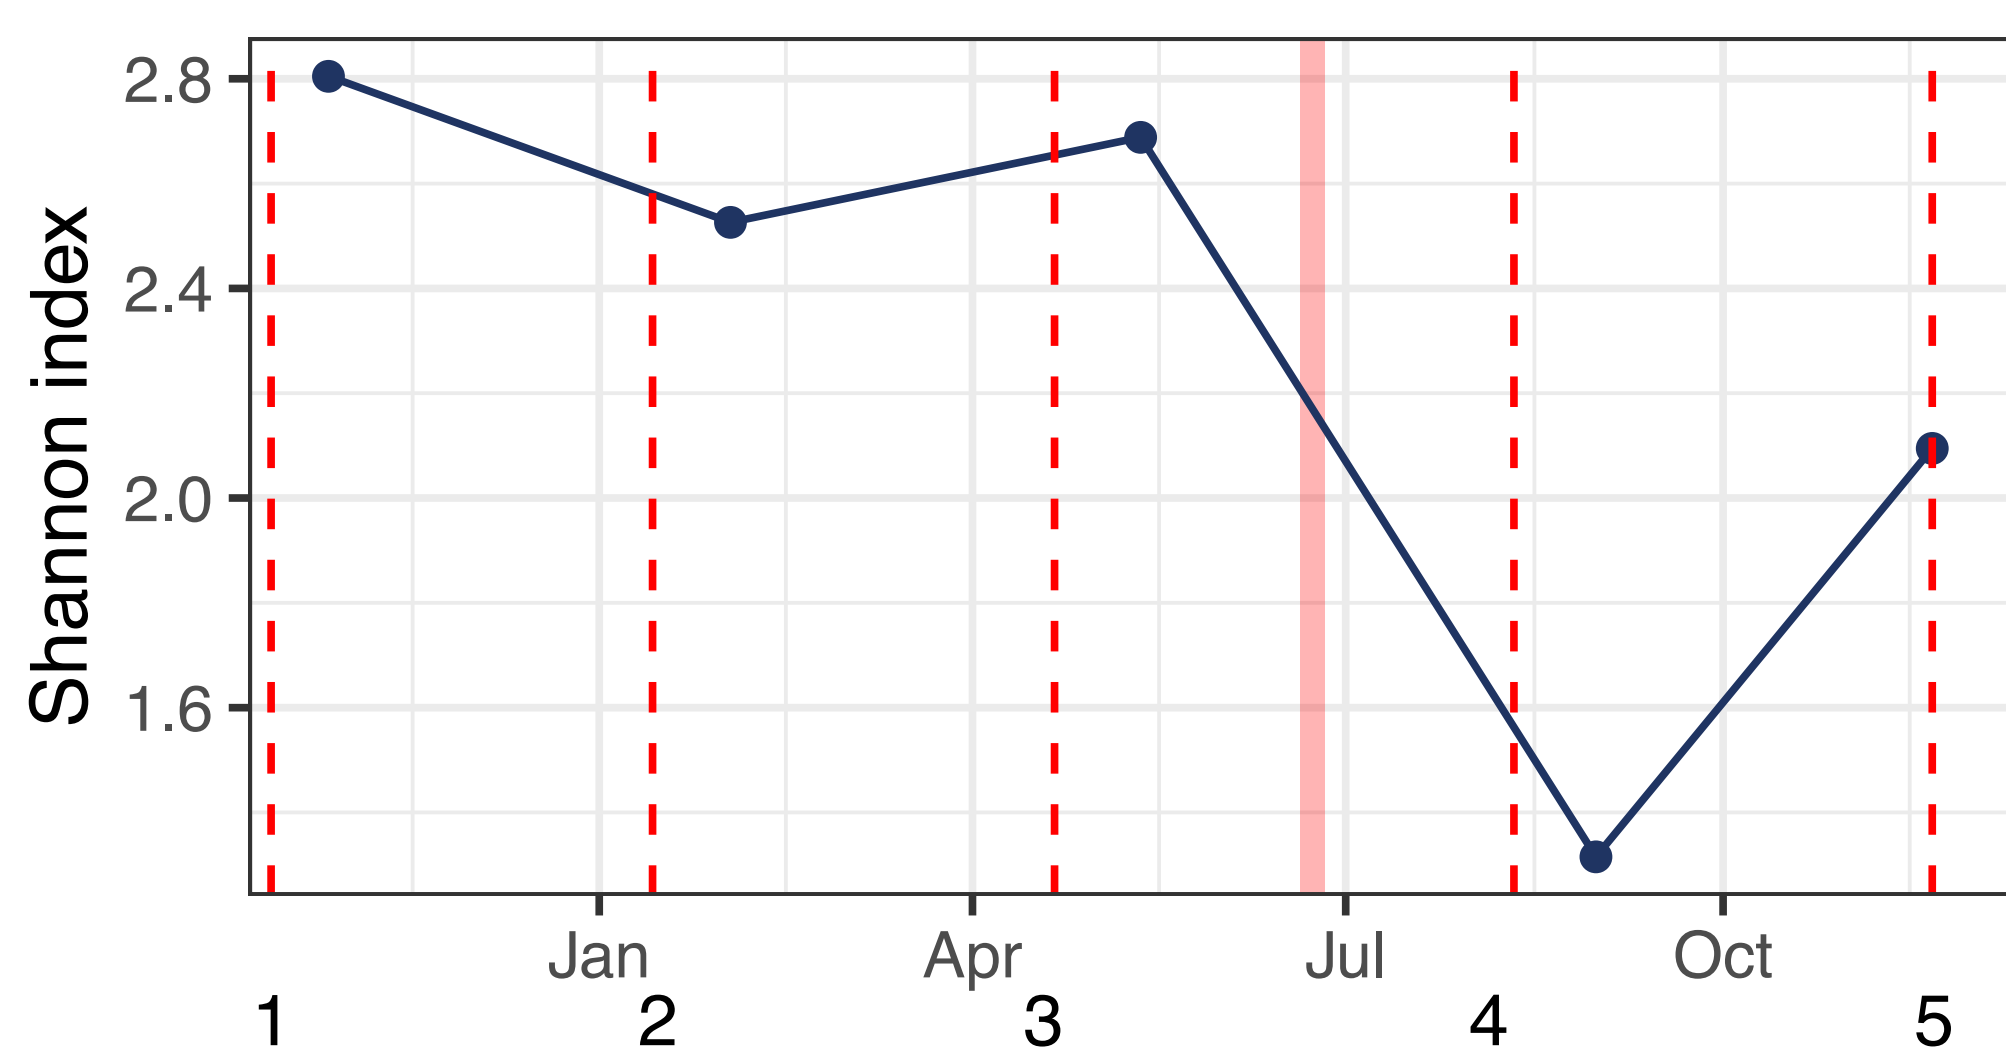

**Figure 6.** A case study: lifestyle change in one individual and the associated molecular changes. **A.** Clinical variables showing longitudinal changes. Reference values are shown (dashed line: lower normal value, dotted line: upper normal value) **B.** Daily summary of the activities recorder by the smart watch included: distance, time spent in intense, moderate or soft activities and number of steps. The shaded area correspond to the 10, 25, 75 and 90 percentiles in the whole population. The study visits are marked with vertical dashed lines **C.** Selected lifestyle questions. The numbers correspond to orderer categories, where a higher number corresponds to higher frequency or more favorable outcome. **D.** Longitudinal values for selected MOFA+ factors (blue line) plotted together with the factor values for the remaining samples at each study visit (grey dots). The top features for the corresponding factors are shown as heatmaps (row z-score, blue:low, red:high). **E.** Gut microbiome diversity (Shannon index). The vertical dashed line mark the date for the study visit, which could be different than the fecal sample collection date (dots). A red shaded area mark a period of antibiotic treatment.
